# Supplementary material for: Four and a half LIM domain protein 1 as a Novel Prognostic Biomarker and Correlation with Immune Infiltration Levels in Lung Adenocarcinoma
Source: Research Square preprint supplement (doi:10.21203/rs.3.rs-1239170/v1), 2022-01-25
Supplement: Supplementary file 1 [file 33a8bb72c7abfe9098127113.xlsx]

## Sheet: GSE118370
Normal	Tumor
12.912	8.21953
13.7615	11.0034
12.8251	10.7577
13.6446	9.90562
13.6211	11.7965
13.1478	10.7632

## Sheet: GSE63459
Normal	Tumor
10.872	9.796
11.644	8.412
11.628	9.145
11.488	7.829
10.785	9.976
10.887	9.781
10.547	7.457
9.995	8.489
10.918	8.383
10.296	8.639
11.091	8.003
10.938	9.559
11.24	7.378
10.904	9.209
10.404	8.922
10.324	10.051
10.638	7.3
10.399	9.632
10.778	7.689
11.341	7.857
11.2	9.049
10.86	7.616
10.781	7.572
10.959	9.478
10.533	9.626
10.446	9.004
9.921	9.828
10.757	9.382
11.381	8.612
10.711	10.085
10.814	7.831
10.94	10.137
	8.499

## Sheet: GSE27262
Normal	Tumor
1.37614	-1.08339
1.72656	-0.280247
2.04873	-2.69114
1.99176	-1.10488
1.65586	-2.36531
-1.5902	-3.01368
1.85119	-3.25629
1.61058	-0.655037
1.03987	-2.16316
-0.893296	-3.47272
2.21634	-1.99303
1.00002	-3.47869
1.84485	-1.78375
1.81152	0.567628
1.79186	0.0413448
1.65287	-1.22081
1.42677	-0.108078
1.85554	-1.61316
1.9753	-2.20163
1.93694	-2.66027
2.12268	-2.30729
1.77467	-0.0425645
1.83023	-1.07668
1.98128	-1.87956
2.19061	-2.72448
