# Supplementary material for: Four and a half LIM domain protein 1 as a Novel Prognostic Biomarker and Correlation with Immune Infiltration Levels in Lung Adenocarcinoma
Source: Research Square preprint supplement (doi:10.21203/rs.3.rs-1239170/v1), 2022-01-25
Supplement: Supplementary file 3 [file 5a0a679a6e139b75415879d7.xlsx]

## Sheet: Sheet 1
gene_name	gene_id	gene_biotype	baseMean	log2FoldChange	lfcSE	stat	pvalue	padj
TSPAN6	ENSG00000000003	protein_coding	3337.15	-0.154188	0.0653044	-2.36106	0.0182228	0.0403863
TNMD	ENSG00000000005	protein_coding	6.83749	-0.149816	0.29646	-0.505349	0.613314	0.712214
DPM1	ENSG00000000419	protein_coding	1598.64	-0.304992	0.0477745	-6.38399	1.7253e-10	2.33955e-09
SCYL3	ENSG00000000457	protein_coding	951.627	-0.0216471	0.0420405	-0.514909	0.606616	0.706481
C1orf112	ENSG00000000460	protein_coding	467.886	-0.43247	0.0605809	-7.13872	9.42066e-13	1.88465e-11
FGR	ENSG00000000938	protein_coding	1045.03	0.579047	0.0849622	6.81535	9.40369e-12	1.5795e-10
CFH	ENSG00000000971	protein_coding	5442.9	0.178572	0.0967839	1.84506	0.0650291	0.118511
FUCA2	ENSG00000001036	protein_coding	3619.47	-0.292169	0.0545396	-5.35701	8.46107e-08	7.07297e-07
GCLC	ENSG00000001084	protein_coding	5702.49	-0.630216	0.13998	-4.50218	6.72603e-06	3.73877e-05
NFYA	ENSG00000001167	protein_coding	2226.49	-0.117592	0.0489512	-2.40224	0.0162952	0.0366652
STPG1	ENSG00000001460	protein_coding	578.851	0.259069	0.0524173	4.94244	7.71514e-07	5.2755e-06
NIPAL3	ENSG00000001461	protein_coding	2350.36	0.357448	0.0571131	6.25859	3.88463e-10	4.99722e-09
LAS1L	ENSG00000001497	protein_coding	2071.44	-0.208358	0.0389626	-5.34764	8.91098e-08	7.40481e-07
ENPP4	ENSG00000001561	protein_coding	2296.05	0.217426	0.0665598	3.26662	0.0010884	0.00349333
SEMA3F	ENSG00000001617	protein_coding	1845.44	-0.149184	0.0849535	-1.75606	0.0790774	0.1396
CFTR	ENSG00000001626	protein_coding	976.485	0.365207	0.162088	2.25314	0.0242505	0.0514842
ANKIB1	ENSG00000001629	protein_coding	3412.39	-0.183834	0.0524346	-3.50596	0.000454962	0.00161127
CYP51A1	ENSG00000001630	protein_coding	297.74	-0.0750958	0.0746604	-1.00583	0.314496	0.4295
KRIT1	ENSG00000001631	protein_coding	1634.47	-0.136066	0.045492	-2.991	0.00278066	0.00790882
RAD52	ENSG00000002016	protein_coding	389.896	-0.193617	0.0564564	-3.4295	0.000604691	0.00207279
MYH16	ENSG00000002079	transcribed_unitary_pseudogene	48.6503	-0.32456	0.145532	-2.23016	0.0257367	0.0541751
BAD	ENSG00000002330	protein_coding	1820.29	-0.173476	0.0617542	-2.80914	0.00496742	0.013103
LAP3	ENSG00000002549	protein_coding	6000.59	0.0740568	0.0545398	1.35785	0.174512	0.267993
CD99	ENSG00000002586	protein_coding	8312.92	-0.0665702	0.0650954	-1.02266	0.30647	0.420965
HS3ST1	ENSG00000002587	protein_coding	1253.45	-0.173618	0.106481	-1.6305	0.102996	0.173528
AOC1	ENSG00000002726	protein_coding	2095.27	-0.533577	0.194201	-2.74755	0.00600418	0.0155029
WNT16	ENSG00000002745	protein_coding	33.8601	-1.40528	0.168291	-8.35028	6.81036e-17	2.64318e-15
HECW1	ENSG00000002746	protein_coding	100.469	0.143823	0.11738	1.22528	0.220471	0.323403
MAD1L1	ENSG00000002822	protein_coding	1612.85	-0.0653064	0.0578164	-1.12955	0.258667	0.368025
LASP1	ENSG00000002834	protein_coding	16013.3	-0.0800466	0.0528325	-1.5151	0.129747	0.209919
SNX11	ENSG00000002919	protein_coding	1342.28	-0.0480293	0.0441982	-1.08668	0.277179	0.38875
TMEM176A	ENSG00000002933	protein_coding	3812.2	-0.303381	0.106401	-2.85129	0.00435425	0.0116991
M6PR	ENSG00000003056	protein_coding	3878.18	0.0327689	0.052432	0.624978	0.531985	0.642223
KLHL13	ENSG00000003096	protein_coding	163.241	0.17847	0.133901	1.33286	0.182579	0.277812
CYP26B1	ENSG00000003137	protein_coding	275.319	0.0460948	0.108039	0.426651	0.669634	0.757852
ICA1	ENSG00000003147	protein_coding	2403.18	-0.323181	0.0626449	-5.15894	2.48351e-07	1.87897e-06
DBNDD1	ENSG00000003249	protein_coding	1602.25	-0.467685	0.0782549	-5.97644	2.28069e-09	2.5608e-08
ALS2	ENSG00000003393	protein_coding	1413.99	-0.137806	0.0392453	-3.51141	0.000445743	0.00158314
CASP10	ENSG00000003400	protein_coding	1837.62	0.0242293	0.0575682	0.420881	0.673842	0.761196
CFLAR	ENSG00000003402	protein_coding	8999.24	0.228577	0.0572701	3.99122	6.57355e-05	0.000291
TFPI	ENSG00000003436	protein_coding	9533.02	0.0375167	0.117607	0.319001	0.749726	0.820781
NDUFAF7	ENSG00000003509	protein_coding	644.006	-0.165097	0.038039	-4.3402	1.42351e-05	7.36774e-05
RBM5	ENSG00000003756	protein_coding	3773.7	0.103785	0.0494935	2.09694	0.035999	0.0720678
MTMR7	ENSG00000003987	protein_coding	309.063	-1.20622	0.157494	-7.6588	1.87685e-14	4.94921e-13
SLC7A2	ENSG00000003989	protein_coding	5984.17	-0.739752	0.168698	-4.38506	1.15951e-05	6.12194e-05
ARF5	ENSG00000004059	protein_coding	6121.21	-0.353227	0.0590412	-5.98273	2.19428e-09	2.47338e-08
SARM1	ENSG00000004139	protein_coding	376.851	0.247609	0.0632468	3.91496	9.04182e-05	0.000386264
POLDIP2	ENSG00000004142	protein_coding	5580.98	-0.235138	0.0444327	-5.29201	1.20982e-07	9.80703e-07
PLXND1	ENSG00000004399	protein_coding	9884.17	0.0806456	0.0741214	1.08802	0.276586	0.388107
AK2	ENSG00000004455	protein_coding	7218.27	-0.197486	0.0497663	-3.96826	7.23978e-05	0.000317029
CD38	ENSG00000004468	protein_coding	1189.75	0.182388	0.112708	1.61824	0.10561	0.177149
FKBP4	ENSG00000004478	protein_coding	5842.76	-0.465311	0.0750337	-6.20136	5.59758e-10	6.9973e-09
KDM1A	ENSG00000004487	protein_coding	4277.99	-0.235148	0.0431293	-5.45217	4.97592e-08	4.36761e-07
RBM6	ENSG00000004534	protein_coding	3387.62	-0.0416383	0.0562217	-0.74061	0.45893	0.57444
CAMKK1	ENSG00000004660	protein_coding	565.354	0.095757	0.0702786	1.36253	0.173029	0.26614
RECQL	ENSG00000004700	protein_coding	1205.42	-0.0196106	0.0670302	-0.292564	0.769856	0.835904
VPS50	ENSG00000004766	protein_coding	1217.24	-0.171038	0.0454618	-3.76224	0.000168399	0.000667925
HSPB6	ENSG00000004776	protein_coding	356.256	1.03071	0.121807	8.46185	2.6316e-17	1.0886e-15
ARHGAP33	ENSG00000004777	protein_coding	492.757	-0.424523	0.100634	-4.21848	2.45958e-05	0.000120552
NDUFAB1	ENSG00000004779	protein_coding	2325.53	-0.299866	0.0516927	-5.80093	6.59496e-09	6.83002e-08
PDK4	ENSG00000004799	protein_coding	2363.18	0.434461	0.122466	3.5476	0.000388754	0.00140252
SLC22A16	ENSG00000004809	protein_coding	12.746	0.803132	0.140766	5.70546	1.16031e-08	1.15213e-07
ZMYND10	ENSG00000004838	protein_coding	446.594	1.30725	0.149147	8.76484	1.87043e-18	9.04989e-17
ABCB5	ENSG00000004846	protein_coding	7.63472	0.929689	0.175877	5.28603	1.24998e-07	1.01005e-06
ARX	ENSG00000004848	protein_coding	191.993	0.176881	0.201233	0.878988	0.379408	0.496546
SLC25A13	ENSG00000004864	protein_coding	1820.08	-0.343278	0.0556074	-6.17323	6.69072e-10	8.28495e-09
ST7	ENSG00000004866	protein_coding	1986.25	0.0151345	0.0517871	0.292245	0.770099	0.836097
CDC27	ENSG00000004897	protein_coding	3030.67	-0.0532823	0.0414572	-1.28523	0.19871	0.297133
SLC4A1	ENSG00000004939	protein_coding	4.8615	0.535503	0.143071	3.74292	0.000181897	0.000713951
CALCR	ENSG00000004948	protein_coding	49.5817	-1.1603	0.171147	-6.77956	1.20542e-11	1.98626e-10
HCCS	ENSG00000004961	protein_coding	1090.78	-0.189832	0.0443504	-4.28029	1.86651e-05	9.39145e-05
DVL2	ENSG00000004975	protein_coding	1578.09	-0.203238	0.0463212	-4.38758	1.14617e-05	6.0595e-05
PRSS22	ENSG00000005001	protein_coding	1457.72	-0.425814	0.104012	-4.09389	4.242e-05	0.000197084
UPF1	ENSG00000005007	protein_coding	6253.68	-0.0198372	0.0492027	-0.403172	0.686821	0.771635
SKAP2	ENSG00000005020	protein_coding	3208.4	0.033597	0.0657321	0.51112	0.609267	0.708634
SLC25A5	ENSG00000005022	protein_coding	14994.4	-0.137942	0.0608345	-2.2675	0.0233598	0.0498815
MCUB	ENSG00000005059	protein_coding	950.016	0.0307829	0.0740739	0.415569	0.677725	0.764168
HOXA11	ENSG00000005073	protein_coding	25.5416	-1.19192	0.278228	-4.28398	1.83576e-05	9.25071e-05
POLR2J	ENSG00000005075	protein_coding	1735.79	-0.555298	0.0614559	-9.03572	1.6293e-19	8.98645e-18
DHX33	ENSG00000005100	protein_coding	1151.1	-0.158332	0.0459603	-3.44497	0.000571121	0.00197269
MEOX1	ENSG00000005102	protein_coding	54.5136	1.25884	0.115121	10.9349	7.84936e-28	1.01882e-25
THSD7A	ENSG00000005108	protein_coding	380.091	-0.0207239	0.114775	-0.180561	0.856712	0.900048
LIG3	ENSG00000005156	protein_coding	1685.87	-0.309557	0.0458343	-6.75382	1.43999e-11	2.34686e-10
RPAP3	ENSG00000005175	protein_coding	1474.19	-0.292186	0.0378207	-7.72554	1.11377e-14	3.05209e-13
ACSM3	ENSG00000005187	protein_coding	801.114	0.281832	0.105972	2.65949	0.00782587	0.0194936
REXO5	ENSG00000005189	protein_coding	242.743	-0.31489	0.0659453	-4.77502	1.79692e-06	1.12948e-05
CIAPIN1	ENSG00000005194	protein_coding	2217.61	-0.260053	0.0428361	-6.07087	1.27217e-09	1.50235e-08
SPPL2B	ENSG00000005206	protein_coding	2094.91	-0.252183	0.0666368	-3.78444	0.000154057	0.000617347
FAM214B	ENSG00000005238	protein_coding	1290.49	-0.0661813	0.0529725	-1.24935	0.211536	0.312656
COPZ2	ENSG00000005243	protein_coding	494.42	0.0850607	0.0857152	0.992364	0.32102	0.436452
PRKAR2B	ENSG00000005249	protein_coding	798.713	0.0149954	0.101369	0.14793	0.882398	0.918199
MSL3	ENSG00000005302	protein_coding	1414.6	0.0695711	0.0350589	1.98441	0.0472104	0.0906526
CREBBP	ENSG00000005339	protein_coding	5529.44	0.184477	0.045261	4.07585	4.58466e-05	0.000211216
TSPOAP1	ENSG00000005379	protein_coding	870.42	0.218569	0.103309	2.11569	0.0343712	0.0693471
MPO	ENSG00000005381	protein_coding	26.6302	0.148964	0.120255	1.23873	0.215444	0.317318
PON1	ENSG00000005421	protein_coding	92.9438	-0.205389	0.154494	-1.32944	0.183704	0.279142
GCFC2	ENSG00000005436	protein_coding	939.916	-0.161144	0.0464619	-3.4683	0.00052377	0.00182293
WDR54	ENSG00000005448	protein_coding	729.603	0.0735644	0.0734563	1.00147	0.316599	0.431768
CROT	ENSG00000005469	protein_coding	727.176	0.153587	0.0604113	2.54235	0.0110109	0.0261717
ABCB4	ENSG00000005471	protein_coding	108.223	-0.463215	0.117586	-3.93937	8.16962e-05	0.000353321
KMT2E	ENSG00000005483	protein_coding	4275.81	0.0477613	0.0461517	1.03488	0.300726	0.414811
RHBDD2	ENSG00000005486	protein_coding	5733.38	-0.187852	0.0540839	-3.47334	0.000514029	0.00179376
SOX8	ENSG00000005513	protein_coding	57.3111	0.339258	0.139406	2.43359	0.01495	0.0340385
IBTK	ENSG00000005700	protein_coding	3402.58	-0.0402391	0.0480707	-0.837081	0.402547	0.519845
ZNF195	ENSG00000005801	protein_coding	1115.85	-0.200293	0.0502864	-3.98304	6.80394e-05	0.000300127
MYCBP2	ENSG00000005810	protein_coding	3025.24	0.371963	0.0649511	5.72683	1.02326e-08	1.02591e-07
FBXL3	ENSG00000005812	protein_coding	2344.02	0.25942	0.045133	5.74789	9.03623e-09	9.13783e-08
ITGAL	ENSG00000005844	protein_coding	1887.21	0.492168	0.0869305	5.66162	1.49949e-08	1.45786e-07
PDK2	ENSG00000005882	protein_coding	1028.9	0.191834	0.0609352	3.14817	0.00164297	0.00500252
ITGA3	ENSG00000005884	protein_coding	26000	0.0105707	0.093421	0.113151	0.909911	0.937806
ZFX	ENSG00000005889	protein_coding	1638.32	0.165282	0.0516242	3.20164	0.00136649	0.00425636
LAMP2	ENSG00000005893	protein_coding	10683.2	0.0688569	0.0537115	1.28198	0.19985	0.29856
ITGA2B	ENSG00000005961	protein_coding	95.7073	-0.592261	0.137732	-4.30011	1.70717e-05	8.66718e-05
ASB4	ENSG00000005981	protein_coding	71.1415	-0.670175	0.156434	-4.28408	1.83493e-05	9.24763e-05
GDE1	ENSG00000006007	protein_coding	6290.7	0.172493	0.053023	3.25317	0.00114127	0.00363983
REX1BD	ENSG00000006015	protein_coding	959.774	-0.236365	0.0699555	-3.37879	0.000728063	0.00243993
CRLF1	ENSG00000006016	protein_coding	6712.58	-0.651009	0.212061	-3.06991	0.00214123	0.00630018
OSBPL7	ENSG00000006025	protein_coding	1013.02	0.0385721	0.0776419	0.496795	0.619334	0.716921
TMEM98	ENSG00000006042	protein_coding	3717.17	0.332689	0.0872201	3.81436	0.000136536	0.00055589
YBX2	ENSG00000006047	protein_coding	290.64	-1.14226	0.171327	-6.66711	2.60882e-11	4.06679e-10
KRT33A	ENSG00000006059	protein_coding	0.437622	0.416092	0.462449	0.899759	0.368248	0.485355
MAP3K14	ENSG00000006062	protein_coding	987.215	0.27501	0.0648779	4.23889	2.2463e-05	0.000111078
ABCC8	ENSG00000006071	protein_coding	50.5592	-0.430933	0.203529	-2.1173	0.0342341	0.0690995
CACNG3	ENSG00000006116	protein_coding	0.823203	-0.237388	0.27506	-0.863042	0.388114	0.505697
TMEM132A	ENSG00000006118	protein_coding	2868.65	-0.515999	0.0947112	-5.44813	5.09008e-08	4.45559e-07
AP2B1	ENSG00000006125	protein_coding	13533	0.0637429	0.0478295	1.33271	0.182627	0.277864
TAC1	ENSG00000006128	protein_coding	15.7343	0.535727	0.411991	1.30034	0.193486	0.290937
ZNF263	ENSG00000006194	protein_coding	1530.03	0.00461483	0.0331233	0.139323	0.889195	0.923162
CX3CL1	ENSG00000006210	protein_coding	4753.44	0.311	0.124957	2.48885	0.0128155	0.0298201
SPATA20	ENSG00000006282	protein_coding	3495.58	-0.169481	0.0634916	-2.66934	0.00759998	0.0190069
CACNA1G	ENSG00000006283	protein_coding	60.8282	0.192733	0.148511	1.29777	0.194366	0.291987
TNFRSF12A	ENSG00000006327	protein_coding	4292.91	-0.0200584	0.0971034	-0.206567	0.836348	0.885059
DLX6	ENSG00000006377	protein_coding	49.8618	-0.688038	0.257059	-2.67657	0.00743791	0.0186408
MAP3K9	ENSG00000006432	protein_coding	1398.3	-0.187711	0.0688707	-2.72555	0.00641939	0.0164233
RALA	ENSG00000006451	protein_coding	3754.78	-0.137035	0.0457588	-2.99473	0.00274689	0.00782979
BAIAP2L1	ENSG00000006453	protein_coding	4595.67	-0.449661	0.0642827	-6.99506	2.65153e-12	4.87279e-11
KDM7A	ENSG00000006459	protein_coding	2006.79	0.0316501	0.0589307	0.537072	0.591218	0.693415
ETV1	ENSG00000006468	protein_coding	2013.11	0.606265	0.100043	6.06003	1.36094e-09	1.59804e-08
AGK	ENSG00000006530	protein_coding	1505.19	-0.203991	0.0370332	-5.50833	3.62253e-08	3.27039e-07
ALDH3B1	ENSG00000006534	protein_coding	6161.1	0.126857	0.106853	1.18721	0.235145	0.340845
TTC22	ENSG00000006555	protein_coding	956.39	-0.241363	0.0778438	-3.1006	0.00193128	0.00577453
PHTF2	ENSG00000006576	protein_coding	1760.76	-0.200049	0.0577077	-3.46658	0.000527122	0.00183372
CCL26	ENSG00000006606	protein_coding	28.19	-0.622629	0.148925	-4.18083	2.9045e-05	0.000140169
FARP2	ENSG00000006607	protein_coding	1811.84	-0.0653187	0.0499211	-1.30844	0.190725	0.287739
USH1C	ENSG00000006611	protein_coding	241.739	0.00560426	0.236237	0.0237231	0.981073	0.987117
GGCT	ENSG00000006625	protein_coding	2612.43	-0.469788	0.0658365	-7.13567	9.63183e-13	1.92246e-11
DBF4	ENSG00000006634	protein_coding	703.813	-0.616454	0.0673975	-9.14653	5.87893e-20	3.43945e-18
TBXA2R	ENSG00000006638	protein_coding	131.951	0.29553	0.0727907	4.06	4.90729e-05	0.000224481
IFRD1	ENSG00000006652	protein_coding	2187.56	-0.542099	0.0746765	-7.25929	3.89128e-13	8.306e-12
LGALS14	ENSG00000006659	protein_coding	0.618322	-1.23589	0.418608	-2.95239	0.00315325	0.00880852
COX10	ENSG00000006695	protein_coding	680.592	-0.114078	0.040828	-2.79411	0.00520432	0.0136391
GTF2IRD1	ENSG00000006704	protein_coding	1662.49	-0.38933	0.051936	-7.49635	6.56186e-14	1.60282e-12
PAF1	ENSG00000006712	protein_coding	3214.37	-0.145907	0.0482809	-3.02204	0.00251075	0.00724721
VPS41	ENSG00000006715	protein_coding	3684.83	0.0367425	0.0435872	0.842967	0.399247	0.516553
ARHGAP44	ENSG00000006740	protein_coding	1108.6	0.421829	0.0943932	4.46885	7.86403e-06	4.2974e-05
ELAC2	ENSG00000006744	protein_coding	2778.38	-0.11785	0.0395979	-2.97618	0.00291867	0.00824193
SCIN	ENSG00000006747	protein_coding	2338.76	-0.486037	0.142571	-3.40909	0.000651799	0.00221552
ARSD	ENSG00000006756	protein_coding	5994.09	0.0651113	0.0774559	0.840623	0.400559	0.517818
PNPLA4	ENSG00000006757	protein_coding	851.742	0.0717696	0.0679842	1.05568	0.291114	0.404113
MYH13	ENSG00000006788	protein_coding	8.46978	-0.0221633	0.171168	-0.129482	0.896976	0.928436
ADIPOR2	ENSG00000006831	protein_coding	3938.27	-0.210656	0.0544598	-3.8681	0.000109688	0.000458333
CDKL3	ENSG00000006837	protein_coding	41.1879	0.0777954	0.0658751	1.18095	0.237622	0.343803
UPP2	ENSG00000007001	protein_coding	8.08807	0.180069	0.146282	1.23097	0.218336	0.320807
PRSS21	ENSG00000007038	protein_coding	288.64	-0.567708	0.195073	-2.91023	0.00361161	0.00991015
MARK4	ENSG00000007047	protein_coding	1672.99	-0.124477	0.0481813	-2.58351	0.00977996	0.0236214
PROM1	ENSG00000007062	protein_coding	1811.88	0.145918	0.195542	0.746224	0.455532	0.571121
CCDC124	ENSG00000007080	protein_coding	2272.18	-0.282588	0.0641108	-4.4078	1.04426e-05	5.57048e-05
CEACAM21	ENSG00000007129	protein_coding	138.689	0.514647	0.0987481	5.21172	1.87097e-07	1.45385e-06
PAFAH1B1	ENSG00000007168	protein_coding	5888.57	0.184921	0.0352842	5.24091	1.59784e-07	1.25945e-06
NOS2	ENSG00000007171	protein_coding	111.56	-0.709691	0.139735	-5.07884	3.79748e-07	2.76129e-06
DNAH9	ENSG00000007174	protein_coding	348.742	2.0979	0.208907	10.0422	9.94035e-24	8.67071e-22
KIAA0100	ENSG00000007202	protein_coding	8378.97	-0.0305038	0.0467961	-0.651845	0.514501	0.626518
SLC13A2	ENSG00000007216	protein_coding	135.325	0.149202	0.27804	0.536621	0.591529	0.69359
GAS7	ENSG00000007237	protein_coding	1645.96	0.857419	0.0745643	11.4991	1.33359e-30	2.14921e-28
TRAPPC6A	ENSG00000007255	protein_coding	1020.05	-0.150769	0.0767114	-1.9654	0.0493677	0.0941272
MATK	ENSG00000007264	protein_coding	234.811	0.312676	0.0967214	3.23274	0.00122608	0.00387468
CEACAM7	ENSG00000007306	protein_coding	135.408	-0.88682	0.183845	-4.82374	1.40895e-06	9.06779e-06
CD79B	ENSG00000007312	protein_coding	391.54	0.616335	0.115631	5.33018	9.81133e-08	8.09864e-07
SCN4A	ENSG00000007314	protein_coding	107.507	-1.25324	0.191352	-6.54939	5.77731e-11	8.52477e-10
ST7L	ENSG00000007341	protein_coding	465.16	0.0122353	0.0468203	0.261324	0.793843	0.85428
TKTL1	ENSG00000007350	protein_coding	21.7257	-0.0557888	0.220163	-0.253398	0.799961	0.85903
PAX6	ENSG00000007372	protein_coding	73.2173	0.572112	0.0769147	7.43826	1.02018e-13	2.42339e-12
RPUSD1	ENSG00000007376	protein_coding	1215.26	-0.270016	0.0647836	-4.16796	3.07332e-05	0.000147596
RHBDF1	ENSG00000007384	protein_coding	2158.37	-0.113893	0.0627789	-1.8142	0.069647	0.125561
LUC7L	ENSG00000007392	protein_coding	2008.94	0.0251992	0.0618247	0.407591	0.683574	0.768923
CACNA2D2	ENSG00000007402	protein_coding	2978.72	0.966554	0.160295	6.02984	1.64124e-09	1.89989e-08
BAIAP3	ENSG00000007516	protein_coding	952.546	0.06284	0.112231	0.559917	0.575536	0.679909
TSR3	ENSG00000007520	protein_coding	1916.38	-0.0727601	0.0526534	-1.38187	0.167012	0.258672
PIGQ	ENSG00000007541	protein_coding	2663.14	0.0659173	0.060862	1.08306	0.278781	0.390492
CRAMP1	ENSG00000007545	protein_coding	915.804	0.0717893	0.0485934	1.47735	0.139583	0.223102
TEAD3	ENSG00000007866	protein_coding	2250.78	-0.0728501	0.0562787	-1.29445	0.19551	0.293339
SELE	ENSG00000007908	protein_coding	141.548	0.856655	0.132319	6.47418	9.53296e-11	1.35766e-09
DNAJC11	ENSG00000007923	protein_coding	1480.58	-0.183507	0.0380374	-4.82438	1.40438e-06	9.03973e-06
FMO3	ENSG00000007933	protein_coding	552.014	0.812129	0.10077	8.0592	7.67927e-16	2.553e-14
MYLIP	ENSG00000007944	protein_coding	1871.27	0.105638	0.061019	1.73124	0.0834093	0.145891
NOX1	ENSG00000007952	protein_coding	93.0669	-0.0401199	0.0926831	-0.432872	0.665108	0.754198
E2F2	ENSG00000007968	protein_coding	349.465	-0.616333	0.0892444	-6.90613	4.9806e-12	8.73813e-11
PSMB1	ENSG00000008018	protein_coding	6213.34	-0.175316	0.0530824	-3.30271	0.000957552	0.00312166
SYN1	ENSG00000008056	protein_coding	84.3989	0.284558	0.111683	2.5479	0.0108372	0.0258013
JARID2	ENSG00000008083	protein_coding	1337.69	-0.0259794	0.0546273	-0.475576	0.634376	0.72898
CDKL5	ENSG00000008086	protein_coding	1001.72	0.496675	0.0691376	7.18385	6.77731e-13	1.3918e-11
CAMK1G	ENSG00000008118	protein_coding	51.4818	0.539955	0.0762749	7.07906	1.45132e-12	2.7951e-11
CDK11A	ENSG00000008128	protein_coding	318.862	-0.201688	0.0655517	-3.07677	0.00209257	0.00617669
NADK	ENSG00000008130	protein_coding	4005	-0.196927	0.0465134	-4.23376	2.29812e-05	0.000113355
TFAP2B	ENSG00000008196	protein_coding	12.5391	-0.297998	0.2981	-0.999656	0.317477	0.432712
TFAP2D	ENSG00000008197	protein_coding	68.6681	-1.44989	0.325917	-4.44866	8.64082e-06	4.69054e-05
DLEC1	ENSG00000008226	protein_coding	304.945	1.39425	0.143976	9.68393	3.5288e-22	2.70283e-20
CYTH3	ENSG00000008256	protein_coding	2907.33	0.445062	0.0862195	5.16197	2.4437e-07	1.85294e-06
ADAM22	ENSG00000008277	protein_coding	262.885	0.221898	0.090882	2.4416	0.0146222	0.0333862
SYPL1	ENSG00000008282	protein_coding	6060.15	-0.0824518	0.0489018	-1.68607	0.0917822	0.157731
CYB561	ENSG00000008283	protein_coding	7621.65	-0.231559	0.0546746	-4.23521	2.28336e-05	0.000112717
SPAG9	ENSG00000008294	protein_coding	5853.61	0.188481	0.0559795	3.36696	0.000760024	0.00253314
CELSR3	ENSG00000008300	protein_coding	884.814	-0.584899	0.111409	-5.25	1.52103e-07	1.20328e-06
AASS	ENSG00000008311	protein_coding	663.39	0.223126	0.0992919	2.24717	0.024629	0.0521856
PLEKHG6	ENSG00000008323	protein_coding	682.214	-0.3619	0.0986481	-3.6686	0.000243883	0.000925815
SS18L2	ENSG00000008324	protein_coding	678.112	-0.22768	0.0497491	-4.57657	4.72664e-06	2.72047e-05
MPND	ENSG00000008382	protein_coding	920.838	-0.0184358	0.056322	-0.327329	0.743419	0.816061
MGST1	ENSG00000008394	protein_coding	14975.8	-0.429454	0.0900673	-4.76815	1.85924e-06	1.16443e-05
CRY1	ENSG00000008405	protein_coding	1149.53	-0.182437	0.0490983	-3.71574	0.00020261	0.000785579
PGLYRP1	ENSG00000008438	protein_coding	3.65353	0.37755	0.137821	2.73943	0.00615466	0.0158433
NFIX	ENSG00000008441	protein_coding	3802.65	0.876489	0.0896209	9.77996	1.3727e-22	1.09796e-20
ST3GAL1	ENSG00000008513	protein_coding	4973.86	0.000652265	0.0928872	0.00702212	0.994397	0.996203
MMP25	ENSG00000008516	protein_coding	181.653	0.20743	0.0896024	2.315	0.0206128	0.0448845
IL32	ENSG00000008517	protein_coding	4093.73	-0.136159	0.0937688	-1.45207	0.146482	0.232118
PKD1	ENSG00000008710	protein_coding	2674	0.212947	0.0639234	3.33128	0.000864476	0.0028467
MAPK8IP2	ENSG00000008735	protein_coding	487.944	-0.693692	0.130282	-5.32455	1.01201e-07	8.32496e-07
MED24	ENSG00000008838	protein_coding	4204.8	-0.248133	0.0474274	-5.23185	1.67823e-07	1.31611e-06
RHOBTB2	ENSG00000008853	protein_coding	5721.59	0.572425	0.104196	5.49373	3.93543e-08	3.52789e-07
HEATR5B	ENSG00000008869	protein_coding	1752.93	0.0659779	0.043286	1.52423	0.127451	0.20693
SEC62	ENSG00000008952	protein_coding	9153.86	-0.0173016	0.0450411	-0.38413	0.700882	0.782746
RPS20	ENSG00000008988	protein_coding	39471.6	-0.276541	0.0626786	-4.41205	1.02396e-05	5.47358e-05
CSDE1	ENSG00000009307	protein_coding	24011.4	0.0317908	0.0401882	0.791046	0.428917	0.545371
UBE3C	ENSG00000009335	protein_coding	4938.01	-0.173359	0.0419036	-4.1371	3.51721e-05	0.000166898
REV3L	ENSG00000009413	protein_coding	1329.43	0.536123	0.0728362	7.36067	1.82991e-13	4.13826e-12
TENM1	ENSG00000009694	protein_coding	524.878	-0.958758	0.207175	-4.62776	3.69641e-06	2.17904e-05
PAX7	ENSG00000009709	protein_coding	379.254	-0.561784	0.348668	-1.61123	0.10713	0.179255
MASP2	ENSG00000009724	protein_coding	56.3689	0.500498	0.0992956	5.04049	4.64353e-07	3.32357e-06
IYD	ENSG00000009765	protein_coding	692.277	0.318748	0.179877	1.77203	0.0763893	0.1357
FAM76A	ENSG00000009780	protein_coding	687.666	0.141732	0.0402051	3.52523	0.000423114	0.00151131
TRAF3IP3	ENSG00000009790	protein_coding	502.156	0.490741	0.088688	5.53334	3.14193e-08	2.873e-07
POMT2	ENSG00000009830	protein_coding	1156.83	-0.235249	0.0485287	-4.84762	1.24954e-06	8.14181e-06
VTA1	ENSG00000009844	protein_coding	1964.78	-0.0593474	0.0451237	-1.31522	0.188437	0.284969
MLXIPL	ENSG00000009950	protein_coding	157.841	-0.595356	0.136725	-4.35441	1.33427e-05	6.95566e-05
BAZ1B	ENSG00000009954	protein_coding	5677.76	-0.170196	0.0437695	-3.88847	0.000100878	0.000426035
RANBP9	ENSG00000010017	protein_coding	3327.11	-0.0131687	0.0426576	-0.308708	0.757544	0.826564
ETV7	ENSG00000010030	protein_coding	594.742	-0.259771	0.0863676	-3.00774	0.00263197	0.00754636
SPRTN	ENSG00000010072	protein_coding	684.748	-0.142057	0.040551	-3.50316	0.000459771	0.00162571
EEF1AKNMT	ENSG00000010165	protein_coding	2255.42	-0.0877571	0.0405604	-2.16361	0.0304941	0.0626026
DYRK4	ENSG00000010219	protein_coding	695.345	-0.0640021	0.0580361	-1.1028	0.270115	0.380875
ZNF207	ENSG00000010244	protein_coding	7868.46	-0.0699897	0.0344389	-2.03228	0.0421249	0.0823391
UQCRC1	ENSG00000010256	protein_coding	6612.78	-0.269691	0.0529327	-5.09498	3.48783e-07	2.55759e-06
STARD3NL	ENSG00000010270	protein_coding	2321.31	-0.123847	0.0580919	-2.13192	0.0330132	0.0670064
CD9	ENSG00000010278	protein_coding	16976.7	0.0584136	0.0769352	0.759257	0.447699	0.563664
HHATL	ENSG00000010282	protein_coding	27.0983	0.114905	0.23492	0.489125	0.624754	0.72144
NCAPD2	ENSG00000010292	protein_coding	4314.08	-0.375571	0.0711906	-5.27557	1.32342e-07	1.06226e-06
IFFO1	ENSG00000010295	protein_coding	554.96	0.524094	0.0743944	7.04481	1.85711e-12	3.50803e-11
GIPR	ENSG00000010310	protein_coding	273.346	0.209301	0.111963	1.86937	0.0615711	0.113165
PHF7	ENSG00000010318	protein_coding	166.725	0.0460284	0.0481683	0.955575	0.339287	0.455536
SEMA3G	ENSG00000010319	protein_coding	403.2	0.731419	0.0817171	8.95062	3.53487e-19	1.87111e-17
NISCH	ENSG00000010322	protein_coding	3848.05	0.159814	0.0495829	3.22316	0.00126785	0.00398763
STAB1	ENSG00000010327	protein_coding	3559.88	0.323731	0.0822433	3.93626	8.27629e-05	0.000357187
FUZ	ENSG00000010361	protein_coding	696.601	-0.0796399	0.0602941	-1.32086	0.186549	0.282623
SLC6A13	ENSG00000010379	protein_coding	14.3928	0.974899	0.146917	6.6357	3.22966e-11	4.95093e-10
IDS	ENSG00000010404	protein_coding	8199.06	0.205424	0.0704296	2.91673	0.00353717	0.00974414
PRSS3	ENSG00000010438	protein_coding	157.798	-0.619534	0.218044	-2.84133	0.0044926	0.0120172
ZNF200	ENSG00000010539	protein_coding	519.106	-0.0672318	0.0390866	-1.72007	0.085419	0.1487
CD4	ENSG00000010610	protein_coding	5355.37	0.668219	0.074664	8.94968	3.56515e-19	1.88484e-17
LRRC23	ENSG00000010626	protein_coding	693.772	0.286365	0.08034	3.56442	0.000364663	0.0013258
BTK	ENSG00000010671	protein_coding	671.102	0.613683	0.0807331	7.60137	2.93007e-14	7.49407e-13
HFE	ENSG00000010704	protein_coding	1023.74	0.0245609	0.0620652	0.395727	0.692306	0.776069
SCMH1	ENSG00000010803	protein_coding	1878.63	-0.144136	0.0449338	-3.20775	0.00133777	0.00417922
FYN	ENSG00000010810	protein_coding	2140.36	0.296076	0.0666546	4.44194	8.91518e-06	4.82933e-05
HIVEP2	ENSG00000010818	protein_coding	2102.72	0.186652	0.0533514	3.49854	0.000467818	0.00165086
FMO1	ENSG00000010932	protein_coding	164.902	0.448118	0.117441	3.81568	0.000135808	0.00055329
ELOA	ENSG00000011007	protein_coding	3567.87	0.123299	0.0406174	3.03561	0.00240047	0.0069646
LYPLA2	ENSG00000011009	protein_coding	4331.42	-0.135697	0.0568786	-2.38573	0.0170453	0.0381078
CLCN6	ENSG00000011021	protein_coding	1026.07	0.124017	0.0545171	2.27483	0.0229163	0.0490966
MRC2	ENSG00000011028	protein_coding	6280.18	0.453965	0.079123	5.73747	9.6104e-09	9.67333e-08
NME1-NME2	ENSG00000011052	protein_coding	37.4014	-0.226577	0.095426	-2.37437	0.0175789	0.0391613
SLC6A7	ENSG00000011083	protein_coding	10.3235	0.115718	0.113369	1.02072	0.307387	0.421958
TSPAN9	ENSG00000011105	protein_coding	2403.98	0.261684	0.0666408	3.92678	8.60896e-05	0.000369557
BTBD7	ENSG00000011114	protein_coding	1984.62	0.0822454	0.048278	1.70358	0.0884597	0.153053
APBA3	ENSG00000011132	protein_coding	704.238	-0.110014	0.0473911	-2.32141	0.0202645	0.0442214
MKS1	ENSG00000011143	protein_coding	828.644	-0.085494	0.0419807	-2.03651	0.0416997	0.0816589
ABHD5	ENSG00000011198	protein_coding	870.399	-0.0147012	0.0477887	-0.30763	0.758364	0.82723
ANOS1	ENSG00000011201	protein_coding	1602.07	0.749904	0.103749	7.22805	4.89971e-13	1.03113e-11
AKAP8L	ENSG00000011243	protein_coding	1781.68	-0.0848746	0.0461933	-1.83738	0.0661541	0.120248
MBTD1	ENSG00000011258	protein_coding	1212.23	-0.020584	0.051642	-0.39859	0.690195	0.774547
UTP18	ENSG00000011260	protein_coding	1834.27	-0.182454	0.0422433	-4.31913	1.56647e-05	8.0319e-05
RNF216	ENSG00000011275	protein_coding	2972.8	-0.0707727	0.0406777	-1.73984	0.0818872	0.143671
TTC19	ENSG00000011295	protein_coding	2258.58	0.099234	0.0490555	2.02289	0.0430844	0.0839044
PTBP1	ENSG00000011304	protein_coding	12354.6	-0.211858	0.0353357	-5.99559	2.02751e-09	2.30337e-08
DPF1	ENSG00000011332	protein_coding	36.4719	-0.402554	0.124619	-3.23027	0.00123673	0.00390407
SYT7	ENSG00000011347	protein_coding	3356.97	-0.642266	0.127737	-5.02806	4.95478e-07	3.52304e-06
LARS2	ENSG00000011376	protein_coding	1008.78	-0.0681245	0.0393905	-1.72947	0.0837257	0.146317
PIK3C2A	ENSG00000011405	protein_coding	3031.44	0.106296	0.0538927	1.97236	0.0485681	0.092828
PLAUR	ENSG00000011422	protein_coding	4396.4	-0.0404829	0.0929929	-0.435333	0.663321	0.752802
ANLN	ENSG00000011426	protein_coding	2376.14	-0.57653	0.111688	-5.16194	2.44398e-07	1.85294e-06
WIZ	ENSG00000011451	protein_coding	2168.71	-0.0860649	0.0502921	-1.7113	0.0870258	0.151
RABGAP1	ENSG00000011454	protein_coding	2791.45	0.0611475	0.0400636	1.52626	0.126945	0.206276
DCN	ENSG00000011465	protein_coding	18871.7	0.912914	0.0868091	10.5163	7.26375e-26	7.79451e-24
QPCTL	ENSG00000011478	protein_coding	764.221	-0.178289	0.0629958	-2.83017	0.0046523	0.0123863
PPP5C	ENSG00000011485	protein_coding	2793.94	-0.1326	0.0430089	-3.08308	0.00204868	0.00606821
CEP68	ENSG00000011523	protein_coding	1280.08	0.231379	0.043197	5.35637	8.49093e-08	7.09657e-07
MAP4K3	ENSG00000011566	protein_coding	2159.54	-0.0960057	0.0478406	-2.00678	0.0447727	0.0867325
ZBTB32	ENSG00000011590	protein_coding	54.8615	0.123529	0.0910423	1.35683	0.174836	0.268339
TYROBP	ENSG00000011600	protein_coding	3764.2	0.431695	0.0957734	4.50746	6.5608e-06	3.65396e-05
TMEM159	ENSG00000011638	protein_coding	3118.05	0.089527	0.0765482	1.16955	0.242182	0.348969
GABRA3	ENSG00000011677	protein_coding	130.55	-0.960713	0.307787	-3.12136	0.0018002	0.00542562
BRCA1	ENSG00000012048	protein_coding	834.273	-0.576066	0.0821245	-7.01454	2.30706e-12	4.29252e-11
ERCC1	ENSG00000012061	protein_coding	2177.13	-0.0550953	0.0484339	-1.13754	0.255315	0.364032
CD22	ENSG00000012124	protein_coding	467.582	1.10473	0.11178	9.88312	4.92726e-23	4.06096e-21
SEMA3B	ENSG00000012171	protein_coding	1882.41	-0.141358	0.130508	-1.08313	0.278749	0.390459
MBTPS2	ENSG00000012174	protein_coding	1354.08	-0.0429945	0.0485797	-0.88503	0.37614	0.493312
PRICKLE3	ENSG00000012211	protein_coding	633.241	-0.267441	0.0565384	-4.73025	2.24245e-06	1.38325e-05
LTF	ENSG00000012223	protein_coding	6038.36	1.08543	0.176875	6.13671	8.42474e-10	1.02621e-08
EXTL3	ENSG00000012232	protein_coding	2425.97	0.0425035	0.0587023	0.724051	0.469035	0.583732
NR1H4	ENSG00000012504	protein_coding	22.6534	-0.894624	0.269103	-3.32447	0.00088588	0.002909
ELOVL5	ENSG00000012660	protein_coding	6440.13	-0.134142	0.0535102	-2.50686	0.0121809	0.0285441
ALOX5	ENSG00000012779	protein_coding	2457.74	0.536925	0.0881279	6.09256	1.1112e-09	1.32525e-08
KDM5D	ENSG00000012817	protein_coding	928.136	-0.0628075	0.311764	-0.201458	0.84034	0.887876
CALCOCO1	ENSG00000012822	protein_coding	3573.74	0.287846	0.052824	5.44916	5.0608e-08	4.43314e-07
UBR7	ENSG00000012963	protein_coding	1811.91	-0.0605622	0.0410184	-1.47646	0.139819	0.223389
MAP4K5	ENSG00000012983	protein_coding	2276.22	-0.000761736	0.0476458	-0.0159875	0.987244	0.991338
EHD3	ENSG00000013016	protein_coding	720.28	0.12067	0.0655188	1.84176	0.0655097	0.119242
PSMC4	ENSG00000013275	protein_coding	4599.28	-0.395934	0.0538756	-7.34904	1.99637e-13	4.49115e-12
MAN2B2	ENSG00000013288	protein_coding	3995.5	0.0643311	0.0512577	1.25505	0.209459	0.310221
SLC7A14	ENSG00000013293	protein_coding	2.48711	0.396172	0.210514	1.88192	0.0598468	0.110559
CLDN11	ENSG00000013297	protein_coding	224.398	0.293419	0.119538	2.45462	0.0141035	0.0323655
SLC25A39	ENSG00000013306	protein_coding	8707.91	-0.441248	0.0577542	-7.6401	2.17048e-14	5.67518e-13
MVP	ENSG00000013364	protein_coding	18891.1	0.0470265	0.0684725	0.686795	0.492212	0.605705
NUB1	ENSG00000013374	protein_coding	4262.32	-0.0804761	0.0387786	-2.07527	0.0379614	0.0753804
PGM3	ENSG00000013375	protein_coding	2390.49	-0.231172	0.0525419	-4.39977	1.08363e-05	5.76625e-05
RWDD2A	ENSG00000013392	protein_coding	414.532	-0.114007	0.051004	-2.23525	0.0254007	0.0535746
CLK1	ENSG00000013441	protein_coding	3340.7	0.0639124	0.0571865	1.11761	0.263732	0.373784
POLR3B	ENSG00000013503	protein_coding	594.439	-0.071515	0.0427914	-1.67125	0.0946731	0.161847
ANGEL1	ENSG00000013523	protein_coding	1452.36	-0.077667	0.0474791	-1.63581	0.101878	0.172021
RNF14	ENSG00000013561	protein_coding	2267.94	-0.00906547	0.0442933	-0.204669	0.837831	0.885937
DNASE1L1	ENSG00000013563	protein_coding	1283.31	-0.0702055	0.0543162	-1.29253	0.196173	0.29409
DDX11	ENSG00000013573	protein_coding	1273.69	-0.544611	0.0751241	-7.24948	4.18363e-13	8.89498e-12
HEBP1	ENSG00000013583	protein_coding	1795.89	0.0565474	0.0485854	1.16388	0.244474	0.351605
GPRC5A	ENSG00000013588	protein_coding	29558.6	-0.128952	0.100833	-1.27887	0.200943	0.299892
MAMLD1	ENSG00000013619	protein_coding	376.952	0.0990158	0.10328	0.958716	0.337702	0.454138
CD6	ENSG00000013725	protein_coding	750.026	0.339355	0.0885672	3.83161	0.00012731	0.000522249
TACC3	ENSG00000013810	protein_coding	2507.7	-0.566546	0.0750688	-7.54703	4.45297e-14	1.11338e-12
UFL1	ENSG00000014123	protein_coding	2098.9	0.0634738	0.0393741	1.61207	0.106946	0.178995
POLA2	ENSG00000014138	protein_coding	1078.33	-0.405413	0.0522844	-7.75399	8.90502e-15	2.48584e-13
ZC3H3	ENSG00000014164	protein_coding	1635.05	-0.367962	0.0558978	-6.58277	4.61762e-11	6.8981e-10
CAPN1	ENSG00000014216	protein_coding	13828	-0.0687823	0.053567	-1.28404	0.199128	0.297665
ACP3	ENSG00000014257	protein_coding	371.674	-0.1302	0.0824071	-1.57996	0.114117	0.188789
MDH1	ENSG00000014641	protein_coding	5242.92	-0.186842	0.0422882	-4.4183	9.94789e-06	5.33343e-05
SLC30A9	ENSG00000014824	protein_coding	3742.61	-0.049224	0.0418696	-1.17565	0.239735	0.346249
MTMR11	ENSG00000014914	protein_coding	1350.29	-0.447337	0.0906323	-4.93573	7.98498e-07	5.43942e-06
COX15	ENSG00000014919	protein_coding	2162.4	-0.110802	0.041646	-2.66058	0.00780069	0.0194432
CCDC88C	ENSG00000015133	protein_coding	2860.54	-0.0193015	0.0653714	-0.295259	0.767796	0.834578
YAF2	ENSG00000015153	protein_coding	745.198	-0.0572516	0.0559478	-1.0233	0.306164	0.420633
ZMYND11	ENSG00000015171	protein_coding	3954.81	0.0372305	0.0418985	0.88859	0.374224	0.491378
WAS	ENSG00000015285	protein_coding	812.926	0.392003	0.0771126	5.08351	3.7052e-07	2.70099e-06
DPEP1	ENSG00000015413	protein_coding	141.256	0.0745721	0.138851	0.537065	0.591223	0.693415
BID	ENSG00000015475	protein_coding	1558.71	-0.201665	0.0672659	-2.99803	0.00271734	0.00775472
MATR3	ENSG00000015479	protein_coding	273.332	0.398284	0.0832342	4.7851	1.70902e-06	1.07876e-05
NPC1L1	ENSG00000015520	protein_coding	182.356	-0.400473	0.20997	-1.90728	0.0564839	0.105315
XYLT2	ENSG00000015532	protein_coding	2319.21	-0.117457	0.048251	-2.4343	0.0149206	0.0339832
RGPD5	ENSG00000015568	protein_coding	0.944542	-0.0509986	0.174181	-0.292792	0.769682	0.835839
STMN4	ENSG00000015592	protein_coding	1.2224	-0.0486676	0.218144	-0.223099	0.823459	0.875523
NUDCD3	ENSG00000015676	protein_coding	5044.97	-0.0271482	0.0435927	-0.622768	0.533437	0.643503
ISL1	ENSG00000016082	protein_coding	43.2774	-0.756641	0.284587	-2.65874	0.00784343	0.0195295
CHDH	ENSG00000016391	protein_coding	838.107	-0.128431	0.0861831	-1.49021	0.136169	0.218467
IL20RA	ENSG00000016402	protein_coding	436.074	0.449832	0.123526	3.6416	0.000270951	0.00101673
CLCA1	ENSG00000016490	protein_coding	5.3071	-1.57811	0.347474	-4.54168	5.58085e-06	3.16221e-05
CLCA4	ENSG00000016602	protein_coding	9.27162	0.571755	0.205331	2.78455	0.00536028	0.0140072
GLT8D1	ENSG00000016864	protein_coding	2142.05	-0.0105701	0.0306269	-0.345123	0.730002	0.805661
ATP2C1	ENSG00000017260	protein_coding	6075.77	-0.118716	0.0509552	-2.3298	0.0198165	0.0433772
IGF1	ENSG00000017427	protein_coding	130.247	0.573159	0.111197	5.15445	2.54372e-07	1.92185e-06
SLC38A5	ENSG00000017483	protein_coding	910.893	0.153686	0.10197	1.50716	0.131769	0.212604
RALBP1	ENSG00000017797	protein_coding	3976.61	-0.0571275	0.0478079	-1.19494	0.232111	0.337338
RUFY3	ENSG00000018189	protein_coding	1693.11	0.0169123	0.0613552	0.275647	0.782819	0.845882
CNTN1	ENSG00000018236	protein_coding	500.44	-0.32506	0.170902	-1.90202	0.057168	0.106378
SLC11A1	ENSG00000018280	protein_coding	1602.05	0.413961	0.0953184	4.34293	1.40598e-05	7.28218e-05
WWTR1	ENSG00000018408	protein_coding	4219.34	0.127022	0.0615258	2.06454	0.0389667	0.0771081
AGPS	ENSG00000018510	protein_coding	2966.83	-0.0471142	0.0451451	-1.04362	0.296662	0.410327
ZNF806	ENSG00000018607	transcribed_unprocessed_pseudogene	0.391743	0.0956793	0.320331	0.298689	0.765177	0.832379
CXorf56	ENSG00000018610	protein_coding	1168.09	-0.0740113	0.0365769	-2.02344	0.0430274	0.0838273
ATP1A2	ENSG00000018625	protein_coding	109.414	1.97173	0.113907	17.3101	3.94967e-67	5.35082e-64
TTC27	ENSG00000018699	protein_coding	998.434	-0.192675	0.0408279	-4.71919	2.36788e-06	1.45153e-05
ZNF582	ENSG00000018869	protein_coding	102.909	0.193818	0.0713218	2.71752	0.00657734	0.016771
VSIG2	ENSG00000019102	protein_coding	1298.81	0.612735	0.162558	3.76934	0.000163679	0.000650992
PHLDB1	ENSG00000019144	protein_coding	3078.01	0.343721	0.0564397	6.09006	1.12867e-09	1.3446e-08
MARCO	ENSG00000019169	protein_coding	2822.78	1.19612	0.141153	8.47393	2.37241e-17	9.87032e-16
CYP24A1	ENSG00000019186	protein_coding	4814.28	-1.01172	0.200189	-5.05382	4.33051e-07	3.11854e-06
PRDM11	ENSG00000019485	protein_coding	478.168	0.358066	0.0583274	6.1389	8.3096e-10	1.01333e-08
SYT13	ENSG00000019505	protein_coding	757.148	-0.67052	0.254572	-2.63391	0.00844085	0.0207843
SNAI2	ENSG00000019549	protein_coding	577.486	0.492081	0.115398	4.2642	2.00621e-05	0.000100251
CD74	ENSG00000019582	protein_coding	183215	0.504256	0.0929135	5.42716	5.72583e-08	4.95165e-07
HGF	ENSG00000019991	protein_coding	706.961	0.911106	0.107222	8.4974	1.93887e-17	8.18443e-16
ZRANB1	ENSG00000019995	protein_coding	749.072	0.0542632	0.0461706	1.17528	0.239884	0.346406
NCDN	ENSG00000020129	protein_coding	1853.05	-0.0120992	0.0501753	-0.241138	0.809448	0.865701
ADGRA2	ENSG00000020181	protein_coding	1341.07	0.659791	0.071381	9.24323	2.39159e-20	1.47273e-18
CCT8L1P	ENSG00000020219	processed_pseudogene	0.922924	-0.168913	0.187241	-0.902115	0.366996	0.484057
ZFP64	ENSG00000020256	protein_coding	943.834	-0.154201	0.0417694	-3.69173	0.000222737	0.000854069
MNAT1	ENSG00000020426	protein_coding	825.089	-0.253476	0.0470514	-5.38721	7.15615e-08	6.08301e-07
SAMD4A	ENSG00000020577	protein_coding	1442.4	0.269072	0.0887681	3.03118	0.00243602	0.00705452
RUNX3	ENSG00000020633	protein_coding	970.65	0.426983	0.0827057	5.16268	2.43434e-07	1.84628e-06
MRE11	ENSG00000020922	protein_coding	1353.99	-0.10768	0.0430128	-2.50343	0.0122996	0.028777
PLEKHB1	ENSG00000021300	protein_coding	1814.15	-0.134245	0.101825	-1.31839	0.187374	0.283675
SERPINB1	ENSG00000021355	protein_coding	10735	-0.315695	0.0749799	-4.2104	2.54924e-05	0.000124481
CYP3A43	ENSG00000021461	protein_coding	2.52958	-0.0372609	0.154748	-0.240784	0.809722	0.865952
SLC7A9	ENSG00000021488	protein_coding	57.1691	-1.77458	0.175908	-10.0881	6.2336e-24	5.62998e-22
SPAST	ENSG00000021574	protein_coding	1483.15	-0.119534	0.0461765	-2.58862	0.00963604	0.0233258
NRXN3	ENSG00000021645	protein_coding	394.24	-0.249559	0.126877	-1.96693	0.0491907	0.0938401
OSBPL5	ENSG00000021762	protein_coding	1653.53	-0.100421	0.0842814	-1.19149	0.233461	0.338937
AQR	ENSG00000021776	protein_coding	2438.67	-0.00109744	0.0429245	-0.0255668	0.979603	0.986131
CPS1	ENSG00000021826	protein_coding	11908.7	-1.73878	0.273306	-6.36204	1.99088e-10	2.67044e-09
C8B	ENSG00000021852	protein_coding	103.427	-0.0719856	0.215835	-0.333521	0.738741	0.812283
RTF2	ENSG00000022277	protein_coding	4205.03	-0.0928969	0.0376708	-2.46602	0.0136624	0.0314966
GABRA1	ENSG00000022355	protein_coding	1.01726	0.767718	0.413437	1.85692	0.063323	0.115904
NLRP2	ENSG00000022556	protein_coding	1320.54	-0.569394	0.179312	-3.17543	0.00149614	0.00460889
SLC45A4	ENSG00000022567	protein_coding	2368.39	-0.26422	0.0851442	-3.10321	0.00191436	0.00572908
RNF10	ENSG00000022840	protein_coding	8117.65	-0.24145	0.0336541	-7.17445	7.2601e-13	1.48183e-11
ZNF839	ENSG00000022976	protein_coding	455.861	-0.179577	0.0480261	-3.73915	0.000184641	0.000723412
ZDHHC6	ENSG00000023041	protein_coding	1943.39	-0.116124	0.0361081	-3.21601	0.00129989	0.00407614
GRAMD1B	ENSG00000023171	protein_coding	670.062	0.0113424	0.146964	0.0771783	0.938482	0.958288
RNH1	ENSG00000023191	protein_coding	8057.84	0.0956969	0.0501145	1.90956	0.0561894	0.10487
NDUFS1	ENSG00000023228	protein_coding	4516.35	-0.148294	0.0424607	-3.49249	0.000478534	0.00168238
RB1CC1	ENSG00000023287	protein_coding	3478.01	-0.0692432	0.0524592	-1.31994	0.186854	0.283005
ERP44	ENSG00000023318	protein_coding	3971.23	-0.142061	0.0384545	-3.69425	0.000220537	0.00084668
ALAS1	ENSG00000023330	protein_coding	3508.59	-0.060087	0.0462836	-1.29824	0.194206	0.291818
BIRC3	ENSG00000023445	protein_coding	5307.8	-0.252686	0.115224	-2.193	0.0283071	0.0587444
AKAP11	ENSG00000023516	protein_coding	2633.1	0.25239	0.0547595	4.60905	4.04505e-06	2.35669e-05
GLRX2	ENSG00000023572	protein_coding	355.913	-0.40948	0.0514341	-7.96126	1.703e-15	5.40076e-14
SNAPC1	ENSG00000023608	protein_coding	589.384	-0.187386	0.0573157	-3.26936	0.0010779	0.00346321
DERA	ENSG00000023697	protein_coding	2259.97	-0.390375	0.0640268	-6.09705	1.08044e-09	1.2914e-08
STRAP	ENSG00000023734	protein_coding	5436.44	-0.361893	0.0596608	-6.06585	1.31257e-09	1.54542e-08
ABCC2	ENSG00000023839	protein_coding	1072.39	-1.21422	0.230293	-5.27249	1.34582e-07	1.07745e-06
DEF6	ENSG00000023892	protein_coding	1289.64	0.104266	0.0577081	1.80678	0.0707963	0.127238
PLEKHO1	ENSG00000023902	protein_coding	2400.07	0.103534	0.0705761	1.46698	0.14238	0.22683
GCLM	ENSG00000023909	protein_coding	2744.53	-0.564316	0.0984917	-5.72958	1.00682e-08	1.01037e-07
UBR2	ENSG00000024048	protein_coding	2851.73	0.094817	0.0419409	2.26073	0.023776	0.0506305
EHD2	ENSG00000024422	protein_coding	7246.22	0.438085	0.0797516	5.49312	3.94895e-08	3.53855e-07
DEPDC1	ENSG00000024526	protein_coding	556.5	-0.771977	0.112408	-6.86764	6.52748e-12	1.12115e-10
CCDC28A	ENSG00000024862	protein_coding	1132.62	0.285169	0.0547579	5.20782	1.91075e-07	1.48158e-06
RRAGD	ENSG00000025039	protein_coding	1376.55	-0.272711	0.0873387	-3.12245	0.0017935	0.00540807
HSF2	ENSG00000025156	protein_coding	650.186	-0.0144052	0.044102	-0.326633	0.743945	0.816536
PHF20	ENSG00000025293	protein_coding	2431.32	0.00106985	0.0397838	0.0268916	0.978546	0.985479
HSD17B6	ENSG00000025423	protein_coding	1138.88	1.37533	0.139519	9.85765	6.35171e-23	5.20528e-21
NR1H3	ENSG00000025434	protein_coding	1496.53	0.0298166	0.0635048	0.469518	0.6387	0.732569
TYMP	ENSG00000025708	protein_coding	7080.25	-0.215116	0.0758859	-2.83472	0.00458655	0.0122368
NCAPH2	ENSG00000025770	protein_coding	2114.17	-0.195775	0.0519272	-3.77019	0.000163123	0.000649077
TOMM34	ENSG00000025772	protein_coding	1954.81	-0.0381718	0.0536233	-0.711852	0.476557	0.590776
SEC63	ENSG00000025796	protein_coding	4894.74	0.0701506	0.0402574	1.74255	0.0814121	0.142994
KPNA6	ENSG00000025800	protein_coding	4588.3	-0.038452	0.0372256	-1.03295	0.301629	0.415752
VIM	ENSG00000026025	protein_coding	35263.6	0.588034	0.0716631	8.20553	2.2957e-16	8.27291e-15
RTEL1-TNFRSF6B	ENSG00000026036	protein_coding	205.169	-0.281547	0.0949654	-2.96473	0.00302949	0.00851272
FAS	ENSG00000026103	protein_coding	1280.09	0.46598	0.0862593	5.40208	6.58734e-08	5.63263e-07
RNASET2	ENSG00000026297	protein_coding	3193.07	-0.229825	0.0743132	-3.09265	0.00198379	0.00590619
CD44	ENSG00000026508	protein_coding	16698.5	0.403568	0.0785832	5.13555	2.81325e-07	2.10385e-06
KCNG1	ENSG00000026559	protein_coding	24.4879	0.342366	0.157759	2.17018	0.0299933	0.0617123
AGPAT4	ENSG00000026652	protein_coding	432.223	0.548668	0.0761243	7.20753	5.69773e-13	1.18186e-11
SLAMF7	ENSG00000026751	protein_coding	2321.99	0.0366781	0.109451	0.33511	0.737542	0.811274
BTN3A1	ENSG00000026950	protein_coding	2763.52	0.182922	0.0606019	3.01843	0.00254092	0.00732455
MIPEP	ENSG00000027001	protein_coding	782.425	0.00747454	0.0514504	0.145276	0.884493	0.919842
PRKCH	ENSG00000027075	protein_coding	1689.1	0.334109	0.0493819	6.76582	1.32558e-11	2.17019e-10
INSRR	ENSG00000027644	protein_coding	7.78677	0.147646	0.158563	0.931147	0.351777	0.468261
IFNGR1	ENSG00000027697	protein_coding	5771.47	0.284773	0.0620063	4.59264	4.37678e-06	2.53259e-05
B4GALT7	ENSG00000027847	protein_coding	1545.64	-0.119689	0.0499526	-2.39606	0.0165724	0.0371983
SH2D2A	ENSG00000027869	protein_coding	352.541	-0.13592	0.0834724	-1.62832	0.103457	0.174164
VRK2	ENSG00000028116	protein_coding	939.948	-0.190889	0.0473019	-4.03554	5.4476e-05	0.000246261
TNFRSF1B	ENSG00000028137	protein_coding	3125.22	0.343396	0.0676527	5.07587	3.8573e-07	2.80009e-06
VEZT	ENSG00000028203	protein_coding	4429.14	-0.118606	0.0433576	-2.73553	0.00622806	0.0160047
POU2F2	ENSG00000028277	protein_coding	634.85	0.0908374	0.0903283	1.00564	0.314591	0.429561
BRD9	ENSG00000028310	protein_coding	2544.55	-0.280873	0.0538322	-5.21756	1.81291e-07	1.41205e-06
SNX1	ENSG00000028528	protein_coding	5106.8	0.181354	0.035327	5.13357	2.84295e-07	2.12487e-06
TBPL1	ENSG00000028839	protein_coding	634.093	-0.00696335	0.050617	-0.137569	0.890581	0.92403
ARNTL2	ENSG00000029153	protein_coding	1848.71	-0.29675	0.128905	-2.30208	0.0213307	0.0462319
BCLAF1	ENSG00000029363	protein_coding	5192.02	0.129409	0.0362591	3.56902	0.000358317	0.00130569
SLC39A9	ENSG00000029364	protein_coding	4631.94	-0.0678497	0.0391947	-1.7311	0.0834348	0.14592
ANK1	ENSG00000029534	protein_coding	145.492	0.788335	0.144237	5.46556	4.61448e-08	4.07593e-07
IBSP	ENSG00000029559	protein_coding	96.823	0.611421	0.196693	3.10851	0.00188032	0.00563965
TFB1M	ENSG00000029639	protein_coding	455.401	-0.128834	0.0491752	-2.6199	0.00879563	0.0215355
RABEP1	ENSG00000029725	protein_coding	2203.83	0.162578	0.0345664	4.70335	2.55929e-06	1.55742e-05
HMGB3	ENSG00000029993	protein_coding	14422.5	-1.01527	0.109227	-9.29503	1.47159e-20	9.35432e-19
NUP160	ENSG00000030066	protein_coding	3076.56	0.0105656	0.0452785	0.233347	0.815492	0.870168
BAK1	ENSG00000030110	protein_coding	1626.27	-0.179325	0.0580345	-3.08997	0.00200176	0.00595039
MUSK	ENSG00000030304	protein_coding	20.437	1.58502	0.143746	11.0266	2.84535e-28	3.86682e-26
IKZF2	ENSG00000030419	protein_coding	1048.02	0.227944	0.0795666	2.86482	0.00417245	0.0112588
GRN	ENSG00000030582	protein_coding	29981.8	0.182917	0.0601287	3.0421	0.00234935	0.00683413
FAM13B	ENSG00000031003	protein_coding	1197.75	0.357427	0.0548134	6.52079	6.99396e-11	1.01746e-09
ARHGAP31	ENSG00000031081	protein_coding	1868	0.875653	0.0734239	11.926	8.66424e-33	1.64742e-30
CENPQ	ENSG00000031691	protein_coding	347.16	-0.217517	0.0646044	-3.3669	0.000760174	0.00253345
SARS1	ENSG00000031698	protein_coding	6313.4	-0.0193783	0.0416833	-0.464894	0.642007	0.735215
RANBP3	ENSG00000031823	protein_coding	2519.57	-0.0165608	0.033774	-0.490341	0.623893	0.720679
ARID4A	ENSG00000032219	protein_coding	1223.56	0.217388	0.0483554	4.49563	6.93651e-06	3.84247e-05
EIPR1	ENSG00000032389	protein_coding	1440.2	-0.334074	0.0468786	-7.12636	1.0306e-12	2.04478e-11
PNPLA6	ENSG00000032444	protein_coding	3174.05	0.196542	0.0538193	3.65189	0.000260313	0.000981058
IFT88	ENSG00000032742	protein_coding	588.356	0.162687	0.0502561	3.23716	0.00120725	0.00382298
ALG1	ENSG00000033011	protein_coding	1235.79	0.0114307	0.0495416	0.230728	0.817526	0.871567
ZCCHC8	ENSG00000033030	protein_coding	1337.43	-0.324728	0.0321956	-10.0861	6.36461e-24	5.72445e-22
ABCF2	ENSG00000033050	protein_coding	3229.94	-0.285572	0.0416637	-6.85422	7.17043e-12	1.22142e-10
CHPF2	ENSG00000033100	protein_coding	5114.93	-0.273333	0.050783	-5.38237	7.35128e-08	6.22447e-07
LRRC7	ENSG00000033122	protein_coding	40.1502	-0.112589	0.0970927	-1.15961	0.24621	0.353738
FUT8	ENSG00000033170	protein_coding	3204.57	-0.168044	0.0743611	-2.25984	0.023831	0.0507253
UBA6	ENSG00000033178	protein_coding	2653.22	-0.193523	0.0562463	-3.44062	0.000580374	0.00199835
GAB2	ENSG00000033327	protein_coding	2185.07	0.193523	0.0682689	2.83472	0.00458653	0.0122368
ATP6V0A1	ENSG00000033627	protein_coding	3491.13	0.131542	0.0494024	2.66267	0.00775235	0.0193338
PIAS1	ENSG00000033800	protein_coding	1777.6	0.244171	0.0421027	5.79941	6.65475e-09	6.88208e-08
SLC4A7	ENSG00000033867	protein_coding	1296.36	0.159207	0.079322	2.0071	0.0447395	0.0866836
APBA2	ENSG00000034053	protein_coding	937.857	-0.207436	0.121136	-1.71241	0.0868206	0.150729
MAP2K3	ENSG00000034152	protein_coding	3117.4	-0.102929	0.0539536	-1.90772	0.0564271	0.105237
EFCAB1	ENSG00000034239	protein_coding	215.908	1.74102	0.182085	9.56158	1.15971e-21	8.32381e-20
TMSB10	ENSG00000034510	protein_coding	69180	-0.388621	0.0754673	-5.14953	2.61135e-07	1.96711e-06
ASTE1	ENSG00000034533	protein_coding	397.401	0.010538	0.036941	0.285266	0.77544	0.840098
RNF19A	ENSG00000034677	protein_coding	5299.02	-0.085507	0.0748371	-1.14258	0.253215	0.361562
PEX3	ENSG00000034693	protein_coding	640.247	0.0961625	0.0508182	1.89229	0.058453	0.108367
GABARAPL2	ENSG00000034713	protein_coding	3575.93	0.0336112	0.0489195	0.687071	0.492038	0.605508
MYOC	ENSG00000034971	protein_coding	8.82825	2.19216	0.161403	13.5819	5.12947e-42	1.71056e-39
SH3YL1	ENSG00000035115	protein_coding	3048.96	-0.101695	0.0600966	-1.69219	0.0906097	0.156131
FAM136A	ENSG00000035141	protein_coding	2335.45	-0.464132	0.0421127	-11.0212	3.01993e-28	4.09125e-26
VCL	ENSG00000035403	protein_coding	7383.62	0.316135	0.0578522	5.46453	4.64126e-08	4.09639e-07
DEPDC1B	ENSG00000035499	protein_coding	388.16	-0.718261	0.105703	-6.79508	1.0825e-11	1.79804e-10
DAPK2	ENSG00000035664	protein_coding	969.375	0.445855	0.0907871	4.91099	9.06178e-07	6.09348e-06
NSMAF	ENSG00000035681	protein_coding	1625.88	-0.039441	0.0424922	-0.928195	0.353307	0.469919
ADSS2	ENSG00000035687	protein_coding	3876.51	-0.0736962	0.0406326	-1.81372	0.0697209	0.125651
STAP1	ENSG00000035720	protein_coding	84.7746	0.608085	0.10763	5.64975	1.60683e-08	1.55212e-07
TIMP2	ENSG00000035862	protein_coding	15178.7	0.49545	0.0759174	6.52617	6.74735e-11	9.8391e-10
RFC1	ENSG00000035928	protein_coding	2809.43	-0.10101	0.0424334	-2.38043	0.0172927	0.0385911
TBC1D23	ENSG00000036054	protein_coding	1991.03	-0.048961	0.0437523	-1.11905	0.26312	0.373099
CUL3	ENSG00000036257	protein_coding	3292.3	-0.04178	0.0339508	-1.2306	0.218471	0.320969
MYOM2	ENSG00000036448	protein_coding	81.8371	0.518588	0.102993	5.03515	4.77466e-07	3.4039e-06
OTC	ENSG00000036473	protein_coding	3.90757	2.1471	0.193773	11.0805	1.55992e-28	2.14685e-26
CYP46A1	ENSG00000036530	protein_coding	58.7318	0.21321	0.0983881	2.16703	0.0302323	0.0621417
ZZZ3	ENSG00000036549	protein_coding	1894.03	-0.0159987	0.048442	-0.330265	0.7412	0.814264
SLC18A1	ENSG00000036565	protein_coding	7.9178	0.558644	0.163162	3.42387	0.000617355	0.00211119
USP2	ENSG00000036672	protein_coding	198.274	0.537518	0.109334	4.91632	8.81883e-07	5.94301e-06
CASR	ENSG00000036828	protein_coding	39.2608	1.40676	0.249885	5.62962	1.80607e-08	1.7284e-07
TUBG2	ENSG00000037042	protein_coding	806.544	-0.193413	0.0591317	-3.27088	0.00107213	0.00344645
RPL26L1	ENSG00000037241	protein_coding	773.422	-0.255969	0.0624947	-4.09585	4.2062e-05	0.00019563
FLT4	ENSG00000037280	protein_coding	951.994	0.638755	0.0745792	8.56478	1.08278e-17	4.74629e-16
NSUN2	ENSG00000037474	protein_coding	5041.28	-0.391147	0.0532986	-7.33877	2.15559e-13	4.82442e-12
FBXO42	ENSG00000037637	protein_coding	1473.25	0.038398	0.0298418	1.28672	0.198193	0.296533
MFAP3	ENSG00000037749	protein_coding	807.38	0.251405	0.060227	4.17429	2.98914e-05	0.000143888
MRI1	ENSG00000037757	protein_coding	828.303	-0.031491	0.050031	-0.62943	0.529068	0.63962
METTL1	ENSG00000037897	protein_coding	1224.59	-0.257227	0.0731367	-3.51708	0.00043633	0.00155315
HOXC8	ENSG00000037965	protein_coding	50.4506	-0.638087	0.183335	-3.48045	0.000500569	0.00175175
AGA	ENSG00000038002	protein_coding	1800.45	-0.055173	0.0773966	-0.71286	0.475932	0.590195
PI4K2B	ENSG00000038210	protein_coding	1687.83	-0.203589	0.0532501	-3.82326	0.000131697	0.00053831
BOD1L1	ENSG00000038219	protein_coding	2766.25	0.0941376	0.0555909	1.6934	0.0903794	0.155803
MAT2B	ENSG00000038274	protein_coding	3908.04	0.226276	0.0481906	4.69544	2.66039e-06	1.61238e-05
TLL1	ENSG00000038295	protein_coding	139.498	0.646041	0.101525	6.36336	1.97387e-10	2.64845e-09
EDC4	ENSG00000038358	protein_coding	1931.49	-0.0622381	0.0467471	-1.33138	0.183064	0.278355
TRIO	ENSG00000038382	protein_coding	6985.97	-0.0846214	0.070609	-1.19845	0.230742	0.335743
VCAN	ENSG00000038427	protein_coding	12964.1	0.0272917	0.113244	0.241	0.809555	0.865794
CLEC16A	ENSG00000038532	protein_coding	2172.67	0.182421	0.0461545	3.95241	7.73695e-05	0.000336594
MSR1	ENSG00000038945	protein_coding	3026.11	0.746168	0.102295	7.29431	3.00197e-13	6.54306e-12
CDH1	ENSG00000039068	protein_coding	22279.5	-0.0581683	0.0669486	-0.868849	0.38493	0.502544
MTREX	ENSG00000039123	protein_coding	2968.82	0.0109211	0.0440167	0.248114	0.804046	0.861859
DNAH5	ENSG00000039139	protein_coding	1719.34	0.298103	0.114654	2.60004	0.00932138	0.0226603
ZFYVE16	ENSG00000039319	protein_coding	2139.97	0.123614	0.0501595	2.46441	0.013724	0.0316151
RIPOR1	ENSG00000039523	protein_coding	2598.77	0.269252	0.0636039	4.23326	2.30327e-05	0.000113584
C6	ENSG00000039537	protein_coding	177.771	1.65053	0.18069	9.1346	6.56488e-20	3.79974e-18
RAI14	ENSG00000039560	protein_coding	7043.95	0.00231329	0.0737425	0.0313698	0.974975	0.983297
SOX30	ENSG00000039600	protein_coding	42.6086	0.0723549	0.157928	0.458152	0.646843	0.739035
PNKP	ENSG00000039650	protein_coding	1515.97	-0.281765	0.0488107	-5.77261	7.8053e-09	7.9862e-08
BEST2	ENSG00000039987	protein_coding	1.73509	-0.218626	0.195998	-1.11545	0.264658	0.374827
PHLPP2	ENSG00000040199	protein_coding	478.126	-0.0030497	0.0591407	-0.0515667	0.958874	0.972483
SPDL1	ENSG00000040275	protein_coding	589.975	-0.357518	0.0613522	-5.8273	5.63311e-09	5.89871e-08
STAU2	ENSG00000040341	protein_coding	2872.44	-0.307107	0.0586478	-5.23646	1.63686e-07	1.2874e-06
SLC66A1	ENSG00000040487	protein_coding	946.17	-0.262144	0.051923	-5.04871	4.44807e-07	3.19418e-06
CTNS	ENSG00000040531	protein_coding	1053.55	-0.0308126	0.0464322	-0.663603	0.506944	0.619403
RTN4R	ENSG00000040608	protein_coding	354.693	-0.107432	0.0910342	-1.18013	0.237949	0.344173
PHF23	ENSG00000040633	protein_coding	1803.01	-0.16094	0.0437222	-3.68096	0.000232353	0.000886862
CDH10	ENSG00000040731	protein_coding	8.571	0.734932	0.19174	3.83296	0.000126612	0.00051978
INPP4A	ENSG00000040933	protein_coding	2029.97	0.0762415	0.0428236	1.78036	0.0750167	0.133656
RAB27B	ENSG00000041353	protein_coding	2872.83	0.240603	0.117986	2.03925	0.0414248	0.0811793
PSMA4	ENSG00000041357	protein_coding	5561.9	-0.329121	0.0499302	-6.59161	4.35073e-11	6.52189e-10
MYO16	ENSG00000041515	protein_coding	107.479	-0.833697	0.150816	-5.52789	3.24098e-08	2.95485e-07
LSG1	ENSG00000041802	protein_coding	2300.18	-0.310413	0.0490011	-6.33483	2.3761e-10	3.15012e-09
PARP3	ENSG00000041880	protein_coding	1333.91	0.0393447	0.055819	0.704862	0.480896	0.594995
TNC	ENSG00000041982	protein_coding	16576.2	0.0440344	0.138674	0.31754	0.750834	0.821808
THAP3	ENSG00000041988	protein_coding	627.635	-0.177748	0.0516306	-3.44268	0.000575975	0.00198544
RIPOR3	ENSG00000042062	protein_coding	134.769	0.0526337	0.0936614	0.561958	0.574145	0.678747
TDP1	ENSG00000042088	protein_coding	760.22	-0.226489	0.0673637	-3.36218	0.000773285	0.0025731
AIFM2	ENSG00000042286	protein_coding	1580.03	-0.465542	0.0703435	-6.61812	3.63808e-11	5.52815e-10
C2orf83	ENSG00000042304	protein_coding	0.674204	-1.3933	0.264273	-5.27222	1.34781e-07	1.07885e-06
SPATA7	ENSG00000042317	protein_coding	416.707	0.0687442	0.0495188	1.38824	0.165062	0.256076
MED17	ENSG00000042429	protein_coding	1433.31	-0.0810541	0.0343986	-2.35632	0.0184569	0.0408194
RETSAT	ENSG00000042445	protein_coding	3543.91	0.0405147	0.057143	0.709005	0.478321	0.592463
CAPG	ENSG00000042493	protein_coding	10681.2	0.167143	0.074411	2.24622	0.0246902	0.0522999
AP2S1	ENSG00000042753	protein_coding	3228.56	-0.16351	0.0552439	-2.95979	0.00307853	0.00862759
USH2A	ENSG00000042781	protein_coding	12.79	-0.0265477	0.14176	-0.187273	0.851447	0.896231
ZPBP	ENSG00000042813	protein_coding	1.4775	0.71147	0.225403	3.15643	0.00159711	0.00488038
TG	ENSG00000042832	protein_coding	56.6775	-0.324376	0.121606	-2.66743	0.00764334	0.0190987
ADAM28	ENSG00000042980	protein_coding	1866.85	0.115604	0.10958	1.05497	0.29144	0.404459
BARX2	ENSG00000043039	protein_coding	518.866	0.0643655	0.150353	0.428097	0.668581	0.757047
DCUN1D1	ENSG00000043093	protein_coding	1860.39	-0.163865	0.0522196	-3.13799	0.00170109	0.00516028
JADE2	ENSG00000043143	protein_coding	2894.38	0.265847	0.0592125	4.48971	7.13209e-06	3.93873e-05
ZIC2	ENSG00000043355	protein_coding	92.1937	-0.480279	0.229411	-2.09353	0.0363016	0.0725863
LCP2	ENSG00000043462	protein_coding	1999.38	0.336035	0.0764535	4.39529	1.10626e-05	5.8737e-05
TRIT1	ENSG00000043514	protein_coding	1135.59	-0.37789	0.0511468	-7.38835	1.48665e-13	3.40821e-12
ADRB1	ENSG00000043591	protein_coding	181.037	0.845256	0.147119	5.7454	9.17059e-09	9.26289e-08
GUCA2B	ENSG00000044012	protein_coding	5.44309	-2.24615	0.365448	-6.14629	7.9318e-10	9.69164e-09
CUL7	ENSG00000044090	protein_coding	3422.66	-0.199598	0.0525441	-3.79868	0.000145469	0.000587296
CTNNA1	ENSG00000044115	protein_coding	23417.6	-0.0441309	0.0452098	-0.976136	0.328997	0.444736
PHKA2	ENSG00000044446	protein_coding	1374.27	-0.010363	0.0440823	-0.235082	0.814145	0.869223
CNTLN	ENSG00000044459	protein_coding	347.139	0.264699	0.0850368	3.11276	0.00185346	0.00556756
EPHA3	ENSG00000044524	protein_coding	395.179	0.861601	0.138596	6.21664	5.07918e-10	6.3898e-09
HSPA5	ENSG00000044574	protein_coding	45960.6	-0.217034	0.0505432	-4.29403	1.75461e-05	8.88101e-05
DSG2	ENSG00000046604	protein_coding	10111.4	-0.119335	0.0882547	-1.35217	0.176322	0.270151
GEMIN8	ENSG00000046647	protein_coding	693.582	-0.121908	0.046271	-2.63465	0.0084223	0.0207474
OFD1	ENSG00000046651	protein_coding	1858.93	-0.0991119	0.0500288	-1.9811	0.0475803	0.0912417
GPM6B	ENSG00000046653	protein_coding	443.085	0.575031	0.0957545	6.00526	1.91023e-09	2.18387e-08
MAGEC2	ENSG00000046774	protein_coding	62.1345	-0.514376	0.412052	-1.24833	0.211911	0.313103
PREX2	ENSG00000046889	protein_coding	431.145	1.2725	0.101708	12.5112	6.48362e-36	1.47161e-33
WDR37	ENSG00000047056	protein_coding	1059.73	0.101865	0.0432505	2.35524	0.0185109	0.0409181
YTHDC2	ENSG00000047188	protein_coding	1448.63	0.174373	0.0473151	3.68536	0.000228383	0.000873227
CTPS2	ENSG00000047230	protein_coding	1550.05	-0.186985	0.0483228	-3.86949	0.000109064	0.000456294
ATP6V1H	ENSG00000047249	protein_coding	2663.36	-0.139483	0.0437202	-3.19035	0.00142101	0.00440466
POLR2B	ENSG00000047315	protein_coding	4887.15	-0.162152	0.0391909	-4.13749	3.51125e-05	0.000166634
FAM214A	ENSG00000047346	protein_coding	2289.5	0.18358	0.0598769	3.06596	0.00216974	0.00637193
ARAP2	ENSG00000047365	protein_coding	1477.09	0.212578	0.0765785	2.77594	0.00550421	0.0143428
TPR	ENSG00000047410	protein_coding	7461.47	-0.0613983	0.0462873	-1.32646	0.184687	0.280341
CP	ENSG00000047457	protein_coding	19192.1	-0.968536	0.137424	-7.04779	1.81784e-12	3.43985e-11
KIAA0556	ENSG00000047578	protein_coding	1446.59	0.117036	0.0484608	2.41506	0.0157328	0.0355399
DTNBP1	ENSG00000047579	protein_coding	939.923	-0.032191	0.0375804	-0.856591	0.391671	0.509229
XK	ENSG00000047597	protein_coding	375.816	-0.197163	0.132277	-1.49053	0.136086	0.218374
ANO2	ENSG00000047617	protein_coding	38.3142	1.01867	0.102422	9.94576	2.63161e-23	2.23697e-21
C12orf4	ENSG00000047621	protein_coding	890.619	-0.011027	0.0472885	-0.233186	0.815617	0.870216
SCML1	ENSG00000047634	protein_coding	454.805	-0.090552	0.0801327	-1.13002	0.258466	0.367807
WWC3	ENSG00000047644	protein_coding	3791.87	0.0610543	0.0627698	0.97267	0.330717	0.446644
ARHGAP6	ENSG00000047648	protein_coding	206.482	1.16868	0.0718766	16.2595	1.91206e-59	1.65784e-56
FAM184B	ENSG00000047662	protein_coding	40.2211	0.0167388	0.108956	0.153628	0.877903	0.914656
MAP4	ENSG00000047849	protein_coding	11049.4	0.155416	0.0431031	3.60568	0.000311331	0.00115219
GOPC	ENSG00000047932	protein_coding	1946.49	0.108164	0.0377513	2.86518	0.0041677	0.0112474
ROS1	ENSG00000047936	protein_coding	3919.39	0.799379	0.140402	5.69349	1.24469e-08	1.22747e-07
USP28	ENSG00000048028	protein_coding	1546.41	-0.199839	0.0540777	-3.6954	0.000219544	0.000843317
HDAC9	ENSG00000048052	protein_coding	711.241	0.505844	0.118558	4.26662	1.98455e-05	9.93124e-05
TSPAN17	ENSG00000048140	protein_coding	2938.28	-0.0372253	0.0510225	-0.729587	0.465643	0.580507
NOP16	ENSG00000048162	protein_coding	876.728	-0.399339	0.0593275	-6.7311	1.68381e-11	2.71464e-10
CC2D2A	ENSG00000048342	protein_coding	814.603	0.505799	0.0689656	7.33407	2.23259e-13	4.97621e-12
RRM2B	ENSG00000048392	protein_coding	2803.55	0.366693	0.0616789	5.9452	2.76125e-09	3.0584e-08
ZNF800	ENSG00000048405	protein_coding	1146.65	-0.0124795	0.0492025	-0.253636	0.799777	0.858933
TNFRSF17	ENSG00000048462	protein_coding	194.62	-0.0608933	0.133423	-0.456394	0.648107	0.740106
SNX29	ENSG00000048471	protein_coding	1606.56	0.417229	0.0492637	8.46932	2.46839e-17	1.02402e-15
LMO3	ENSG00000048540	protein_coding	5776.27	0.333019	0.132977	2.50435	0.0122678	0.0287121
MRPS10	ENSG00000048544	protein_coding	2540.48	-0.273498	0.0521754	-5.2419	1.58929e-07	1.25316e-06
GUCA1A	ENSG00000048545	protein_coding	14.8842	-0.340182	0.176103	-1.93172	0.0533936	0.100422
RSF1	ENSG00000048649	protein_coding	2910.53	0.00421675	0.0507657	0.083063	0.933801	0.954858
VPS13D	ENSG00000048707	protein_coding	3614.75	0.377706	0.0605511	6.23781	4.43731e-10	5.65118e-09
CELF2	ENSG00000048740	protein_coding	3659.95	0.58488	0.0790986	7.39431	1.42147e-13	3.26914e-12
FAM120A	ENSG00000048828	protein_coding	10983.1	-0.0748817	0.0407789	-1.83629	0.0663153	0.12048
R3HDM1	ENSG00000048991	protein_coding	1591.54	-0.229086	0.0454853	-5.03648	4.74172e-07	3.38375e-06
COL9A2	ENSG00000049089	protein_coding	1465.87	-0.0181682	0.131352	-0.138317	0.88999	0.923781
KITLG	ENSG00000049130	protein_coding	4771.85	0.0151258	0.0876538	0.172563	0.862995	0.904316
ERCC8	ENSG00000049167	protein_coding	384.179	-0.0329506	0.0476878	-0.690966	0.489587	0.60328
ADAMTS6	ENSG00000049192	protein_coding	120.895	0.147468	0.109793	1.34315	0.179224	0.273785
H6PD	ENSG00000049239	protein_coding	6371.47	0.0556254	0.0589252	0.944001	0.345169	0.461631
VAMP3	ENSG00000049245	protein_coding	5309.76	0.174384	0.0370786	4.70308	2.56261e-06	1.55878e-05
PER3	ENSG00000049246	protein_coding	1315.15	0.39038	0.0920147	4.24258	2.20966e-05	0.000109428
UTS2	ENSG00000049247	protein_coding	21.9496	0.0114222	0.166816	0.0684722	0.94541	0.963139
TNFRSF9	ENSG00000049249	protein_coding	370.962	-0.172382	0.113853	-1.51407	0.130008	0.210263
EPN3	ENSG00000049283	protein_coding	969.305	-0.589212	0.0974956	-6.04348	1.50827e-09	1.76007e-08
LTBP1	ENSG00000049323	protein_coding	4089.93	0.628018	0.0825098	7.61143	2.7107e-14	6.95761e-13
RCN1	ENSG00000049449	protein_coding	6323.1	-0.227523	0.0608113	-3.74145	0.000182958	0.000717858
ELN	ENSG00000049540	protein_coding	5080.76	1.41566	0.105901	13.3678	9.32698e-41	2.86768e-38
RFC2	ENSG00000049541	protein_coding	1594.84	-0.444692	0.0564805	-7.87336	3.45235e-15	1.04225e-13
ARID1B	ENSG00000049618	protein_coding	3518.26	0.148077	0.0415239	3.56607	0.000362379	0.00131894
CLPTM1L	ENSG00000049656	protein_coding	13703.6	0.0308944	0.0669823	0.461232	0.644632	0.737441
NEDD4L	ENSG00000049759	protein_coding	5613.28	0.189158	0.079724	2.37266	0.0176606	0.0393171
FOXP3	ENSG00000049768	protein_coding	284.763	0.291028	0.085815	3.39135	0.000695502	0.00234386
PPP1R3F	ENSG00000049769	protein_coding	275.927	-0.17422	0.0786274	-2.21577	0.0267075	0.0559065
HEXB	ENSG00000049860	protein_coding	6816.71	0.132572	0.0514135	2.57854	0.00992181	0.0238988
PTCD2	ENSG00000049883	protein_coding	474.941	0.10019	0.0448708	2.23286	0.0255584	0.0538522
NEXMIF	ENSG00000050030	protein_coding	135.829	0.159884	0.164575	0.971495	0.331302	0.447225
JKAMP	ENSG00000050130	protein_coding	2112.83	-0.0179272	0.0384116	-0.466715	0.640704	0.734243
DKK3	ENSG00000050165	protein_coding	3796.98	0.982329	0.0813917	12.0692	1.53682e-33	3.04221e-31
ARHGEF5	ENSG00000050327	protein_coding	932.995	-0.22628	0.0551172	-4.10543	4.03566e-05	0.00018867
NFE2L3	ENSG00000050344	protein_coding	2314.59	0.156357	0.0900257	1.7368	0.0824217	0.144422
MCUR1	ENSG00000050393	protein_coding	2175.49	-0.113949	0.0441661	-2.58001	0.00987972	0.0238117
LIMA1	ENSG00000050405	protein_coding	4693.88	0.0686328	0.0625838	1.09665	0.272792	0.383852
LETMD1	ENSG00000050426	protein_coding	2521.05	-0.160272	0.0490506	-3.26749	0.00108506	0.00348414
SLC4A8	ENSG00000050438	protein_coding	447.171	-0.292255	0.124143	-2.35417	0.0185639	0.0410143
LAMC3	ENSG00000050555	protein_coding	836.826	0.764788	0.102809	7.43893	1.01503e-13	2.41512e-12
PTGER3	ENSG00000050628	protein_coding	139.72	0.11281	0.146521	0.769922	0.441346	0.557414
TNIP3	ENSG00000050730	protein_coding	203.401	-0.28307	0.144779	-1.95519	0.0505603	0.0959223
MAPK9	ENSG00000050748	protein_coding	2779.34	-0.0104906	0.0490346	-0.213943	0.830591	0.880752
COL23A1	ENSG00000050767	protein_coding	97.3311	0.523961	0.116234	4.50782	6.54979e-06	3.64923e-05
BCAR1	ENSG00000050820	protein_coding	3776.03	-0.0566824	0.0641286	-0.883886	0.376758	0.493898
FAM160A2	ENSG00000051009	protein_coding	1784.51	0.00593418	0.0437504	0.135637	0.892108	0.925032
HERPUD1	ENSG00000051108	protein_coding	7921.57	0.063926	0.0557016	1.14765	0.251113	0.359175
HOMER3	ENSG00000051128	protein_coding	1207.47	-0.192807	0.0768959	-2.50737	0.0121633	0.0285122
RAD51	ENSG00000051180	protein_coding	339.458	-0.685122	0.0856936	-7.99502	1.2955e-15	4.16327e-14
POLQ	ENSG00000051341	protein_coding	326.575	-0.903235	0.102926	-8.7756	1.69997e-18	8.27129e-17
PIK3CB	ENSG00000051382	protein_coding	2300.62	-0.0230351	0.0557754	-0.412997	0.679609	0.765703
CYBA	ENSG00000051523	protein_coding	7654.73	-0.260718	0.0835984	-3.11869	0.00181654	0.00546956
THOC3	ENSG00000051596	protein_coding	425.499	-0.36861	0.0626164	-5.8868	3.93747e-09	4.24514e-08
HEBP2	ENSG00000051620	protein_coding	2919.72	-0.260597	0.0564746	-4.6144	3.94225e-06	2.30374e-05
MPHOSPH9	ENSG00000051825	protein_coding	794.956	-0.338866	0.0669705	-5.05993	4.1942e-07	3.02592e-06
PLEKHA5	ENSG00000052126	protein_coding	2205.55	-0.0933826	0.0697009	-1.33976	0.180323	0.275114
PRSS8	ENSG00000052344	protein_coding	11987.8	-0.244188	0.0849078	-2.87592	0.00402856	0.0109181
SIKE1	ENSG00000052723	protein_coding	1794.12	-0.0660603	0.0473874	-1.39405	0.163304	0.253902
RRP12	ENSG00000052749	protein_coding	2484.03	-0.279089	0.0558515	-4.99699	5.82319e-07	4.0849e-06
FNIP2	ENSG00000052795	protein_coding	3704.79	0.261964	0.0847394	3.0914	0.00199212	0.00592621
MSMO1	ENSG00000052802	protein_coding	3875.43	-0.228875	0.0684251	-3.34489	0.000823149	0.00272427
TTC17	ENSG00000052841	protein_coding	4064.29	-0.0388257	0.0413984	-0.937855	0.348319	0.464818
ALX4	ENSG00000052850	protein_coding	11.4423	0.747698	0.206642	3.61832	0.000296523	0.00110351
FSTL4	ENSG00000053108	protein_coding	971.416	-0.51801	0.18633	-2.78007	0.00543469	0.0141777
FOXN3	ENSG00000053254	protein_coding	2840.74	0.473554	0.0569978	8.30829	9.70933e-17	3.70527e-15
METTL24	ENSG00000053328	protein_coding	26.7679	0.865345	0.103906	8.32817	8.21001e-17	3.15851e-15
AKR7A2	ENSG00000053371	protein_coding	1983.08	-0.0287871	0.050021	-0.5755	0.564953	0.670955
MRTO4	ENSG00000053372	protein_coding	2244.44	-0.371791	0.0539146	-6.89593	5.35147e-12	9.35472e-11
NNAT	ENSG00000053438	protein_coding	44.9686	0.114019	0.108086	1.05489	0.291477	0.404497
USE1	ENSG00000053501	protein_coding	807.509	-0.188819	0.0548357	-3.44337	0.000574519	0.0019819
MCF2L2	ENSG00000053524	protein_coding	88.4379	-0.253476	0.0987099	-2.56789	0.0102321	0.0245405
NRIP2	ENSG00000053702	protein_coding	147.807	0.453575	0.0585582	7.74571	9.50521e-15	2.63472e-13
LAMA3	ENSG00000053747	protein_coding	5053.93	0.24083	0.149996	1.60557	0.108368	0.180928
AP5M1	ENSG00000053770	protein_coding	1787.88	-0.0244652	0.0393337	-0.621991	0.533948	0.643967
ANAPC4	ENSG00000053900	protein_coding	1397.25	-0.0634363	0.0421411	-1.50533	0.132239	0.21321
KCNQ1	ENSG00000053918	protein_coding	2087.54	0.0826273	0.115476	0.715536	0.474278	0.588631
TRAPPC3	ENSG00000054116	protein_coding	2941.39	-0.0990116	0.0430046	-2.30235	0.0213155	0.0462082
THRAP3	ENSG00000054118	protein_coding	7352.33	-0.0195584	0.0309251	-0.632443	0.527098	0.637879
PHPT1	ENSG00000054148	protein_coding	3589.37	-0.379025	0.0746901	-5.07464	3.88234e-07	2.81544e-06
ENTPD2	ENSG00000054179	protein_coding	211.302	-0.526172	0.140449	-3.74636	0.000179419	0.000705437
LY75	ENSG00000054219	protein_coding	799.106	0.0772737	0.0824138	0.93763	0.348435	0.464937
ARID4B	ENSG00000054267	protein_coding	2823.47	0.0317542	0.043523	0.729595	0.465638	0.580507
OPN3	ENSG00000054277	protein_coding	1146.44	-0.594603	0.114461	-5.19481	2.04932e-07	1.57661e-06
SDCCAG8	ENSG00000054282	protein_coding	1452.29	0.0203466	0.0456292	0.445912	0.655661	0.746183
PTPRN	ENSG00000054356	protein_coding	113.368	-0.859157	0.190223	-4.51659	6.28449e-06	3.51044e-05
HHAT	ENSG00000054392	protein_coding	679.588	0.290138	0.0728895	3.98052	6.8766e-05	0.000302931
KIF1B	ENSG00000054523	protein_coding	3599.47	0.00139407	0.0517946	0.0269153	0.978527	0.985479
FOXC1	ENSG00000054598	protein_coding	663.149	-0.0194154	0.11169	-0.173833	0.861997	0.903513
TBC1D22A	ENSG00000054611	protein_coding	1885.48	0.0587061	0.041268	1.42256	0.154865	0.242977
SYNE2	ENSG00000054654	protein_coding	6997.02	0.13027	0.0761363	1.71101	0.087079	0.15108
PLEKHH1	ENSG00000054690	protein_coding	435.213	-0.741075	0.128052	-5.78732	7.15188e-09	7.36107e-08
ATP9A	ENSG00000054793	protein_coding	5092.67	0.12995	0.0664499	1.95561	0.050511	0.0958443
SPO11	ENSG00000054796	protein_coding	0.105062	-0.169122	0.715969	-0.236214	0.813266
CBLN4	ENSG00000054803	protein_coding	36.6551	1.58214	0.137135	11.5371	8.5749e-31	1.42429e-28
CHRDL2	ENSG00000054938	protein_coding	207.849	-0.285516	0.146312	-1.95142	0.0510073	0.0966168
FAM168A	ENSG00000054965	protein_coding	3073.56	-0.0125215	0.0496599	-0.252144	0.80093	0.85973
RELT	ENSG00000054967	protein_coding	602.241	0.0024458	0.065005	0.0376247	0.969987	0.979875
GALC	ENSG00000054983	protein_coding	2043.74	0.207845	0.0559254	3.71646	0.000202032	0.000783687
NOP58	ENSG00000055044	protein_coding	3499.77	-0.322158	0.0400333	-8.04725	8.46726e-16	2.79516e-14
SZRD1	ENSG00000055070	protein_coding	6297.62	-0.0464051	0.0395769	-1.17253	0.240985	0.34766
KCNH2	ENSG00000055118	protein_coding	551.364	-0.732529	0.160149	-4.57406	4.78369e-06	2.74897e-05
CUL1	ENSG00000055130	protein_coding	3358.25	-0.139614	0.0317583	-4.39616	1.10183e-05	5.85301e-05
FAM114A2	ENSG00000055147	protein_coding	1009.92	0.198324	0.0407808	4.86317	1.1552e-06	7.57761e-06
CYFIP2	ENSG00000055163	protein_coding	2365.55	0.36763	0.0821867	4.47311	7.70914e-06	4.21659e-05
TAB2	ENSG00000055208	protein_coding	4148.56	0.0839602	0.0421475	1.99206	0.0463647	0.0892899
GINM1	ENSG00000055211	protein_coding	2202.54	0.168258	0.0440792	3.81716	0.000134995	0.000550389
EIF2AK2	ENSG00000055332	protein_coding	4360.24	0.0100275	0.0519292	0.1931	0.84688	0.892689
USP36	ENSG00000055483	protein_coding	2890.32	-0.109053	0.0398388	-2.73735	0.00619372	0.0159315
KMT2C	ENSG00000055609	protein_coding	4971.39	0.0584196	0.0662237	0.882156	0.377693	0.494854
MCOLN3	ENSG00000055732	protein_coding	276.321	0.100684	0.138521	0.726852	0.467317	0.582008
CCDC85A	ENSG00000055813	protein_coding	57.3126	0.762577	0.114208	6.67707	2.43761e-11	3.82189e-10
PUM2	ENSG00000055917	protein_coding	7053.99	0.0112507	0.0322137	0.349251	0.726901	0.803237
MRPL43	ENSG00000055950	protein_coding	2544.25	-0.180481	0.0542641	-3.32598	0.000881084	0.00289567
ITIH4	ENSG00000055955	protein_coding	41.6987	-0.520338	0.119213	-4.3648	1.27241e-05	6.66124e-05
ITIH1	ENSG00000055957	protein_coding	7.42514	0.358146	0.139483	2.56767	0.0102384	0.0245522
HPF1	ENSG00000056050	protein_coding	750.218	-0.00101866	0.0473749	-0.0215021	0.982845	0.988224
ZFR	ENSG00000056097	protein_coding	4562.29	-0.0429	0.0361635	-1.18628	0.235513	0.341287
ZNF280C	ENSG00000056277	protein_coding	356.442	-0.168748	0.0539642	-3.12704	0.00176576	0.00533666
NPFFR2	ENSG00000056291	protein_coding	34.8603	-0.0463542	0.269	-0.17232	0.863186	0.904431
PHF21B	ENSG00000056487	protein_coding	10.1453	0.154082	0.184534	0.83498	0.403729	0.520971
TRAF1	ENSG00000056558	protein_coding	1132.9	0.219861	0.0729774	3.01273	0.00258911	0.00744318
RC3H2	ENSG00000056586	protein_coding	2493.01	0.0466735	0.0527968	0.884023	0.376684	0.493831
IL17RB	ENSG00000056736	protein_coding	508.039	-0.173625	0.0961287	-1.80618	0.0708906	0.127362
TRAF3IP2	ENSG00000056972	protein_coding	1109.23	0.219184	0.0479295	4.57306	4.80655e-06	2.76138e-05
GYG2	ENSG00000056998	protein_coding	624.747	-0.334084	0.0993961	-3.36114	0.000776225	0.00258138
DCBLD2	ENSG00000057019	protein_coding	6980.96	-0.190687	0.119771	-1.59209	0.111364	0.18509
SERPINB3	ENSG00000057149	protein_coding	237.669	0.115901	0.275136	0.421248	0.673574	0.760992
SOAT1	ENSG00000057252	protein_coding	4896.14	-0.0143354	0.0500407	-0.286474	0.774515	0.839461
PKP2	ENSG00000057294	protein_coding	1003.59	-0.228503	0.14835	-1.5403	0.123486	0.201573
MSH4	ENSG00000057468	protein_coding	9.00067	-0.258579	0.134036	-1.92917	0.0537102	0.100932
F7	ENSG00000057593	protein_coding	55.742	-1.53133	0.198223	-7.72528	1.11607e-14	3.05645e-13
GDI2	ENSG00000057608	protein_coding	12939.9	-0.149477	0.0448997	-3.32913	0.000871186	0.00286574
PRDM1	ENSG00000057657	protein_coding	1546.89	0.184633	0.0787711	2.34391	0.0190825	0.0419826
ATG5	ENSG00000057663	protein_coding	1861.65	-0.0345277	0.0469895	-0.734796	0.462464	0.57764
TMCC3	ENSG00000057704	protein_coding	734.578	0.228685	0.0818236	2.79486	0.00519227	0.0136116
PITHD1	ENSG00000057757	protein_coding	2106.13	-0.0563972	0.0370684	-1.52144	0.12815	0.207809
MTA3	ENSG00000057935	protein_coding	2174.76	-0.337633	0.0437347	-7.72001	1.16316e-14	3.17541e-13
USP13	ENSG00000058056	protein_coding	1549.42	0.120844	0.0687837	1.75686	0.0789409	0.139393
ATP11B	ENSG00000058063	protein_coding	3159.22	0.0358757	0.0609742	0.588376	0.55628	0.663325
LAMC2	ENSG00000058085	protein_coding	15879.2	-0.100099	0.136364	-0.734057	0.462914	0.578069
CDK14	ENSG00000058091	protein_coding	1082.41	0.413174	0.0819715	5.04045	4.64435e-07	3.32357e-06
SEC61A1	ENSG00000058262	protein_coding	22672.4	-0.273432	0.0404898	-6.75311	1.44707e-11	2.35752e-10
PPP1R12A	ENSG00000058272	protein_coding	3126.79	-0.0261789	0.0494239	-0.529682	0.596332	0.697781
RASGRF1	ENSG00000058335	protein_coding	866.172	1.12673	0.157258	7.16483	7.78834e-13	1.57923e-11
CAMK2B	ENSG00000058404	protein_coding	131.198	-1.19865	0.192772	-6.21794	5.03714e-10	6.34797e-09
CROCC	ENSG00000058453	protein_coding	1216.59	0.236366	0.0730574	3.23535	0.00121492	0.00384447
POLR3E	ENSG00000058600	protein_coding	2054.96	-0.141774	0.0395102	-3.5883	0.000332846	0.00122398
ATP2B4	ENSG00000058668	protein_coding	9167.97	0.0571686	0.0726177	0.787254	0.431133	0.547546
ZC3H11A	ENSG00000058673	protein_coding	6992.45	-0.0613347	0.0468865	-1.30815	0.190822	0.28784
RIOK2	ENSG00000058729	protein_coding	983.325	0.0744557	0.0382627	1.94591	0.0516658	0.0977019
YIPF1	ENSG00000058799	protein_coding	1981.39	-0.135229	0.0421517	-3.20815	0.00133592	0.00417465
NDC1	ENSG00000058804	protein_coding	1777.73	-0.384196	0.0601411	-6.38825	1.67793e-10	2.28389e-09
DGKG	ENSG00000058866	protein_coding	244.465	-0.256728	0.0994961	-2.58028	0.00987204	0.0238027
FLYWCH1	ENSG00000059122	protein_coding	1562.36	0.0709456	0.0527832	1.34409	0.178918	0.273384
UNKL	ENSG00000059145	protein_coding	756.815	-0.0589155	0.0591081	-0.996742	0.31889	0.434201
TBXAS1	ENSG00000059377	protein_coding	1452.35	0.0560779	0.076582	0.732259	0.464011	0.579038
PARP12	ENSG00000059378	protein_coding	2841.54	-0.136597	0.0537369	-2.54197	0.0110231	0.0261992
ALDH18A1	ENSG00000059573	protein_coding	5435.45	-0.3338	0.0497509	-6.70943	1.95382e-11	3.10718e-10
TARBP1	ENSG00000059588	protein_coding	2438.34	-0.146622	0.0647227	-2.26538	0.0234893	0.0501062
GATB	ENSG00000059691	protein_coding	840.39	-0.113198	0.0482681	-2.34519	0.0190174	0.0418614
MXD1	ENSG00000059728	protein_coding	1634.99	-0.123737	0.082729	-1.4957	0.134733	0.216604
CDK17	ENSG00000059758	protein_coding	1647.25	0.0731519	0.0470062	1.55622	0.119656	0.196341
DNAJC25	ENSG00000059769	protein_coding	500.663	-0.272626	0.0407706	-6.68682	2.28073e-11	3.59412e-10
SLC2A3	ENSG00000059804	protein_coding	3231.22	0.0948848	0.106123	0.8941	0.371269	0.488297
PSD	ENSG00000059915	protein_coding	249.874	0.158106	0.0769172	2.05554	0.0398268	0.0785734
CTDP1	ENSG00000060069	protein_coding	1262.59	-0.0331135	0.0446824	-0.741085	0.458642	0.57419
YBX3	ENSG00000060138	protein_coding	8038.13	-0.078732	0.0568614	-1.38463	0.166166	0.257557
STYK1	ENSG00000060140	protein_coding	497.633	-0.357506	0.102586	-3.48493	0.000492269	0.00172521
WNK1	ENSG00000060237	protein_coding	13367.7	0.125048	0.0640657	1.95187	0.0509542	0.0965414
RPS17P5	ENSG00000060303	processed_pseudogene	1.67536	-0.24236	0.16246	-1.49182	0.135747	0.217919
CCAR1	ENSG00000060339	protein_coding	3488.52	-0.249575	0.0339336	-7.3548	1.91206e-13	4.31728e-12
OGFR	ENSG00000060491	protein_coding	2592.58	-0.109471	0.0546173	-2.00432	0.0450355	0.0871402
GNA15	ENSG00000060558	protein_coding	1489.26	-0.0472783	0.0760314	-0.621826	0.534056	0.644045
CREB3L3	ENSG00000060566	protein_coding	5.24997	-0.339358	0.175148	-1.93755	0.0526781	0.0993
PIGV	ENSG00000060642	protein_coding	951.867	-0.0155997	0.0487464	-0.320018	0.748955	0.820206
PTPRU	ENSG00000060656	protein_coding	4051.28	0.4299	0.0958396	4.48562	7.27032e-06	4.00792e-05
SNRNP40	ENSG00000060688	protein_coding	1907.69	-0.108188	0.0429735	-2.51755	0.0118174	0.0278051
RIMBP2	ENSG00000060709	protein_coding	150.077	-1.27925	0.224734	-5.69228	1.25356e-08	1.2351e-07
COL11A1	ENSG00000060718	protein_coding	3554.09	0.207857	0.189996	1.09401	0.273952	0.385222
QSER1	ENSG00000060749	protein_coding	1953.1	0.00223607	0.0564038	0.0396439	0.968377	0.97874
MPC1	ENSG00000060762	protein_coding	1468.02	0.0630155	0.0619108	1.01784	0.308752	0.423258
ACAA1	ENSG00000060971	protein_coding	2208.57	0.0834968	0.0531222	1.57179	0.116	0.191421
BCAT1	ENSG00000060982	protein_coding	4645.26	0.372969	0.124281	3.00101	0.00269083	0.00769071
HDAC7	ENSG00000061273	protein_coding	4826.9	0.0666593	0.0483577	1.37846	0.16806	0.259936
LZTS1	ENSG00000061337	protein_coding	527.709	0.411104	0.0811611	5.06529	4.07786e-07	2.94786e-06
PRDM6	ENSG00000061455	protein_coding	333.214	1.08029	0.0850214	12.706	5.47383e-37	1.32571e-34
WNT8A	ENSG00000061492	protein_coding	0.284281	0.0111978	0.303073	0.0369475	0.970527	0.980194
SPAG4	ENSG00000061656	protein_coding	781.479	-0.784003	0.0864661	-9.06717	1.2215e-19	6.84168e-18
NCKAP1	ENSG00000061676	protein_coding	9947.73	-0.170655	0.0454234	-3.75697	0.000171982	0.000680331
MRPS35	ENSG00000061794	protein_coding	3527.69	-0.44019	0.0663043	-6.63894	3.15942e-11	4.857e-10
GUCY1B1	ENSG00000061918	protein_coding	885.678	0.144923	0.0694737	2.08601	0.036978	0.0737594
SFSWAP	ENSG00000061936	protein_coding	2032.37	-0.195682	0.0405598	-4.82453	1.40335e-06	9.03712e-06
TNK2	ENSG00000061938	protein_coding	2565.27	-0.143778	0.063286	-2.27188	0.0230936	0.0494153
MON2	ENSG00000061987	protein_coding	2399.95	0.0146836	0.057376	0.255919	0.798013	0.857618
CDH3	ENSG00000062038	protein_coding	6101.75	-0.246998	0.1326	-1.86274	0.0624995	0.11458
ARSF	ENSG00000062096	protein_coding	1.88702	0.261234	0.144499	1.80787	0.0706273	0.127
GPBP1	ENSG00000062194	protein_coding	4283.76	0.0278385	0.0341366	0.815502	0.414785	0.531688
DGAT2	ENSG00000062282	protein_coding	740.279	-0.276502	0.0941866	-2.93568	0.00332815	0.00923523
ZNF112	ENSG00000062370	protein_coding	183.226	0.101399	0.0558196	1.81655	0.0692866	0.125009
CS	ENSG00000062485	protein_coding	7804.2	-0.214971	0.0440909	-4.87563	1.08463e-06	7.1591e-06
LTK	ENSG00000062524	protein_coding	515.057	-0.317408	0.144698	-2.19359	0.0282652	0.058663
MRPS24	ENSG00000062582	protein_coding	492.388	-0.427773	0.0741389	-5.76989	7.93236e-09	8.09752e-08
ELMO2	ENSG00000062598	protein_coding	2329.57	0.0327285	0.0373976	0.875148	0.381493	0.498779
WAPL	ENSG00000062650	protein_coding	2988.91	0.0702503	0.040207	1.74722	0.0805998	0.141797
VMP1	ENSG00000062716	protein_coding	13926.3	-0.131335	0.0702329	-1.87	0.0614841	0.113034
APPBP2	ENSG00000062725	protein_coding	2312.67	0.098242	0.0395229	2.4857	0.0129297	0.0300247
POLD1	ENSG00000062822	protein_coding	1533.69	-0.317942	0.0584148	-5.44283	5.24401e-08	4.5779e-07
SEZ6	ENSG00000063015	protein_coding	15.4939	0.10879	0.183246	0.593683	0.552724	0.660283
EIF4B	ENSG00000063046	protein_coding	15260.8	-0.025621	0.0479532	-0.534291	0.59314	0.695004
SLC6A16	ENSG00000063127	protein_coding	109.574	0.194701	0.0935326	2.08164	0.0373758	0.0744562
BICRA	ENSG00000063169	protein_coding	896.556	-0.24559	0.061069	-4.02152	5.78235e-05	0.000259822
SPHK2	ENSG00000063176	protein_coding	717.02	-0.114887	0.0568749	-2.01999	0.0433845	0.08442
RPL18	ENSG00000063177	protein_coding	29144.5	-0.262034	0.068109	-3.84728	0.000119436	0.000493781
CA11	ENSG00000063180	protein_coding	703.951	-0.215105	0.097529	-2.20555	0.0274154	0.0571812
ISOC2	ENSG00000063241	protein_coding	2100.8	-0.288771	0.0622199	-4.64113	3.46515e-06	2.0515e-05
U2AF2	ENSG00000063244	protein_coding	6963.93	-0.274145	0.0431962	-6.34652	2.20241e-10	2.9333e-09
EPN1	ENSG00000063245	protein_coding	6384.81	-0.147382	0.0528011	-2.79128	0.00525008	0.0137474
MED29	ENSG00000063322	protein_coding	3403.81	-0.0561176	0.0456515	-1.22926	0.218974	0.321578
AHRR	ENSG00000063438	protein_coding	163.455	-0.30344	0.130599	-2.32344	0.0201553	0.0440165
GSC2	ENSG00000063515	protein_coding	0.139077	-0.175673	0.53292	-0.329642	0.74167
ZNF275	ENSG00000063587	protein_coding	1469.8	-0.0422052	0.0525266	-0.803502	0.421685	0.538624
MTMR1	ENSG00000063601	protein_coding	2019.14	-0.0180633	0.0395512	-0.456707	0.647882	0.739949
GPC1	ENSG00000063660	protein_coding	3085.93	0.159887	0.09535	1.67684	0.093573	0.160301
ADCK1	ENSG00000063761	protein_coding	446.983	-0.135243	0.0526062	-2.57087	0.0101445	0.024362
HAGH	ENSG00000063854	protein_coding	1981.92	-0.0100907	0.0554572	-0.181954	0.855619	0.899219
RNF4	ENSG00000063978	protein_coding	3273.51	-0.16142	0.0325815	-4.95434	7.25745e-07	4.98929e-06
CASP8	ENSG00000064012	protein_coding	2098.5	-0.0939347	0.044988	-2.088	0.0367981	0.0734505
LIMCH1	ENSG00000064042	protein_coding	7298.41	0.140331	0.0836931	1.67674	0.0935941	0.160331
INTS13	ENSG00000064102	protein_coding	1267.45	-0.284749	0.062116	-4.58414	4.55849e-06	2.63037e-05
TM7SF3	ENSG00000064115	protein_coding	4383.02	0.0884335	0.0710591	1.24451	0.213313	0.314703
DLX3	ENSG00000064195	protein_coding	196.067	0.244666	0.152239	1.60711	0.10803	0.180487
SPA17	ENSG00000064199	protein_coding	538.262	0.267754	0.0733701	3.64936	0.000262895	0.000989926
TSPAN32	ENSG00000064201	protein_coding	94.9319	0.478452	0.10175	4.70222	2.57348e-06	1.56518e-05
CCN5	ENSG00000064205	protein_coding	508.896	0.521065	0.105852	4.9226	8.54011e-07	5.77764e-06
DMRT3	ENSG00000064218	protein_coding	23.1416	-0.290183	0.227821	-1.27373	0.202759	0.302219
ST3GAL6	ENSG00000064225	protein_coding	480.435	0.320868	0.0832625	3.85369	0.000116352	0.000482733
ATP2C2	ENSG00000064270	protein_coding	1738.65	-0.145466	0.108046	-1.34633	0.178198	0.272504
NGFR	ENSG00000064300	protein_coding	159.464	1.18103	0.124051	9.52052	1.72311e-21	1.2186e-19
CDON	ENSG00000064309	protein_coding	566.229	0.0361883	0.106587	0.33952	0.734218	0.80882
TAF2	ENSG00000064313	protein_coding	1842.31	-0.242713	0.0502953	-4.82575	1.39475e-06	8.98843e-06
HIPK2	ENSG00000064393	protein_coding	5095.78	-0.153073	0.0778815	-1.96547	0.0493602	0.094122
TNPO3	ENSG00000064419	protein_coding	3208.01	-0.246511	0.0418327	-5.89277	3.79775e-09	4.10983e-08
BORCS8-MEF2B	ENSG00000064489	protein_coding	19.0582	-0.0422466	0.075019	-0.563144	0.573337	0.678013
RFXANK	ENSG00000064490	protein_coding	1867.04	-0.213243	0.0584902	-3.64578	0.000266581	0.00100194
TMEM161A	ENSG00000064545	protein_coding	1316.36	-0.232256	0.0583291	-3.98183	6.83875e-05	0.000301509
LPAR2	ENSG00000064547	protein_coding	933.804	-0.0914883	0.0572263	-1.59871	0.109885	0.183058
CTSA	ENSG00000064601	protein_coding	13149.8	-0.261093	0.0598186	-4.36474	1.27272e-05	6.66205e-05
SUGP2	ENSG00000064607	protein_coding	1982.08	-0.0111015	0.0528963	-0.209873	0.833767	0.88319
SLC12A2	ENSG00000064651	protein_coding	3904.54	-0.0162475	0.100004	-0.162469	0.870937	0.910099
SNX24	ENSG00000064652	protein_coding	787.247	0.120275	0.0471351	2.5517	0.0107198	0.025561
EYA2	ENSG00000064655	protein_coding	882.041	-0.479307	0.172092	-2.78518	0.00534978	0.0139865
CNN2	ENSG00000064666	protein_coding	10720.2	0.0760756	0.0583665	1.30341	0.192434	0.289696
ABCA7	ENSG00000064687	protein_coding	1856.76	-0.248727	0.0785702	-3.16567	0.00154727	0.00474526
SNCAIP	ENSG00000064692	protein_coding	251.659	0.356154	0.110195	3.23204	0.00122912	0.0038826
DDX20	ENSG00000064703	protein_coding	800.94	-0.0430442	0.0365466	-1.17779	0.238881	0.34521
BTBD1	ENSG00000064726	protein_coding	2914.84	0.028147	0.0355647	0.791431	0.428693	0.545165
FAR2	ENSG00000064763	protein_coding	433.215	0.438569	0.0962999	4.5542	5.25846e-06	2.99599e-05
BCAS1	ENSG00000064787	protein_coding	1637.96	0.299736	0.179324	1.67148	0.0946276	0.161788
POU1F1	ENSG00000064835	protein_coding	2.85968	0.425925	0.132526	3.21389	0.0013095	0.00410095
CHI3L2	ENSG00000064886	protein_coding	899.465	0.700714	0.138102	5.0739	3.89752e-07	2.82504e-06
SBNO2	ENSG00000064932	protein_coding	5815.94	-0.316387	0.0651542	-4.85598	1.19792e-06	7.82935e-06
PMS1	ENSG00000064933	protein_coding	744.174	-0.190666	0.0422868	-4.50886	6.51757e-06	3.63174e-05
HMG20B	ENSG00000064961	protein_coding	2826.78	-0.191842	0.0518222	-3.70193	0.000213963	0.000824216
CALCRL	ENSG00000064989	protein_coding	1544.1	1.04003	0.0754605	13.7824	3.25061e-43	1.15509e-40
TAF11	ENSG00000064995	protein_coding	1468.19	-0.179848	0.0441943	-4.06949	4.71162e-05	0.000216513
ANKS1A	ENSG00000064999	protein_coding	2681.16	0.136256	0.0487195	2.79674	0.00516203	0.0135471
AP3D1	ENSG00000065000	protein_coding	8374.52	-0.176119	0.0442008	-3.98451	6.76187e-05	0.000298453
ZNF76	ENSG00000065029	protein_coding	1949.82	-0.169165	0.0473755	-3.57072	0.000356002	0.00129856
SLC9A3R2	ENSG00000065054	protein_coding	5507.03	0.0787304	0.0796737	0.98816	0.323074	0.438518
NTHL1	ENSG00000065057	protein_coding	1147.21	-0.27259	0.0741547	-3.67597	0.000236948	0.000902494
UHRF1BP1	ENSG00000065060	protein_coding	1998.48	-0.0539449	0.0525286	-1.02696	0.304438	0.418741
GNAI3	ENSG00000065135	protein_coding	4745.22	-0.0644597	0.0410472	-1.57038	0.116327	0.191859
IPO5	ENSG00000065150	protein_coding	6682.67	-0.134013	0.0510814	-2.62351	0.00870284	0.0213421
OAT	ENSG00000065154	protein_coding	6836.85	-0.460921	0.0808245	-5.70274	1.179e-08	1.16934e-07
WDR3	ENSG00000065183	protein_coding	2044.53	-0.186387	0.0516208	-3.61069	0.000305379	0.00113268
PKN2	ENSG00000065243	protein_coding	2942.77	-0.152237	0.0503457	-3.02383	0.00249595	0.00720738
WDR18	ENSG00000065268	protein_coding	1378.95	-0.284733	0.0633821	-4.49233	7.0448e-06	3.89698e-05
TRAM2	ENSG00000065308	protein_coding	2524.24	0.243348	0.0554382	4.38953	1.13598e-05	6.01232e-05
NTN1	ENSG00000065320	protein_coding	780.233	0.336426	0.124647	2.69903	0.00695426	0.017614
GLP2R	ENSG00000065325	protein_coding	19.4794	0.981751	0.186996	5.25011	1.52006e-07	1.20273e-06
MCM10	ENSG00000065328	protein_coding	462.799	-0.83808	0.108073	-7.75475	8.85142e-15	2.47247e-13
DGKA	ENSG00000065357	protein_coding	1571.25	0.095207	0.0697624	1.36473	0.172337	0.26533
ERBB3	ENSG00000065361	protein_coding	13091.5	-0.187991	0.0772109	-2.43477	0.0149011	0.0339479
ROPN1	ENSG00000065371	protein_coding	1.09297	0.421917	0.260817	1.61767	0.105733	0.177336
ANKRD44	ENSG00000065413	protein_coding	1196.26	0.766474	0.0783378	9.78422	1.31606e-22	1.0546e-20
KARS1	ENSG00000065427	protein_coding	6758.94	-0.19482	0.0429887	-4.53188	5.84609e-06	3.29313e-05
ADAT1	ENSG00000065457	protein_coding	1259.66	0.0190447	0.0441205	0.431652	0.665995	0.754987
PDIA5	ENSG00000065485	protein_coding	2037.01	-0.302716	0.0565261	-5.35533	8.53981e-08	7.13191e-07
TBC1D22B	ENSG00000065491	protein_coding	1185.06	-0.104489	0.0353703	-2.95415	0.00313527	0.00876395
NDUFB4	ENSG00000065518	protein_coding	3897.07	-0.421526	0.0550223	-7.661	1.84484e-14	4.86777e-13
SPEN	ENSG00000065526	protein_coding	4085.82	0.117444	0.049132	2.39037	0.0168314	0.0376879
MYLK	ENSG00000065534	protein_coding	4984.99	0.902587	0.0748835	12.0532	1.86557e-33	3.65955e-31
ZC3H15	ENSG00000065548	protein_coding	3325.12	-0.286754	0.0401843	-7.13598	9.61032e-13	1.91905e-11
MAP2K4	ENSG00000065559	protein_coding	1561.68	0.0370567	0.0386452	0.958894	0.337612	0.454036
PACC1	ENSG00000065600	protein_coding	619.62	-0.327037	0.0599811	-5.45234	4.97101e-08	4.36418e-07
SNAP91	ENSG00000065609	protein_coding	18.4063	-0.045631	0.206457	-0.22102	0.825077	0.876771
SLK	ENSG00000065613	protein_coding	5007.61	0.0570276	0.056546	1.00852	0.313206	0.428102
CYB5R4	ENSG00000065615	protein_coding	1163.08	0.094264	0.054844	1.71877	0.0856568	0.149042
COL17A1	ENSG00000065618	protein_coding	3432.76	0.858596	0.192878	4.45149	8.5277e-06	4.63449e-05
GSTO2	ENSG00000065621	protein_coding	705.776	-0.111395	0.109278	-1.01937	0.308027	0.422529
SEC61A2	ENSG00000065665	protein_coding	368.059	-0.354061	0.0619809	-5.71242	1.11382e-08	1.10901e-07
PRKCQ	ENSG00000065675	protein_coding	236.366	0.476319	0.0949788	5.01501	5.30317e-07	3.7474e-06
TLE2	ENSG00000065717	protein_coding	2197.22	0.0982294	0.0791558	1.24096	0.21462	0.316362
ASB1	ENSG00000065802	protein_coding	1195.15	-0.0170205	0.0401853	-0.423551	0.671893	0.759698
FAM107B	ENSG00000065809	protein_coding	8047.11	-0.0883399	0.0697859	-1.26587	0.20556	0.305573
ME1	ENSG00000065833	protein_coding	1916.55	-0.351868	0.102606	-3.4293	0.000605138	0.00207416
TBC1D1	ENSG00000065882	protein_coding	2012.37	0.196234	0.0665324	2.94945	0.00318337	0.00887953
CDK13	ENSG00000065883	protein_coding	2894.04	-0.0612949	0.0373047	-1.64309	0.100365	0.169888
MTHFD2	ENSG00000065911	protein_coding	4219.14	-0.636393	0.078032	-8.15553	3.47643e-16	1.21345e-14
SLC9A7	ENSG00000065923	protein_coding	1553.36	-0.151608	0.0749835	-2.02189	0.0431881	0.084095
FOXJ2	ENSG00000065970	protein_coding	1597.32	0.0966659	0.0440994	2.192	0.0283796	0.0588778
YBX1	ENSG00000065978	protein_coding	16886.7	-0.143657	0.0513225	-2.7991	0.00512458	0.0134599
PDE4A	ENSG00000065989	protein_coding	1853.7	0.0744063	0.0625333	1.18987	0.234099	0.339624
PPP2R5A	ENSG00000066027	protein_coding	4505.08	0.144975	0.0568951	2.5481	0.0108311	0.0257908
CTNNA2	ENSG00000066032	protein_coding	12.1621	0.446622	0.222164	2.01032	0.044397	0.0860855
ELAVL1	ENSG00000066044	protein_coding	3561.82	-0.156353	0.02777	-5.6303	1.79892e-08	1.72309e-07
TIE1	ENSG00000066056	protein_coding	1236.76	0.843714	0.0700891	12.0377	2.25052e-33	4.35555e-31
DIP2B	ENSG00000066084	protein_coding	2771.68	-0.143645	0.0539743	-2.66136	0.00778253	0.019403
SMARCD1	ENSG00000066117	protein_coding	2958.07	-0.295365	0.0433363	-6.81566	9.38342e-12	1.57732e-10
KDM4A	ENSG00000066135	protein_coding	2489.34	0.0464381	0.037797	1.22862	0.219215	0.321815
NFYC	ENSG00000066136	protein_coding	2487.58	-0.0626502	0.0400035	-1.56612	0.117321	0.193271
ZMYND12	ENSG00000066185	protein_coding	173.32	0.283499	0.0920248	3.08068	0.00206528	0.00611152
SLC9A3	ENSG00000066230	protein_coding	69.435	-0.603939	0.147073	-4.10639	4.01883e-05	0.000187989
NGEF	ENSG00000066248	protein_coding	538.078	-0.213963	0.136697	-1.56524	0.117526	0.193557
ASPM	ENSG00000066279	protein_coding	1128.08	-0.817677	0.106815	-7.65505	1.93237e-14	5.08018e-13
CD84	ENSG00000066294	protein_coding	1419.92	0.613042	0.093936	6.52617	6.74748e-11	9.8391e-10
ELOVL1	ENSG00000066322	protein_coding	4938.27	-0.0842935	0.0483574	-1.74314	0.0813099	0.142849
SPI1	ENSG00000066336	protein_coding	1950.23	0.460601	0.0871891	5.28278	1.27237e-07	1.02546e-06
ZNRD1	ENSG00000066379	protein_coding	898.077	-0.290895	0.0548871	-5.29988	1.15879e-07	9.42515e-07
MPPED2	ENSG00000066382	protein_coding	40.0562	0.750321	0.118196	6.34809	2.18008e-10	2.90534e-09
CLDN18	ENSG00000066405	protein_coding	4411.52	2.79418	0.214781	13.0094	1.08197e-38	2.95003e-36
ZBTB11	ENSG00000066422	protein_coding	1459.5	-0.026462	0.0381802	-0.693081	0.488259	0.602019
ATXN3	ENSG00000066427	protein_coding	1153.05	0.115397	0.0477719	2.41558	0.0157101	0.0355053
GOLGA5	ENSG00000066455	protein_coding	3477.65	-0.305511	0.0388943	-7.8549	4.00083e-15	1.19616e-13
FGFR2	ENSG00000066468	protein_coding	1238.62	0.878698	0.10919	8.04745	8.45339e-16	2.79323e-14
LRRC40	ENSG00000066557	protein_coding	879.658	-0.146889	0.0500699	-2.93368	0.00334973	0.00928737
ISOC1	ENSG00000066583	protein_coding	1187.27	-0.0417394	0.0488597	-0.85427	0.392955	0.5105
EML1	ENSG00000066629	protein_coding	590.5	0.663913	0.0789224	8.41223	4.02301e-17	1.61786e-15
TRMT11	ENSG00000066651	protein_coding	542.825	-0.0745429	0.0465956	-1.59978	0.109646	0.182731
THUMPD1	ENSG00000066654	protein_coding	2821.83	0.122769	0.0369223	3.32506	0.000884011	0.00290375
MSANTD3	ENSG00000066697	protein_coding	1029.87	-0.191748	0.0530625	-3.61363	0.000301936	0.00112135
KIF26A	ENSG00000066735	protein_coding	219.836	0.511714	0.124877	4.09773	4.17214e-05	0.000194213
ATG2B	ENSG00000066739	protein_coding	1762.03	0.0605699	0.0536641	1.12869	0.25903	0.368397
ARFGEF1	ENSG00000066777	protein_coding	4718.52	-0.0911751	0.0584281	-1.56047	0.11865	0.195073
ACSM2B	ENSG00000066813	protein_coding	1.51569	0.118113	0.238686	0.494849	0.620707	0.718183
ZFAT	ENSG00000066827	protein_coding	734.272	-0.443067	0.0659779	-6.71539	1.8757e-11	2.99644e-10
MTFR1	ENSG00000066855	protein_coding	1938.75	-0.465561	0.0680739	-6.83906	7.97172e-12	1.34628e-10
STAG3	ENSG00000066923	protein_coding	353.53	-0.0930359	0.120261	-0.773614	0.439159	0.55538
FECH	ENSG00000066926	protein_coding	1471.37	-0.243684	0.0648977	-3.7549	0.000173412	0.00068499
MYO9A	ENSG00000066933	protein_coding	1939.92	0.338563	0.063189	5.35795	8.41727e-08	7.04315e-07
DDX3Y	ENSG00000067048	protein_coding	995.334	-0.0262004	0.301103	-0.0870147	0.93066	0.952702
PFKP	ENSG00000067057	protein_coding	8253.66	-0.581842	0.0947805	-6.13883	8.31304e-10	1.01346e-08
IDI1	ENSG00000067064	protein_coding	3118.52	-0.224881	0.0671346	-3.3497	0.000809003	0.00268134
SP100	ENSG00000067066	protein_coding	3885.01	0.135197	0.0460273	2.93733	0.00331056	0.00919111
KLF6	ENSG00000067082	protein_coding	8395.29	0.447193	0.0659053	6.78539	1.15771e-11	1.91416e-10
PLPP1	ENSG00000067113	protein_coding	1407.51	-0.115107	0.0755526	-1.52353	0.127626	0.207129
NEO1	ENSG00000067141	protein_coding	2838.73	0.116983	0.0823835	1.41999	0.155612	0.243873
TRAM1	ENSG00000067167	protein_coding	24176.2	0.14682	0.0704706	2.08343	0.0372124	0.0741749
PHKA1	ENSG00000067177	protein_coding	1241.19	-0.390048	0.0620055	-6.29053	3.16379e-10	4.12253e-09
TNFRSF1A	ENSG00000067182	protein_coding	8312.78	-0.167864	0.0574346	-2.92269	0.00347017	0.00958576
CACNB1	ENSG00000067191	protein_coding	933.422	0.102819	0.0989746	1.03884	0.29888	0.412723
EVI5	ENSG00000067208	protein_coding	1270.01	0.213089	0.0566597	3.76085	0.000169338	0.000671343
STOML1	ENSG00000067221	protein_coding	828.809	-0.103691	0.0622888	-1.66467	0.0959782	0.163703
PKM	ENSG00000067225	protein_coding	64802.1	-0.287571	0.0601849	-4.77812	1.76938e-06	1.11395e-05
DHX29	ENSG00000067248	protein_coding	2055.47	0.0900573	0.0482923	1.86484	0.0622039	0.114135
DNTTIP2	ENSG00000067334	protein_coding	3234.72	-0.255778	0.0444968	-5.74822	9.01873e-09	9.12865e-08
METTL22	ENSG00000067365	protein_coding	593.791	-0.111095	0.0424316	-2.61822	0.008839	0.0216271
TP53BP1	ENSG00000067369	protein_coding	2187.86	0.0241081	0.0517406	0.465941	0.641257	0.734609
TRO	ENSG00000067445	protein_coding	302.769	0.318214	0.103133	3.08546	0.00203238	0.00602775
RRP15	ENSG00000067533	protein_coding	1321.44	-0.163426	0.0456137	-3.58282	0.000339902	0.00124612
RHOA	ENSG00000067560	protein_coding	25688.9	0.0657212	0.038562	1.7043	0.0883253	0.152857
DHX8	ENSG00000067596	protein_coding	3159	-0.0223704	0.0348346	-0.64219	0.52075	0.632244
PMS2P4	ENSG00000067601	transcribed_unprocessed_pseudogene	70.7104	-0.0592152	0.0516742	-1.14593	0.251822	0.359953
PRKCZ	ENSG00000067606	protein_coding	2095.14	0.0630912	0.0854577	0.738274	0.460348	0.575727
ZFY	ENSG00000067646	protein_coding	294.466	-0.0551694	0.337088	-0.163665	0.869995	0.909586
IARS2	ENSG00000067704	protein_coding	7481.88	-0.24569	0.0458772	-5.35538	8.53777e-08	7.13159e-07
SYT1	ENSG00000067715	protein_coding	495.794	-0.338058	0.16159	-2.09207	0.036432	0.0728103
NAV3	ENSG00000067798	protein_coding	222.28	0.708776	0.114753	6.17652	6.55281e-10	8.13044e-09
IDH3G	ENSG00000067829	protein_coding	2862.51	-0.243742	0.0496343	-4.91075	9.07307e-07	6.10012e-06
ROGDI	ENSG00000067836	protein_coding	1473.46	0.0331999	0.0604154	0.549526	0.582644	0.686045
PDZD4	ENSG00000067840	protein_coding	179.93	0.41866	0.127686	3.27883	0.0010424	0.0033621
ATP2B3	ENSG00000067842	protein_coding	4.49711	0.68463	0.191355	3.57781	0.000346491	0.00126824
ROCK1	ENSG00000067900	protein_coding	3166.32	0.246365	0.0509552	4.83494	1.33189e-06	8.62051e-06
CBFB	ENSG00000067955	protein_coding	2986.5	0.00658832	0.0378263	0.174173	0.861729	0.903384
PDK3	ENSG00000067992	protein_coding	486.33	-0.323094	0.0745346	-4.33483	1.45875e-05	7.53215e-05
HYAL2	ENSG00000068001	protein_coding	3376.31	0.0555085	0.0534088	1.03931	0.298659	0.412524
HDAC4	ENSG00000068024	protein_coding	921.868	-0.0669723	0.0575197	-1.16434	0.244288	0.351396
RASSF1	ENSG00000068028	protein_coding	1265.83	0.0110168	0.0433295	0.254258	0.799297	0.858593
FGFR3	ENSG00000068078	protein_coding	1873.33	0.481004	0.145445	3.30712	0.000942614	0.00307759
IFI35	ENSG00000068079	protein_coding	2291.39	-0.206659	0.0788224	-2.62183	0.00874585	0.0214294
HEATR6	ENSG00000068097	protein_coding	1057.06	-0.042203	0.042645	-0.989635	0.322352	0.437746
COASY	ENSG00000068120	protein_coding	4198.85	-0.371087	0.0457439	-8.11227	4.96837e-16	1.69999e-14
PLEKHH3	ENSG00000068137	protein_coding	1452.22	-0.120575	0.06096	-1.97794	0.0479359	0.0918262
MEF2A	ENSG00000068305	protein_coding	2310.38	0.283378	0.0398764	7.10642	1.19093e-12	2.33194e-11
OTUD5	ENSG00000068308	protein_coding	3619.95	-0.0572209	0.0417237	-1.37142	0.170243	0.262572
TFE3	ENSG00000068323	protein_coding	3484.42	-0.0544798	0.0448196	-1.21554	0.224162	0.327774
TBC1D25	ENSG00000068354	protein_coding	1033.72	-0.0720676	0.0431709	-1.66935	0.0950471	0.162364
ACSL4	ENSG00000068366	protein_coding	4879.15	0.102587	0.0781975	1.3119	0.189555	0.286357
INPP5A	ENSG00000068383	protein_coding	1090.39	0.157813	0.0441538	3.57417	0.000351335	0.00128392
GPKOW	ENSG00000068394	protein_coding	1200.1	-0.137657	0.0491365	-2.80153	0.00508612	0.0133682
GRIPAP1	ENSG00000068400	protein_coding	2992.82	-0.161705	0.0510157	-3.16971	0.0015259	0.00468888
FTSJ1	ENSG00000068438	protein_coding	2143.39	-0.274496	0.0459144	-5.97843	2.25305e-09	2.5337e-08
PRR11	ENSG00000068489	protein_coding	864.828	-0.527191	0.0990728	-5.32124	1.0306e-07	8.46026e-07
REEP1	ENSG00000068615	protein_coding	175.332	0.333457	0.14022	2.3781	0.0174022	0.0388177
ATP11A	ENSG00000068650	protein_coding	16171.2	0.0106378	0.0946958	0.112337	0.910556	0.938304
POLR1A	ENSG00000068654	protein_coding	2998.06	-0.125698	0.0478206	-2.62853	0.00857553	0.0210779
LAPTM4A	ENSG00000068697	protein_coding	16137.1	0.0669047	0.0453099	1.4766	0.139783	0.223339
TTC7A	ENSG00000068724	protein_coding	3191.52	0.0510128	0.0493911	1.03283	0.301682	0.415805
IP6K2	ENSG00000068745	protein_coding	2803.54	-0.125755	0.0397236	-3.16575	0.00154685	0.00474452
STON1-GTF2A1L	ENSG00000068781	protein_coding	4.03519	0.233298	0.134491	1.73468	0.0827973	0.144969
SRBD1	ENSG00000068784	protein_coding	904.931	0.049884	0.0383897	1.29941	0.193803	0.291321
KIF2A	ENSG00000068796	protein_coding	1481.15	0.0650556	0.0612089	1.06285	0.287852	0.400487
RASGRP2	ENSG00000068831	protein_coding	353.603	0.977734	0.0904343	10.8115	3.0354e-27	3.74903e-25
PSME4	ENSG00000068878	protein_coding	4693.92	-0.184406	0.0444751	-4.14629	3.37912e-05	0.000160838
IFT80	ENSG00000068885	protein_coding	973.539	0.0419815	0.0647239	0.648624	0.516581	0.628398
SIRT2	ENSG00000068903	protein_coding	2367.73	0.0334303	0.051428	0.650041	0.515666	0.627548
ERLEC1	ENSG00000068912	protein_coding	5850.08	-0.137936	0.0508271	-2.71383	0.00665102	0.0169351
PPP2R5B	ENSG00000068971	protein_coding	991.542	-0.0537183	0.0527242	-1.01886	0.308271	0.42275
PYGM	ENSG00000068976	protein_coding	60.4955	0.682782	0.0963027	7.08995	1.34156e-12	2.61508e-11
PAGE1	ENSG00000068985	protein_coding	10.8105	-2.59468	0.459109	-5.65154	1.59013e-08	1.53771e-07
PITX1	ENSG00000069011	protein_coding	787.709	-0.654178	0.164051	-3.98764	6.67329e-05	0.000294959
TRPC7	ENSG00000069018	protein_coding	0.960662	-0.147404	0.32739	-0.450239	0.652538	0.743542
MAST4	ENSG00000069020	protein_coding	2550.01	0.259751	0.0767999	3.38218	0.000719138	0.00241376
ADGRF5	ENSG00000069122	protein_coding	11856.5	0.870425	0.115135	7.56003	4.02975e-14	1.01451e-12
SDK2	ENSG00000069188	protein_coding	398.471	0.51109	0.137087	3.72821	0.000192841	0.000751736
ADAM7	ENSG00000069206	protein_coding	1.06074	-0.382796	0.380801	-1.00524	0.314781	0.429793
NUP133	ENSG00000069248	protein_coding	2735.74	-0.0914444	0.0386122	-2.36828	0.017871	0.0397203
NUCKS1	ENSG00000069275	protein_coding	16786.1	-0.0187506	0.046669	-0.401779	0.687847	0.77252
VPS35	ENSG00000069329	protein_coding	7056.28	-0.0629796	0.038667	-1.62877	0.103362	0.174044
DNAJA2	ENSG00000069345	protein_coding	3695.19	-0.0770003	0.0395538	-1.94673	0.0515676	0.0975376
BCL3	ENSG00000069399	protein_coding	3969.78	-0.510531	0.0759911	-6.7183	1.83856e-11	2.94115e-10
KCNAB2	ENSG00000069424	protein_coding	1722.07	0.410645	0.070032	5.86367	4.52734e-09	4.82827e-08
ABCC9	ENSG00000069431	protein_coding	811.096	0.747051	0.10396	7.18595	6.67407e-13	1.37386e-11
GAL	ENSG00000069482	protein_coding	124.154	-1.56197	0.210611	-7.41634	1.20401e-13	2.80776e-12
CLEC2D	ENSG00000069493	protein_coding	743.283	0.194209	0.084313	2.30342	0.0212551	0.0461094
FUNDC1	ENSG00000069509	protein_coding	788.384	-0.224796	0.0526768	-4.26747	1.97704e-05	9.89594e-05
MAOB	ENSG00000069535	protein_coding	934.005	0.56752	0.107195	5.29428	1.19483e-07	9.69645e-07
RORA	ENSG00000069667	protein_coding	1052.62	0.661042	0.088747	7.44861	9.4328e-14	2.25058e-12
DRD4	ENSG00000069696	protein_coding	38.4384	-0.647819	0.115687	-5.59975	2.14662e-08	2.02174e-07
TGFBR3	ENSG00000069702	protein_coding	760.943	1.33771	0.0858973	15.5734	1.10365e-54	6.83507e-52
PLA2G10	ENSG00000069764	protein_coding	282.772	0.164951	0.168884	0.976713	0.328711	0.444488
HES2	ENSG00000069812	protein_coding	203.796	-0.0613193	0.145529	-0.421355	0.673496	0.760923
ATP1B3	ENSG00000069849	protein_coding	3959.64	-0.127847	0.0614603	-2.08016	0.037511	0.0746947
NEDD4	ENSG00000069869	protein_coding	804.888	0.158063	0.073432	2.15251	0.0313574	0.0641381
PIGB	ENSG00000069943	protein_coding	564.959	0.0947908	0.0487654	1.94381	0.051918	0.098089
MAPK6	ENSG00000069956	protein_coding	2760.76	-0.302924	0.0623452	-4.85881	1.18091e-06	7.73e-06
GNB5	ENSG00000069966	protein_coding	1182.89	0.0186672	0.0448737	0.415994	0.677414	0.763878
RAB27A	ENSG00000069974	protein_coding	3619.98	0.32181	0.0668585	4.81329	1.48462e-06	9.49703e-06
HDHD5	ENSG00000069998	protein_coding	1621.35	-0.175735	0.051507	-3.41186	0.000645212	0.00219599
UFD1	ENSG00000070010	protein_coding	2731.59	-0.356961	0.0463013	-7.70953	1.26283e-14	3.4195e-13
LRP6	ENSG00000070018	protein_coding	2248.63	0.14086	0.0644594	2.18524	0.028871	0.0597458
GUCY2C	ENSG00000070019	protein_coding	119.257	-0.402102	0.116288	-3.45782	0.000544574	0.00188912
SCT	ENSG00000070031	protein_coding	21.3573	-0.161459	0.116877	-1.38145	0.167142	0.258816
PHRF1	ENSG00000070047	protein_coding	2644.34	-0.0882687	0.0476572	-1.85216	0.0640027	0.116931
ELP1	ENSG00000070061	protein_coding	1955.49	-0.0387909	0.0380277	-1.02007	0.307696	0.422234
NUCB2	ENSG00000070081	protein_coding	4297.43	-0.174442	0.0617909	-2.8231	0.00475615	0.012623
PFN2	ENSG00000070087	protein_coding	4779.11	-0.764449	0.108798	-7.02631	2.12071e-12	3.9628e-11
PTPN3	ENSG00000070159	protein_coding	2091.99	-0.0579033	0.0634956	-0.911925	0.361808	0.478905
SPTB	ENSG00000070182	protein_coding	1591.03	-0.0905223	0.171337	-0.52833	0.59727	0.698561
DAPP1	ENSG00000070190	protein_coding	921.167	0.290583	0.0851323	3.41332	0.000641774	0.00218608
FGF10	ENSG00000070193	protein_coding	17.2517	2.16045	0.144589	14.9419	1.75782e-50	8.65968e-48
SLC44A1	ENSG00000070214	protein_coding	6569.19	-0.184666	0.0565368	-3.2663	0.00108962	0.00349672
TMEM260	ENSG00000070269	protein_coding	1001.28	-0.198532	0.0548748	-3.6179	0.000296998	0.001105
SMG6	ENSG00000070366	protein_coding	1038.85	0.335949	0.0493244	6.81102	9.69121e-12	1.62159e-10
EXOC5	ENSG00000070367	protein_coding	3057.21	-0.086706	0.0489331	-1.77193	0.076406	0.135719
CLTCL1	ENSG00000070371	protein_coding	297.151	-0.242699	0.080535	-3.01358	0.00258185	0.00742476
FGF22	ENSG00000070388	protein_coding	3.83544	0.0708073	0.126485	0.559807	0.575611	0.679928
FSTL3	ENSG00000070404	protein_coding	2134.66	0.104701	0.101493	1.03161	0.302256	0.416378
DGCR2	ENSG00000070413	protein_coding	7812.88	-0.0268489	0.0524316	-0.512075	0.608598	0.708009
RNF126	ENSG00000070423	protein_coding	1305.96	-0.240347	0.0547355	-4.39107	1.12796e-05	5.97716e-05
MNT	ENSG00000070444	protein_coding	1298.63	-0.0405859	0.0432112	-0.939246	0.347605	0.46408
ZXDC	ENSG00000070476	protein_coding	1540.99	0.00673779	0.0422846	0.159344	0.873398	0.911825
JMJD6	ENSG00000070495	protein_coding	1382.79	-0.27788	0.0434242	-6.39919	1.56206e-10	2.14367e-09
POLB	ENSG00000070501	protein_coding	1470.8	-0.0578187	0.0744772	-0.776328	0.437555	0.553933
ST6GALNAC1	ENSG00000070526	protein_coding	3416.03	-0.0955698	0.132651	-0.720459	0.471242	0.585751
WIPI1	ENSG00000070540	protein_coding	1355.14	-0.152475	0.049531	-3.07837	0.00208133	0.00615063
FRMPD1	ENSG00000070601	protein_coding	11.4603	-0.329546	0.160115	-2.05818	0.0395728	0.078122
GBA2	ENSG00000070610	protein_coding	2551.41	-0.218354	0.0486719	-4.48624	7.24927e-06	3.99835e-05
NDST1	ENSG00000070614	protein_coding	4773.85	0.344207	0.0530209	6.49192	8.47483e-11	1.21777e-09
ASNS	ENSG00000070669	protein_coding	2010.67	-0.589933	0.0845877	-6.97421	3.07584e-12	5.60032e-11
AP3M2	ENSG00000070718	protein_coding	1094.79	0.0544801	0.0553637	0.984041	0.325096	0.440602
CNGB1	ENSG00000070729	protein_coding	131.174	-0.0607914	0.16086	-0.377916	0.705493	0.786437
ST6GALNAC2	ENSG00000070731	protein_coding	767.687	0.252002	0.109738	2.2964	0.0216527	0.0468058
CHAT	ENSG00000070748	protein_coding	8.30627	-0.145962	0.378098	-0.386043	0.699465	0.781667
PABPC1	ENSG00000070756	protein_coding	75744	-0.400082	0.0617526	-6.47878	9.24643e-11	1.31902e-09
TESK2	ENSG00000070759	protein_coding	269.567	0.226276	0.054244	4.17146	3.02656e-05	0.000145543
CFAP20	ENSG00000070761	protein_coding	1342.77	-0.12672	0.0420345	-3.01466	0.0025727	0.00740475
CSNK2A2	ENSG00000070770	protein_coding	3102.51	-0.149338	0.037408	-3.99215	6.54758e-05	0.000290088
PTPN21	ENSG00000070778	protein_coding	899.404	0.69659	0.064215	10.8478	2.04325e-27	2.54537e-25
EIF2B3	ENSG00000070785	protein_coding	1058.02	-0.190959	0.041406	-4.61186	3.99081e-06	2.3279e-05
CAMK2A	ENSG00000070808	protein_coding	26.922	0.808452	0.0960771	8.41461	3.94211e-17	1.58975e-15
TCOF1	ENSG00000070814	protein_coding	2973.31	-0.284254	0.0528341	-5.38013	7.44328e-08	6.29744e-07
CDC42	ENSG00000070831	protein_coding	13380.5	0.073973	0.0466084	1.58712	0.112486	0.186532
OSBPL3	ENSG00000070882	protein_coding	2178.81	-0.00909346	0.0705179	-0.128952	0.897395	0.928649
EPHA8	ENSG00000070886	protein_coding	6.4963	-0.096324	0.211785	-0.45482	0.649239	0.74099
SLC12A3	ENSG00000070915	protein_coding	20.0644	0.42486	0.113818	3.7328	0.00018936	0.000739828
RAD18	ENSG00000070950	protein_coding	747.823	-0.185404	0.0449798	-4.12193	3.75715e-05	0.000176947
ATP2B1	ENSG00000070961	protein_coding	2538.35	-0.214307	0.0761349	-2.81484	0.00488017	0.0129066
TRPM5	ENSG00000070985	protein_coding	29.2798	-1.28969	0.190257	-6.77865	1.21306e-11	1.99728e-10
NCK2	ENSG00000071051	protein_coding	2293.21	0.00655251	0.0477725	0.137161	0.890904	0.924274
MAP4K4	ENSG00000071054	protein_coding	6622.67	-0.0344607	0.0687413	-0.50131	0.616153	0.714555
MGAT4A	ENSG00000071073	protein_coding	2865.5	-0.136661	0.0681443	-2.00546	0.0449137	0.0869566
RPL31	ENSG00000071082	protein_coding	31786.8	-0.275734	0.0671283	-4.10757	3.99847e-05	0.000187174
WDR1	ENSG00000071127	protein_coding	15458.4	-0.038477	0.0409141	-0.940434	0.346995	0.463504
SNX13	ENSG00000071189	protein_coding	2753.03	0.204625	0.0642044	3.18708	0.00143716	0.0044471
MS4A12	ENSG00000071203	protein_coding	0.407978	0.0814077	0.452353	0.179965	0.85718	0.900314
ARHGAP10	ENSG00000071205	protein_coding	818.672	0.235424	0.0719801	3.27069	0.00107286	0.00344829
RPS6KA2	ENSG00000071242	protein_coding	5890.6	0.385137	0.0752345	5.11914	3.06925e-07	2.27761e-06
ING3	ENSG00000071243	protein_coding	583.019	0.02474	0.0427407	0.578838	0.562699	0.669083
VASH1	ENSG00000071246	protein_coding	1199.94	0.478313	0.062604	7.6403	2.1671e-14	5.66976e-13
LMCD1	ENSG00000071282	protein_coding	1601.04	0.622853	0.0601633	10.3527	4.06806e-25	4.11092e-23
BUD23	ENSG00000071462	protein_coding	4763.26	-0.41726	0.0462666	-9.0186	1.90509e-19	1.03995e-17
SEL1L	ENSG00000071537	protein_coding	7434.07	-0.0279249	0.0540043	-0.517087	0.605095	0.705213
TRIP13	ENSG00000071539	protein_coding	1096.13	-0.687436	0.105725	-6.50211	7.92028e-11	1.14339e-09
ATP6AP1	ENSG00000071553	protein_coding	10050.6	-0.119435	0.0448786	-2.66128	0.00778439	0.0194059
TCF3	ENSG00000071564	protein_coding	3872.07	-0.229332	0.0551977	-4.15474	3.25655e-05	0.000155534
TRIB2	ENSG00000071575	protein_coding	2395.06	0.116536	0.0804584	1.44841	0.147503	0.233429
DAZAP1	ENSG00000071626	protein_coding	4758.56	-0.21689	0.0352619	-6.15085	7.70711e-10	9.43838e-09
MBD3	ENSG00000071655	protein_coding	2686.93	-0.218439	0.0576138	-3.79143	0.000149781	0.000602346
PRLH	ENSG00000071677	protein_coding	0.753564	0.140357	0.264511	0.53063	0.595675	0.697147
HLTF	ENSG00000071794	protein_coding	2422.47	-0.442048	0.0638732	-6.92072	4.49366e-12	7.93843e-11
FAM50A	ENSG00000071859	protein_coding	4247.97	-0.415198	0.0603812	-6.87628	6.14369e-12	1.05943e-10
FAM3A	ENSG00000071889	protein_coding	2654.79	-0.288962	0.059231	-4.87856	1.06863e-06	7.06207e-06
CPSF1	ENSG00000071894	protein_coding	5281.04	-0.314915	0.0619426	-5.08399	3.69597e-07	2.69517e-06
MYO3B	ENSG00000071909	protein_coding	155.678	0.102137	0.174187	0.586363	0.557631	0.664626
CYBRD1	ENSG00000071967	protein_coding	6538.63	1.00667	0.0859162	11.7168	1.04488e-31	1.90326e-29
CDH19	ENSG00000071991	protein_coding	29.7452	0.622845	0.183431	3.39553	0.000684955	0.00231334
PDCD2	ENSG00000071994	protein_coding	1871.58	-0.0726905	0.0421362	-1.72513	0.0845035	0.14742
SLC6A15	ENSG00000072041	protein_coding	48.916	-0.516058	0.292695	-1.76312	0.0778799	0.137888
RDH11	ENSG00000072042	protein_coding	3526.36	-0.230216	0.050713	-4.53959	5.63648e-06	3.18915e-05
PRKACA	ENSG00000072062	protein_coding	3256.85	0.0292098	0.0424506	0.688089	0.491397	0.604942
ADGRL1	ENSG00000072071	protein_coding	1794.67	-0.0117493	0.0754969	-0.155626	0.876327	0.913586
SPP2	ENSG00000072080	protein_coding	41.8593	-1.02611	0.222456	-4.61262	3.97615e-06	2.32029e-05
ACTN1	ENSG00000072110	protein_coding	10087.1	0.139659	0.0683012	2.04475	0.04088	0.0803003
ZFYVE26	ENSG00000072121	protein_coding	1994.13	0.132867	0.0466036	2.85101	0.00435804	0.0117079
RPS6KA6	ENSG00000072133	protein_coding	282.148	-0.00586571	0.128561	-0.0456258	0.963609	0.975603
EPN2	ENSG00000072134	protein_coding	1757.29	-0.00244437	0.0514351	-0.0475233	0.962096	0.974505
PTPN18	ENSG00000072135	protein_coding	3722.84	0.0607128	0.0443796	1.36804	0.171301	0.263989
LIMS2	ENSG00000072163	protein_coding	781.783	0.957495	0.0756184	12.6622	9.5778e-37	2.25661e-34
ASIC4	ENSG00000072182	protein_coding	11.6306	-0.154111	0.13513	-1.14047	0.254092	0.362611
SPEG	ENSG00000072195	protein_coding	434.747	0.0540286	0.123618	0.43706	0.662068	0.751675
LNX1	ENSG00000072201	protein_coding	533.155	-0.192578	0.0717189	-2.68518	0.00724898	0.0182496
ALDH3A2	ENSG00000072210	protein_coding	9176.55	-0.136909	0.0938986	-1.45805	0.144826	0.230057
TFRC	ENSG00000072274	protein_coding	7739.34	-0.333448	0.0908099	-3.67194	0.000240716	0.000914835
SREBF1	ENSG00000072310	protein_coding	6313.11	-0.357047	0.0699144	-5.10692	3.2745e-07	2.41294e-06
TRPC5	ENSG00000072315	protein_coding	3.00215	1.15794	0.284396	4.0716	4.66922e-05	0.000214822
AFF4	ENSG00000072364	protein_coding	5708.6	0.138654	0.0540347	2.56602	0.0102874	0.0246573
UBE2D1	ENSG00000072401	protein_coding	1446.95	-0.206317	0.0479622	-4.30165	1.69532e-05	8.60907e-05
MPP5	ENSG00000072415	protein_coding	1941.95	0.12695	0.048342	2.62608	0.00863743	0.0212069
RHOBTB1	ENSG00000072422	protein_coding	1096.56	0.00037115	0.0676915	0.00548296	0.995625	0.997005
SMC1A	ENSG00000072501	protein_coding	5382.96	-0.158908	0.0530985	-2.99269	0.00276527	0.00787194
HSD17B10	ENSG00000072506	protein_coding	2878.85	-0.371033	0.0540974	-6.8586	6.95362e-12	1.1887e-10
MARK2	ENSG00000072518	protein_coding	4052.21	-0.272351	0.0421758	-6.4575	1.06446e-10	1.49973e-09
HMMR	ENSG00000072571	protein_coding	752.245	-0.697582	0.0988325	-7.05822	1.68643e-12	3.20518e-11
CHFR	ENSG00000072609	protein_coding	1583.62	-0.239452	0.0427329	-5.60346	2.1011e-08	1.98144e-07
TRHDE	ENSG00000072657	protein_coding	60.8767	1.27309	0.186362	6.83128	8.416e-12	1.4191e-10
P4HA2	ENSG00000072682	protein_coding	3982.5	-0.0635735	0.065268	-0.974038	0.330038	0.445851
FCGR2B	ENSG00000072694	protein_coding	789.741	0.180154	0.0960899	1.87485	0.0608137	0.112068
NFATC3	ENSG00000072736	protein_coding	1306.86	0.434457	0.0561807	7.73321	1.04866e-14	2.88827e-13
TRNT1	ENSG00000072756	protein_coding	791.17	-0.0919265	0.0449764	-2.04388	0.040965	0.080431
ACADVL	ENSG00000072778	protein_coding	11242.3	-0.166996	0.0587844	-2.84083	0.0044997	0.0120318
STK10	ENSG00000072786	protein_coding	2014.19	0.415749	0.0586591	7.08754	1.36518e-12	2.65634e-11
FBXW11	ENSG00000072803	protein_coding	2845.4	0.219968	0.0450838	4.87909	1.06575e-06	7.0452e-06
ACAP1	ENSG00000072818	protein_coding	931.708	0.30242	0.0847093	3.57009	0.000356859	0.00130125
CRMP1	ENSG00000072832	protein_coding	686.843	0.474412	0.0890313	5.3286	9.89734e-08	8.15956e-07
EVC	ENSG00000072840	protein_coding	1017.69	0.397768	0.0648269	6.13585	8.4706e-10	1.03093e-08
DERL2	ENSG00000072849	protein_coding	2001.73	-0.183759	0.0423505	-4.339	1.43133e-05	7.40468e-05
SIDT1	ENSG00000072858	protein_coding	678.564	-0.00219488	0.0973353	-0.0225497	0.982009	0.987707
NDE1	ENSG00000072864	protein_coding	1550.23	-0.122215	0.0583242	-2.09545	0.0361309	0.0723019
IRAG1	ENSG00000072952	protein_coding	857.127	0.737337	0.0762999	9.66368	4.30144e-22	3.24306e-20
TMEM38A	ENSG00000072954	protein_coding	424.577	-0.242858	0.0822562	-2.95246	0.00315249	0.00880754
AP1M1	ENSG00000072958	protein_coding	2372.08	0.0930387	0.0416525	2.23369	0.0255036	0.053755
PVR	ENSG00000073008	protein_coding	2665.06	-0.254711	0.0633784	-4.01889	5.8472e-05	0.000262437
XRCC1	ENSG00000073050	protein_coding	1709.72	-0.163979	0.0477728	-3.43248	0.000598085	0.00205274
SCARB1	ENSG00000073060	protein_coding	2324.42	-0.418127	0.0874076	-4.78365	1.72139e-06	1.0861e-05
CYP2W1	ENSG00000073067	protein_coding	17.6509	0.0813511	0.200473	0.405796	0.684892	0.770084
MCM2	ENSG00000073111	protein_coding	2707.71	-0.50961	0.0856168	-5.95222	2.64533e-09	2.93826e-08
MOV10L1	ENSG00000073146	protein_coding	37.4057	-0.142003	0.132628	-1.07069	0.284307	0.396745
PANX2	ENSG00000073150	protein_coding	813.134	-0.554711	0.123632	-4.48681	7.22977e-06	3.98912e-05
SELENOO	ENSG00000073169	protein_coding	944.89	-0.152963	0.061996	-2.4673	0.0136135	0.0314005
TP63	ENSG00000073282	protein_coding	759.511	1.08976	0.17349	6.28142	3.35497e-10	4.35203e-09
ALPK1	ENSG00000073331	protein_coding	1352.24	0.0902197	0.0547434	1.64805	0.0993429	0.168496
LLGL2	ENSG00000073350	protein_coding	7052.85	-0.234958	0.0702297	-3.34557	0.000821137	0.00271781
PDE8A	ENSG00000073417	protein_coding	1534.96	0.0580041	0.0556395	1.0425	0.29718	0.410848
CLCN4	ENSG00000073464	protein_coding	546.08	0.139706	0.0882827	1.58249	0.113538	0.187996
NLE1	ENSG00000073536	protein_coding	960.445	-0.259826	0.0504368	-5.15151	2.58403e-07	1.94856e-06
SDHA	ENSG00000073578	protein_coding	6113.16	-0.303166	0.0538916	-5.62548	1.84998e-08	1.76653e-07
SMARCE1	ENSG00000073584	protein_coding	3502.7	-0.0509726	0.0383463	-1.32927	0.183759	0.279206
FNDC8	ENSG00000073598	protein_coding	2.64417	-0.164776	0.120488	-1.36758	0.171445	0.264154
GSDMB	ENSG00000073605	protein_coding	1374.52	-0.244935	0.0942532	-2.59869	0.00935813	0.0227368
KDM5A	ENSG00000073614	protein_coding	3300.66	0.0132977	0.0514141	0.25864	0.795913	0.855962
ADAM11	ENSG00000073670	protein_coding	30.392	-0.175174	0.114542	-1.52935	0.126178	0.205187
PPP2R3A	ENSG00000073711	protein_coding	1366.53	-0.0204055	0.0787933	-0.258976	0.795654	0.855762
FERMT2	ENSG00000073712	protein_coding	2244.66	0.295674	0.0586688	5.03972	4.66222e-07	3.3336e-06
ABCB11	ENSG00000073734	protein_coding	9.46373	0.0603535	0.187462	0.32195	0.747491	0.81912
DHRS9	ENSG00000073737	protein_coding	626.36	0.172227	0.155051	1.11077	0.266666	0.377117
CD5L	ENSG00000073754	protein_coding	8.82995	0.82088	0.172429	4.76068	1.92942e-06	1.20438e-05
PTGS2	ENSG00000073756	protein_coding	5548.36	-0.537354	0.158281	-3.39493	0.000686451	0.0023175
IGF2BP2	ENSG00000073792	protein_coding	1371.65	-0.186176	0.121664	-1.53025	0.125955	0.20487
MAP3K13	ENSG00000073803	protein_coding	3165.4	-0.1389	0.0509993	-2.72357	0.00645799	0.0165052
ST6GAL1	ENSG00000073849	protein_coding	6775.97	0.148522	0.0770656	1.92722	0.0539527	0.101297
TBX21	ENSG00000073861	protein_coding	113.836	0.176594	0.113718	1.55292	0.120443	0.197408
VDAC1P1	ENSG00000073905	processed_pseudogene	10.3742	-0.14329	0.0974579	-1.47027	0.141487	0.225639
FRY	ENSG00000073910	protein_coding	1545.51	0.670967	0.0749174	8.95609	3.36387e-19	1.78933e-17
PICALM	ENSG00000073921	protein_coding	9599.85	-0.0406797	0.0406677	-1.00029	0.317168	0.432386
NSF	ENSG00000073969	protein_coding	2985.06	-0.132446	0.0433403	-3.05595	0.00224349	0.00656406
GLI2	ENSG00000074047	protein_coding	277.935	0.520513	0.0887536	5.8647	4.49958e-09	4.80222e-08
CLASP1	ENSG00000074054	protein_coding	3096.28	-0.0179662	0.0419547	-0.428229	0.668485	0.756998
MRPS34	ENSG00000074071	protein_coding	3013.37	-0.289167	0.0576746	-5.01376	5.33752e-07	3.76799e-06
NOTCH3	ENSG00000074181	protein_coding	9737.05	-0.0106782	0.0786859	-0.135707	0.892053	0.92501
CLNS1A	ENSG00000074201	protein_coding	3492.81	-0.268989	0.0424949	-6.32991	2.453e-10	3.24512e-09
PPP2R2C	ENSG00000074211	protein_coding	589.484	-0.887418	0.214902	-4.12942	3.63682e-05	0.000171934
TEAD2	ENSG00000074219	protein_coding	2664.79	-0.136405	0.0744173	-1.83297	0.0668072	0.121232
EED	ENSG00000074266	protein_coding	1015.88	-0.267516	0.0426083	-6.2785	3.4186e-10	4.42795e-09
CDHR2	ENSG00000074276	protein_coding	100.384	-0.253849	0.178435	-1.42264	0.15484	0.242956
SNCB	ENSG00000074317	protein_coding	4.69401	0.564644	0.157848	3.57714	0.000347376	0.00127116
TSG101	ENSG00000074319	protein_coding	3472.68	-0.135289	0.0408907	-3.30856	0.000937762	0.0030633
NCBP3	ENSG00000074356	protein_coding	2301	-0.0128887	0.0508303	-0.253564	0.799833	0.858956
ATP2A3	ENSG00000074370	protein_coding	4711.88	-0.363733	0.109405	-3.32465	0.000885282	0.00290726
CA12	ENSG00000074410	protein_coding	2804.83	-0.784481	0.172194	-4.5558	5.21866e-06	2.9754e-05
MGLL	ENSG00000074416	protein_coding	9937.2	0.298645	0.0853628	3.49854	0.000467816	0.00165086
NTN4	ENSG00000074527	protein_coding	2533.67	0.4688	0.0852533	5.49891	3.82144e-08	3.43707e-07
BCS1L	ENSG00000074582	protein_coding	973.636	-0.278948	0.0405695	-6.87579	6.16469e-12	1.06263e-10
NUAK1	ENSG00000074590	protein_coding	1323.39	0.244467	0.0819004	2.98493	0.00283642	0.00804216
DPP8	ENSG00000074603	protein_coding	1937.91	0.114735	0.0420872	2.72613	0.00640813	0.0163965
SLC24A1	ENSG00000074621	protein_coding	638.064	0.17913	0.0515472	3.47507	0.000510724	0.00178369
ZNF532	ENSG00000074657	protein_coding	3046.79	0.0871741	0.0579261	1.50492	0.132345	0.213341
SCARF1	ENSG00000074660	protein_coding	930.224	0.670097	0.0811269	8.25986	1.45846e-16	5.42258e-15
LMAN1	ENSG00000074695	protein_coding	9845.26	-0.219435	0.0519367	-4.22504	2.38895e-05	0.000117382
HACD3	ENSG00000074696	protein_coding	6140.85	-0.177346	0.0552458	-3.21012	0.00132678	0.00414996
IPCEF1	ENSG00000074706	protein_coding	617.241	0.0759408	0.130208	0.583226	0.559741	0.666591
ZZEF1	ENSG00000074755	protein_coding	2544.31	0.235788	0.0516144	4.56827	4.91775e-06	2.82003e-05
NOX3	ENSG00000074771	protein_coding	0.1975	-0.024214	0.405445	-0.0597221	0.952377
ENO1	ENSG00000074800	protein_coding	91693.5	-0.302083	0.061312	-4.92697	8.35149e-07	5.66506e-06
SLC12A1	ENSG00000074803	protein_coding	3.97581	0.140503	0.189873	0.739987	0.459308	0.574791
MYDGF	ENSG00000074842	protein_coding	5614.66	-0.341298	0.0618282	-5.52011	3.3879e-08	3.08037e-07
ANO8	ENSG00000074855	protein_coding	923.863	-0.264033	0.0725717	-3.63823	0.000274513	0.00102929
TUBE1	ENSG00000074935	protein_coding	481.769	0.110266	0.0523587	2.10597	0.0352068	0.0707368
ARHGEF10L	ENSG00000074964	protein_coding	2056.99	-0.0866884	0.0617573	-1.4037	0.16041	0.25021
TXK	ENSG00000074966	protein_coding	93.2141	0.611187	0.0960749	6.36157	1.99701e-10	2.67783e-09
WSCD2	ENSG00000075035	protein_coding	30	1.51562	0.118179	12.8248	1.19076e-37	2.98391e-35
KCNQ2	ENSG00000075043	protein_coding	39.1484	-1.22069	0.252779	-4.82909	1.37159e-06	8.84708e-06
TACR2	ENSG00000075073	protein_coding	55.3042	-0.295549	0.104339	-2.83258	0.00461741	0.0123075
ACTR6	ENSG00000075089	protein_coding	1055.99	-0.297997	0.0463711	-6.42636	1.30697e-10	1.81835e-09
TIPIN	ENSG00000075131	protein_coding	288.565	-0.284165	0.0524682	-5.41595	6.09636e-08	5.24801e-07
SRI	ENSG00000075142	protein_coding	5980.41	-0.193608	0.0639868	-3.02574	0.00248023	0.0071677
EIF4G3	ENSG00000075151	protein_coding	3665.34	0.0148161	0.0440843	0.336086	0.736806	0.810773
NUP37	ENSG00000075188	protein_coding	972.421	-0.464644	0.0538472	-8.62892	6.19342e-18	2.81739e-16
SEMA3A	ENSG00000075213	protein_coding	1214.67	-0.0273781	0.146698	-0.186629	0.851952	0.896539
GTSE1	ENSG00000075218	protein_coding	537.337	-0.722517	0.0949382	-7.61039	2.73262e-14	7.00975e-13
SEMA3C	ENSG00000075223	protein_coding	3265.97	0.161735	0.100873	1.60335	0.108857	0.181611
TTC38	ENSG00000075234	protein_coding	1477.43	-0.00186774	0.0534203	-0.034963	0.972109	0.981254
ACAT1	ENSG00000075239	protein_coding	2557.22	-0.196603	0.0663238	-2.96429	0.0030338	0.00852097
GRAMD4	ENSG00000075240	protein_coding	3558.91	-0.525886	0.0707397	-7.4341	1.05284e-13	2.48869e-12
CELSR1	ENSG00000075275	protein_coding	7148.8	-0.0170685	0.0706165	-0.241706	0.809008	0.865502
WNT8B	ENSG00000075290	protein_coding	11.663	-0.117996	0.125819	-0.937825	0.348334	0.464818
ZNF638	ENSG00000075292	protein_coding	4869.2	-0.0339143	0.0450194	-0.753325	0.451254	0.567169
SLC25A40	ENSG00000075303	protein_coding	1029.19	-0.174569	0.0471577	-3.70182	0.000214061	0.000824373
TIMM21	ENSG00000075336	protein_coding	734.685	-0.259631	0.0433084	-5.99493	2.03571e-09	2.31148e-08
ADD2	ENSG00000075340	protein_coding	193.579	0.0985286	0.137793	0.715047	0.47458	0.588922
FGF4	ENSG00000075388	protein_coding	0.776823	-1.91687	0.395175	-4.85068	1.2304e-06	8.02592e-06
RASAL2	ENSG00000075391	protein_coding	1875.93	0.147265	0.068142	2.16115	0.0306834	0.0629377
VPS9D1	ENSG00000075399	protein_coding	1123.78	-0.317547	0.0612976	-5.18042	2.21387e-07	1.6924e-06
ZNF37A	ENSG00000075407	protein_coding	1083.87	-0.0255831	0.0601047	-0.425642	0.670369	0.758462
MARK3	ENSG00000075413	protein_coding	3113.43	-0.10398	0.0369714	-2.81245	0.00491658	0.0129886
SLC25A3	ENSG00000075415	protein_coding	14409.1	-0.243559	0.0422631	-5.76293	8.26665e-09	8.41455e-08
FNDC3B	ENSG00000075420	protein_coding	7020.94	-0.162994	0.0618276	-2.63626	0.00838245	0.020671
FOSL2	ENSG00000075426	protein_coding	9258.41	0.0140558	0.0691622	0.203229	0.838956	0.886802
CACNG5	ENSG00000075429	protein_coding	1.45234	-0.293363	0.288352	-1.01738	0.308973	0.42345
CACNG4	ENSG00000075461	protein_coding	855.062	0.21182	0.180064	1.17636	0.23945	0.345883
FRYL	ENSG00000075539	protein_coding	2547.41	0.23258	0.0623967	3.72744	0.000193436	0.000753647
TMEM131	ENSG00000075568	protein_coding	4104.28	0.00162671	0.0423962	0.0383692	0.969393	0.97949
FSCN1	ENSG00000075618	protein_coding	5702.63	-0.0220311	0.116688	-0.188804	0.850247	0.895309
ACTB	ENSG00000075624	protein_coding	272002	-0.0151303	0.0486158	-0.311222	0.755632	0.825188
MOCOS	ENSG00000075643	protein_coding	923.67	-0.325896	0.0853561	-3.81808	0.000134496	0.00054866
PLD1	ENSG00000075651	protein_coding	983.878	-0.144568	0.0745267	-1.93982	0.0524019	0.0988438
ATP12A	ENSG00000075673	protein_coding	129.388	0.352337	0.211265	1.66775	0.0953662	0.162823
WDR62	ENSG00000075702	protein_coding	642.389	-0.615935	0.100151	-6.15008	7.74459e-10	9.47892e-09
DLG1	ENSG00000075711	protein_coding	2809.71	-0.0674064	0.0475254	-1.41832	0.156096	0.244511
RAB7A	ENSG00000075785	protein_coding	12417.6	-0.134289	0.0408184	-3.28993	0.00100214	0.00325063
BCAP29	ENSG00000075790	protein_coding	2837.73	-0.118948	0.0523477	-2.27227	0.0230703	0.0493801
SEC31B	ENSG00000075826	protein_coding	324.958	0.214193	0.0987917	2.16813	0.0301487	0.0619964
SART3	ENSG00000075856	protein_coding	2598.68	-0.187316	0.0347603	-5.38879	7.09334e-08	6.03435e-07
ARHGAP15	ENSG00000075884	protein_coding	488.761	0.57484	0.0815646	7.04766	1.81947e-12	3.44144e-11
TUBA3D	ENSG00000075886	protein_coding	16.0106	-0.370662	0.0890557	-4.16214	3.15284e-05	0.000151046
PAX2	ENSG00000075891	protein_coding	1.58328	-0.673991	0.265953	-2.53425	0.0112687	0.0266966
EXOSC7	ENSG00000075914	protein_coding	1349.07	-0.0932635	0.0429307	-2.17242	0.0298239	0.0614362
KIFAP3	ENSG00000075945	protein_coding	1888.4	0.061223	0.0432378	1.41596	0.156788	0.245381
MKRN2	ENSG00000075975	protein_coding	1221.37	0.00699711	0.0312685	0.223775	0.822933	0.875114
MCM6	ENSG00000076003	protein_coding	2693.49	-0.472639	0.067247	-7.0284	2.08918e-12	3.91062e-11
REXO2	ENSG00000076043	protein_coding	2243.87	-0.141308	0.0437438	-3.23036	0.00123635	0.00390345
RBM7	ENSG00000076053	protein_coding	1409.02	-0.0833728	0.0439093	-1.89875	0.0575974	0.107033
RBMS2	ENSG00000076067	protein_coding	3269.78	0.350869	0.0529849	6.62205	3.54259e-11	5.40009e-10
BAZ2A	ENSG00000076108	protein_coding	6910.89	-0.204351	0.0488225	-4.18559	2.84428e-05	0.000137541
PTPN23	ENSG00000076201	protein_coding	3416.01	-0.0731809	0.0446169	-1.6402	0.100963	0.170747
MLH1	ENSG00000076242	protein_coding	1543.23	0.00863622	0.0332436	0.259786	0.795029	0.855238
UNG	ENSG00000076248	protein_coding	1954.71	-0.447573	0.0553557	-8.0854	6.19612e-16	2.09364e-14
FMO4	ENSG00000076258	protein_coding	233.026	0.35005	0.073825	4.74161	2.12026e-06	1.31273e-05
KLHL20	ENSG00000076321	protein_coding	1092	0.20454	0.0387108	5.28378	1.26545e-07	1.02047e-06
RGS11	ENSG00000076344	protein_coding	181.154	0.073023	0.122771	0.59479	0.551984	0.659601
SLC46A1	ENSG00000076351	protein_coding	631.646	0.0182219	0.0584017	0.31201	0.755033	0.824738
PLXNA2	ENSG00000076356	protein_coding	3546.05	0.533988	0.0913298	5.84681	5.01086e-09	5.29814e-08
SPAG5	ENSG00000076382	protein_coding	1546.2	-0.796626	0.0895068	-8.90017	5.57598e-19	2.87774e-17
ANKRD13A	ENSG00000076513	protein_coding	3475.27	0.0619694	0.0480956	1.28846	0.197586	0.295776
TPD52	ENSG00000076554	protein_coding	5977.58	-0.7139	0.0746041	-9.56919	1.07747e-21	7.77215e-20
ACACB	ENSG00000076555	protein_coding	678.933	0.403945	0.0745349	5.41955	5.97505e-08	5.15238e-07
TRAF4	ENSG00000076604	protein_coding	5456.98	-0.384994	0.0558562	-6.89259	5.47855e-12	9.55374e-11
PAG1	ENSG00000076641	protein_coding	2492.9	0.204252	0.0906723	2.25264	0.024282	0.0515461
GPATCH1	ENSG00000076650	protein_coding	627.879	-0.235058	0.046212	-5.08651	3.64712e-07	2.66179e-06
ICAM3	ENSG00000076662	protein_coding	179.543	0.381414	0.0930654	4.09835	4.16112e-05	0.00019377
NT5C2	ENSG00000076685	protein_coding	2153.33	0.016639	0.0509111	0.326824	0.743801	0.816439
MCAM	ENSG00000076706	protein_coding	4421.21	0.394309	0.0800316	4.92692	8.35359e-07	5.66533e-06
GPC4	ENSG00000076716	protein_coding	5932.29	0.17377	0.0951756	1.82578	0.0678831	0.12286
MBNL3	ENSG00000076770	protein_coding	1206.93	0.383167	0.0814231	4.70588	2.52779e-06	1.54019e-05
CAMSAP3	ENSG00000076826	protein_coding	1508.18	-0.257156	0.0701236	-3.66717	0.000245246	0.00093029
RAP1GAP	ENSG00000076864	protein_coding	4742.89	0.220109	0.125171	1.75847	0.0786672	0.138995
XAB2	ENSG00000076924	protein_coding	2464.45	-0.0404091	0.0470159	-0.859478	0.390077	0.507606
ARHGEF1	ENSG00000076928	protein_coding	6067.43	0.121881	0.060791	2.00491	0.0449725	0.0870534
STXBP2	ENSG00000076944	protein_coding	2981.69	-0.146668	0.0518674	-2.82774	0.00468779	0.0124624
MAP2K7	ENSG00000076984	protein_coding	1680.06	-0.0523795	0.0431139	-1.21491	0.224401	0.328079
NMRK2	ENSG00000077009	protein_coding	2.14295	0.283559	0.208993	1.35679	0.174848	0.268348
DGKD	ENSG00000077044	protein_coding	3147.18	0.0941282	0.0702741	1.33944	0.180426	0.275243
CTTNBP2	ENSG00000077063	protein_coding	122.766	0.60692	0.113593	5.34296	9.14416e-08	7.58404e-07
ACTL6B	ENSG00000077080	protein_coding	1.98477	-0.511985	0.211137	-2.42489	0.015313	0.0347365
RARB	ENSG00000077092	protein_coding	364.889	0.24648	0.0815031	3.02417	0.00249313	0.00720019
TOP2B	ENSG00000077097	protein_coding	6072.24	0.108013	0.0433096	2.49396	0.0126325	0.0294544
TM9SF3	ENSG00000077147	protein_coding	13066.5	0.0298428	0.0489991	0.609048	0.542493	0.651112
NFKB2	ENSG00000077150	protein_coding	3260.85	-0.205431	0.0612617	-3.35334	0.000798424	0.00264911
UBE2T	ENSG00000077152	protein_coding	932.17	-0.862193	0.0885141	-9.74074	2.02074e-22	1.59859e-20
PPP1R12B	ENSG00000077157	protein_coding	3263.43	0.403173	0.0843702	4.77862	1.765e-06	1.11135e-05
DNAJC10	ENSG00000077232	protein_coding	7893.01	-0.335631	0.0561042	-5.98227	2.20045e-09	2.4797e-08
GTF3C1	ENSG00000077235	protein_coding	5340.56	-0.0135309	0.043581	-0.310478	0.756197	0.82561
IL4R	ENSG00000077238	protein_coding	4669.87	0.0395774	0.0529479	0.747478	0.454775	0.57037
USP33	ENSG00000077254	protein_coding	2888.26	-0.0166087	0.0412236	-0.402893	0.687027	0.771787
PAK3	ENSG00000077264	protein_coding	291.575	-0.578504	0.179568	-3.22164	0.00127458	0.00400437
CAPN6	ENSG00000077274	protein_coding	323.447	1.01444	0.212453	4.77491	1.7979e-06	1.12978e-05
DCX	ENSG00000077279	protein_coding	2.24157	0.307952	0.252483	1.2197	0.22258	0.325857
SNRPA	ENSG00000077312	protein_coding	2631.77	-0.335653	0.0455392	-7.37065	1.69802e-13	3.84972e-12
SPAG6	ENSG00000077327	protein_coding	346.799	1.4486	0.191055	7.58208	3.40066e-14	8.64159e-13
EXOSC5	ENSG00000077348	protein_coding	1006.39	-0.405632	0.0704902	-5.75445	8.69238e-09	8.82304e-08
DYNC1I2	ENSG00000077380	protein_coding	3796.08	-0.0619151	0.0367884	-1.683	0.0923743	0.158542
APBB1IP	ENSG00000077420	protein_coding	938.668	0.352597	0.0788064	4.47422	7.66918e-06	4.19897e-05
LRCH4	ENSG00000077454	protein_coding	1115.08	-0.00796945	0.0563643	-0.141392	0.88756	0.922169
FAM76B	ENSG00000077458	protein_coding	794.366	-0.065842	0.0451109	-1.45956	0.144411	0.229499
SIRT6	ENSG00000077463	protein_coding	846.155	-0.229054	0.0548445	-4.17642	2.96133e-05	0.000142644
TYR	ENSG00000077498	protein_coding	1.11377	0.709087	0.311939	2.27316	0.0230167	0.0492726
POLD3	ENSG00000077514	protein_coding	1188.9	-0.204675	0.0404332	-5.06204	4.14786e-07	2.99647e-06
ACTN2	ENSG00000077522	protein_coding	35.2532	1.65131	0.120529	13.7005	1.00842e-42	3.49735e-40
CAPZB	ENSG00000077549	protein_coding	11010.7	0.01434	0.0423501	0.338605	0.734907	0.809259
GPR137B	ENSG00000077585	protein_coding	1021.16	0.162107	0.0645103	2.51289	0.0119748	0.0281235
NAALAD2	ENSG00000077616	protein_coding	69.7518	0.724671	0.0883233	8.20475	2.31063e-16	8.31982e-15
JADE1	ENSG00000077684	protein_coding	2177.64	-0.221948	0.073446	-3.02192	0.00251174	0.00724863
SLC25A43	ENSG00000077713	protein_coding	1413.42	-0.0787975	0.053562	-1.47115	0.141252	0.225304
UBE2A	ENSG00000077721	protein_coding	3713.43	-0.050428	0.045668	-1.10423	0.269493	0.380197
FGFR1	ENSG00000077782	protein_coding	2957.05	0.188414	0.0919617	2.04883	0.0404785	0.0796742
FKBP6	ENSG00000077800	protein_coding	3.56797	0.0153889	0.142474	0.108012	0.913986	0.940698
SMC1B	ENSG00000077935	protein_coding	112.71	-0.235747	0.178997	-1.31704	0.187824	0.284256
FBLN1	ENSG00000077942	protein_coding	7780.7	0.857305	0.08873	9.66195	4.3745e-22	3.28671e-20
ITGA8	ENSG00000077943	protein_coding	821.397	1.6196	0.0817174	19.8196	2.01903e-87	1.25042e-83
CST7	ENSG00000077984	protein_coding	549.876	0.263592	0.106991	2.46369	0.0137515	0.0316697
MAP2	ENSG00000078018	protein_coding	1913.2	-0.134887	0.128012	-1.0537	0.29202	0.405096
PIAS2	ENSG00000078043	protein_coding	1120.45	-0.100583	0.0624322	-1.61107	0.107164	0.179298
AMPH	ENSG00000078053	protein_coding	130.401	-0.105266	0.156069	-0.674483	0.500004	0.612962
ARAF	ENSG00000078061	protein_coding	3922.71	-0.0152941	0.0456351	-0.335138	0.737521	0.811271
MCCC1	ENSG00000078070	protein_coding	1741.67	0.0680923	0.0641215	1.06193	0.28827	0.40092
LAMP3	ENSG00000078081	protein_coding	5064.23	0.983996	0.115185	8.54277	1.31042e-17	5.66961e-16
FAP	ENSG00000078098	protein_coding	1136.53	0.276084	0.105261	2.62286	0.00871958	0.0213771
NEBL	ENSG00000078114	protein_coding	2999.5	0.246083	0.0893556	2.75397	0.00588765	0.0152419
ACER3	ENSG00000078124	protein_coding	1585.31	0.0718207	0.0505936	1.41956	0.155735	0.244043
UBE2K	ENSG00000078140	protein_coding	4859.21	-0.249862	0.044146	-5.65989	1.51467e-08	1.47162e-07
PIK3C3	ENSG00000078142	protein_coding	1451.1	0.141292	0.0502418	2.81224	0.00491976	0.0129939
N4BP2	ENSG00000078177	protein_coding	1076.96	-0.0673326	0.0721968	-0.932625	0.351014	0.4675
TIGAR	ENSG00000078237	protein_coding	633.331	-0.134233	0.0515222	-2.60535	0.00917801	0.0223456
TULP3	ENSG00000078246	protein_coding	1295.47	-0.179727	0.0466328	-3.8541	0.000116158	0.000482023
SYNJ2	ENSG00000078269	protein_coding	1470.14	-0.0581327	0.0644102	-0.902537	0.366771	0.483822
ADCY2	ENSG00000078295	protein_coding	71.0561	1.58378	0.144329	10.9734	5.12873e-28	6.79941e-26
PPP2R5C	ENSG00000078304	protein_coding	6773.06	0.0168976	0.0408771	0.413375	0.679332	0.765449
PMS2P1	ENSG00000078319	transcribed_unprocessed_pseudogene	377.537	-0.330622	0.0627225	-5.27119	1.35541e-07	1.08393e-06
RBFOX1	ENSG00000078328	protein_coding	14.7288	0.167086	0.314494	0.531286	0.595221	0.696841
GNB1	ENSG00000078369	protein_coding	19394.2	-0.047765	0.0378401	-1.26228	0.206847	0.307054
HOXA9	ENSG00000078399	protein_coding	21.6059	-0.578543	0.143293	-4.03748	5.40288e-05	0.000244494
EDN1	ENSG00000078401	protein_coding	1211.77	0.612677	0.104553	5.85998	4.62911e-09	4.92832e-08
MLLT10	ENSG00000078403	protein_coding	1409.59	-0.0264557	0.043202	-0.612373	0.540291	0.649385
ZCWPW1	ENSG00000078487	protein_coding	281.963	0.100404	0.0721367	1.39186	0.163964	0.254662
ADCYAP1R1	ENSG00000078549	protein_coding	33.742	1.17519	0.107783	10.9033	1.11151e-27	1.41308e-25
FGF20	ENSG00000078579	protein_coding	11.56	-0.166846	0.18411	-0.906227	0.364816	0.481959
P2RY10	ENSG00000078589	protein_coding	164.317	0.518964	0.103438	5.01716	5.24419e-07	3.71056e-06
ITM2A	ENSG00000078596	protein_coding	873.398	0.787576	0.0817183	9.63769	5.54222e-22	4.09313e-20
NRDC	ENSG00000078618	protein_coding	6810.06	-0.240516	0.0367919	-6.53719	6.26848e-11	9.19944e-10
VDAC3	ENSG00000078668	protein_coding	4482.62	-0.276299	0.0659962	-4.18659	2.83173e-05	0.00013698
PCM1	ENSG00000078674	protein_coding	6152.68	-0.0132626	0.0667643	-0.198647	0.842539	0.889635
TNRC6C	ENSG00000078687	protein_coding	922.588	0.213955	0.0625064	3.42294	0.000619486	0.00211732
CBFA2T2	ENSG00000078699	protein_coding	1834.13	-0.187029	0.0538868	-3.47077	0.000518962	0.00180823
BRINP1	ENSG00000078725	protein_coding	416.405	0.261027	0.232427	1.12305	0.261417	0.371104
ITCH	ENSG00000078747	protein_coding	3670.14	-0.0356182	0.0447082	-0.796682	0.425636	0.542439
PKD2L2	ENSG00000078795	protein_coding	14.6124	0.399645	0.128887	3.10074	0.00193037	0.0057722
TP53INP2	ENSG00000078804	protein_coding	2478.61	-0.261392	0.075761	-3.45022	0.000560136	0.00193877
SDF4	ENSG00000078808	protein_coding	7659.28	-0.0975371	0.0498117	-1.95812	0.0502163	0.095402
MYH7B	ENSG00000078814	protein_coding	112.998	-0.146218	0.106443	-1.37367	0.169544	0.261746
BPIFB2	ENSG00000078898	protein_coding	543.465	-1.66065	0.274507	-6.04956	1.45242e-09	1.69947e-08
TP73	ENSG00000078900	protein_coding	310.668	0.315461	0.102936	3.06465	0.00217927	0.00639776
TOLLIP	ENSG00000078902	protein_coding	2899.08	-0.0431975	0.0446133	-0.968264	0.332913	0.449021
UBE2D4	ENSG00000078967	protein_coding	1106.08	-0.0657732	0.0439199	-1.49757	0.134245	0.215939
CLUL1	ENSG00000079101	protein_coding	111.082	0.661886	0.134178	4.93288	8.10256e-07	5.50953e-06
RUNX1T1	ENSG00000079102	protein_coding	266.362	0.988952	0.0915327	10.8044	3.28215e-27	4.04227e-25
CDH17	ENSG00000079112	protein_coding	618.273	-1.31945	0.221757	-5.94997	2.68188e-09	2.97733e-08
THOC1	ENSG00000079134	protein_coding	1147.67	-0.199802	0.0518322	-3.85478	0.000115834	0.00048086
FKBP7	ENSG00000079150	protein_coding	620.482	0.228519	0.0572772	3.98969	6.61583e-05	0.000292663
OSBPL6	ENSG00000079156	protein_coding	342.179	0.868806	0.109397	7.94181	1.99254e-15	6.28221e-14
SLC1A3	ENSG00000079215	protein_coding	754.775	0.527104	0.0972414	5.42057	5.9409e-08	5.12664e-07
XRCC5	ENSG00000079246	protein_coding	14792.3	-0.125656	0.0376798	-3.33484	0.000853493	0.00281416
LXN	ENSG00000079257	protein_coding	860.274	0.142119	0.0676643	2.10036	0.0356971	0.0715494
SP140	ENSG00000079263	protein_coding	396.72	0.130017	0.0955471	1.36076	0.173589	0.26685
MKNK1	ENSG00000079277	protein_coding	1679.07	0.0731646	0.0376564	1.94295	0.0520219	0.0982723
TNS1	ENSG00000079308	protein_coding	11796.3	0.820187	0.0715169	11.4684	1.90069e-30	3.00725e-28
REXO1	ENSG00000079313	protein_coding	1438.36	-0.139741	0.0501861	-2.78446	0.00536171	0.01401
SAR1A	ENSG00000079332	protein_coding	5800.85	-0.0393842	0.0337875	-1.16564	0.243759	0.350798
CDC14A	ENSG00000079335	protein_coding	388.231	0.49293	0.0689472	7.14939	8.71615e-13	1.75342e-11
RAPGEF3	ENSG00000079337	protein_coding	713.791	0.220294	0.0846915	2.60113	0.00929161	0.0225942
CEACAM1	ENSG00000079385	protein_coding	2862.05	-0.31901	0.0966034	-3.30227	0.000959067	0.00312474
SENP1	ENSG00000079387	protein_coding	1076.91	-0.222224	0.0440914	-5.04007	4.65355e-07	3.32851e-06
DUSP13	ENSG00000079393	protein_coding	127.53	-1.18605	0.222977	-5.31917	1.04244e-07	8.54286e-07
CIC	ENSG00000079432	protein_coding	4266.92	0.0687962	0.0524896	1.31066	0.189971	0.286886
LIPE	ENSG00000079435	protein_coding	241.54	-0.160138	0.0854388	-1.8743	0.0608889	0.112159
FDFT1	ENSG00000079459	protein_coding	6196.15	-0.127098	0.069621	-1.82558	0.0679142	0.122896
PAFAH1B3	ENSG00000079462	protein_coding	1788.6	-0.626065	0.0798489	-7.84062	4.48331e-15	1.32545e-13
OPHN1	ENSG00000079482	protein_coding	798.821	0.34435	0.0782687	4.39959	1.08453e-05	5.77033e-05
AFM	ENSG00000079557	protein_coding	0.979566	-0.388745	0.277315	-1.40181	0.160971	0.250922
KIF22	ENSG00000079616	protein_coding	2420.25	-0.396161	0.0556672	-7.1166	1.10623e-12	2.17493e-11
SCGN	ENSG00000079689	protein_coding	8.58004	-0.265644	0.26522	-1.0016	0.316538	0.431717
CARMIL1	ENSG00000079691	protein_coding	1577.8	0.0312492	0.0582031	0.536898	0.591338	0.693494
PGM1	ENSG00000079739	protein_coding	4322.47	-0.0954354	0.0570191	-1.67374	0.094181	0.161139
DDX1	ENSG00000079785	protein_coding	4979.15	-0.2083	0.0397783	-5.23653	1.63626e-07	1.28716e-06
DNM2	ENSG00000079805	protein_coding	7958.73	0.0758366	0.0424215	1.78769	0.0738255	0.131859
EPB41L2	ENSG00000079819	protein_coding	2124.23	0.754222	0.0666652	11.3136	1.12411e-29	1.722e-27
RIMS1	ENSG00000079841	protein_coding	121.716	0.0551917	0.190117	0.290305	0.771583	0.837184
MOXD1	ENSG00000079931	protein_coding	2094.63	0.879089	0.0871889	10.0826	6.5975e-24	5.92163e-22
STX7	ENSG00000079950	protein_coding	3070.48	0.252374	0.0450944	5.59657	2.1864e-08	2.05607e-07
RABL2B	ENSG00000079974	protein_coding	809.907	0.157402	0.0555789	2.83205	0.00462512	0.012323
KEAP1	ENSG00000079999	protein_coding	3301.11	-0.135976	0.0540663	-2.51499	0.0119036	0.0279715
DDX43	ENSG00000080007	protein_coding	124.751	0.070334	0.178334	0.394396	0.693289	0.776968
PTPRH	ENSG00000080031	protein_coding	837.242	-0.605703	0.149473	-4.05226	5.0725e-05	0.000231015
DCT	ENSG00000080166	protein_coding	11.2321	0.501816	0.144302	3.47754	0.000506032	0.00176816
SLC35C2	ENSG00000080189	protein_coding	3162.27	-0.187889	0.0423413	-4.43749	9.10157e-06	4.91678e-05
CRYBG3	ENSG00000080200	protein_coding	1197.6	0.00708443	0.0934003	0.0758503	0.939538	0.959124
EPHA6	ENSG00000080224	protein_coding	27.5544	-0.656598	0.209072	-3.14054	0.00168639	0.00511965
SCTR	ENSG00000080293	protein_coding	1017.84	0.761231	0.169904	4.48036	7.4517e-06	4.09801e-05
RFX3	ENSG00000080298	protein_coding	627.141	0.28545	0.083403	3.42253	0.000620408	0.00212029
RIF1	ENSG00000080345	protein_coding	3037.86	-0.0577061	0.0573324	-1.00652	0.314166	0.429171
RAB21	ENSG00000080371	protein_coding	3316.37	0.0846744	0.0456	1.85689	0.0633263	0.115905
SLC4A4	ENSG00000080493	protein_coding	1831.59	0.219533	0.126477	1.73576	0.0826069	0.144688
SMARCA2	ENSG00000080503	protein_coding	3697.88	0.473157	0.0577047	8.19964	2.41113e-16	8.66009e-15
RDH8	ENSG00000080511	protein_coding	0.712006	-0.55424	0.280705	-1.97446	0.0483297	0.0924458
SESN1	ENSG00000080546	protein_coding	939.293	0.630394	0.0600311	10.5011	8.53528e-26	9.13633e-24
MID2	ENSG00000080561	protein_coding	362.862	0.160643	0.0677042	2.37272	0.0176577	0.0393127
DNAAF6	ENSG00000080572	protein_coding	32.8296	1.75907	0.213308	8.24664	1.62909e-16	6.01572e-15
COL5A3	ENSG00000080573	protein_coding	973.163	0.264725	0.106384	2.48838	0.0128326	0.0298534
SRCAP	ENSG00000080603	protein_coding	9513.46	-0.105633	0.0369265	-2.86063	0.00422798	0.0113942
PUM3	ENSG00000080608	protein_coding	1448.44	-0.275658	0.053482	-5.15421	2.54704e-07	1.92401e-06
CPB2	ENSG00000080618	protein_coding	273.385	1.6227	0.210221	7.719	1.17242e-14	3.19867e-13
CHRNA3	ENSG00000080644	protein_coding	33.31	-0.525326	0.132897	-3.95287	7.72204e-05	0.000336043
KCNN2	ENSG00000080709	protein_coding	89.178	0.149719	0.101486	1.47527	0.14014	0.223786
CNOT4	ENSG00000080802	protein_coding	1120.03	-0.0296992	0.0362253	-0.819845	0.412304	0.529293
PSEN1	ENSG00000080815	protein_coding	4711.79	-0.0284694	0.035265	-0.807298	0.419495	0.536258
CPOX	ENSG00000080819	protein_coding	1260.61	-0.296663	0.0534802	-5.54716	2.90352e-08	2.67247e-07
CLDND1	ENSG00000080822	protein_coding	3078.57	-0.182341	0.0493843	-3.69229	0.000222248	0.000852344
MOK	ENSG00000080823	protein_coding	474.558	-0.0344767	0.0725819	-0.475004	0.634784	0.729351
HSP90AA1	ENSG00000080824	protein_coding	51716.8	-0.243619	0.0554399	-4.39428	1.1114e-05	5.89737e-05
RBL1	ENSG00000080839	protein_coding	694.458	-0.30945	0.063601	-4.86549	1.14173e-06	7.49376e-06
DLGAP4	ENSG00000080845	protein_coding	4939.04	-0.14159	0.0497166	-2.84794	0.00440035	0.0118032
IGSF9B	ENSG00000080854	protein_coding	189.279	0.549522	0.144971	3.79055	0.000150311	0.000604256
CFHR2	ENSG00000080910	protein_coding	0.0458407	-0.405289	2.56092	-0.158259	0.874253
CROCCP3	ENSG00000080947	transcribed_unprocessed_pseudogene	182.594	0.193619	0.0879541	2.20136	0.0277103	0.0577019
NDC80	ENSG00000080986	protein_coding	592.595	-0.61624	0.101842	-6.05094	1.44007e-09	1.68639e-08
AP4E1	ENSG00000081014	protein_coding	687.37	0.0847556	0.0456476	1.85674	0.0633485	0.115941
RSBN1	ENSG00000081019	protein_coding	1214.23	0.228056	0.0461437	4.94229	7.72092e-07	5.27814e-06
MAGI3	ENSG00000081026	protein_coding	2250.68	0.321852	0.081162	3.96555	7.32278e-05	0.00032034
CXCL2	ENSG00000081041	protein_coding	1761.54	0.37214	0.121375	3.06604	0.00216913	0.006371
AFP	ENSG00000081051	protein_coding	13.5576	-1.92623	0.283408	-6.79666	1.07076e-11	1.7792e-10
COL4A4	ENSG00000081052	protein_coding	1515.49	0.614229	0.106782	5.75219	8.8093e-09	8.92917e-08
TCF7	ENSG00000081059	protein_coding	785.46	0.414842	0.0763713	5.43191	5.57554e-08	4.84002e-07
OSTM1	ENSG00000081087	protein_coding	1634.53	0.202194	0.0511975	3.9493	7.83803e-05	0.000340612
CDH7	ENSG00000081138	protein_coding	20.0481	-0.292078	0.253397	-1.15265	0.249055	0.356691
IMPG2	ENSG00000081148	protein_coding	19.2083	0.199269	0.101271	1.96768	0.0491051	0.0937097
PCNP	ENSG00000081154	protein_coding	5810.17	-0.0743354	0.0423041	-1.75717	0.0788894	0.139314
EXD2	ENSG00000081177	protein_coding	1471.91	-0.0728635	0.0395711	-1.84133	0.0655728	0.119326
ARG2	ENSG00000081181	protein_coding	337.415	-0.475062	0.106968	-4.44117	8.9472e-06	4.84485e-05
MEF2C	ENSG00000081189	protein_coding	1816.85	0.748905	0.07695	9.73236	2.19441e-22	1.72967e-20
PTPRC	ENSG00000081237	protein_coding	4183.52	0.576363	0.0932611	6.1801	6.40604e-10	7.95289e-09
CACNA1S	ENSG00000081248	protein_coding	5.23141	0.899736	0.195745	4.59646	4.29721e-06	2.49155e-05
PKP1	ENSG00000081277	protein_coding	1907.63	0.152413	0.214194	0.711568	0.476732	0.59095
UBA5	ENSG00000081307	protein_coding	1725.47	-0.182756	0.0392971	-4.65061	3.30952e-06	1.96702e-05
STK17B	ENSG00000081320	protein_coding	4537.71	0.282831	0.0624847	4.5264	5.99974e-06	3.36962e-05
CDC14B	ENSG00000081377	protein_coding	1086.24	0.127498	0.0560509	2.27468	0.0229254	0.0491111
ZNF510	ENSG00000081386	protein_coding	526.83	0.130561	0.0469328	2.78187	0.00540467	0.0141096
LRP2	ENSG00000081479	protein_coding	1239.82	-0.309697	0.18004	-1.72016	0.085404	0.148688
ZNF506	ENSG00000081665	protein_coding	762.863	0.205369	0.0718494	2.85832	0.00425884	0.0114655
JMJD4	ENSG00000081692	protein_coding	865.507	-0.355697	0.0479618	-7.41626	1.20476e-13	2.80799e-12
DUSP12	ENSG00000081721	protein_coding	832.243	-0.266323	0.0403947	-6.59304	4.30924e-11	6.46192e-10
AACS	ENSG00000081760	protein_coding	2166.45	-0.476099	0.0567448	-8.39019	4.8537e-17	1.9269e-15
DELE1	ENSG00000081791	protein_coding	2614.38	0.150381	0.0425688	3.53265	0.000411409	0.00147412
SLC13A1	ENSG00000081800	protein_coding	0.552751	-0.856584	0.328244	-2.60959	0.00906498	0.0221076
CADPS2	ENSG00000081803	protein_coding	3311.72	0.0869385	0.06959	1.2493	0.211556	0.312675
PCDHB4	ENSG00000081818	protein_coding	121.379	0.520875	0.0861429	6.04664	1.479e-09	1.72684e-08
PCDHA6	ENSG00000081842	protein_coding	46.9585	0.635032	0.172326	3.68506	0.00022865	0.000874034
PCDHGA2	ENSG00000081853	protein_coding	147.884	-0.105789	0.127391	-0.830428	0.406297	0.523456
HSPB11	ENSG00000081870	protein_coding	957.377	-0.282845	0.0500054	-5.6563	1.54673e-08	1.49975e-07
PHLPP1	ENSG00000081913	protein_coding	995.07	-0.188044	0.0648868	-2.89804	0.00375504	0.0102583
ATP8B1	ENSG00000081923	protein_coding	3712.29	-0.31963	0.081763	-3.90923	9.25926e-05	0.000394504
IL12RB2	ENSG00000081985	protein_coding	67.3021	-0.486253	0.133353	-3.64637	0.000265969	0.000999939
SMARCD3	ENSG00000082014	protein_coding	1239.63	0.0934807	0.0827611	1.12952	0.258677	0.368027
WDR70	ENSG00000082068	protein_coding	1484.26	-0.106647	0.0459953	-2.31865	0.0204139	0.0445074
FYB1	ENSG00000082074	protein_coding	1755.98	0.404383	0.0942497	4.29055	1.78227e-05	9.01051e-05
MPP4	ENSG00000082126	protein_coding	5.89078	0.190784	0.119189	1.60068	0.109448	0.182471
STRADB	ENSG00000082146	protein_coding	817.534	-0.107595	0.0593597	-1.8126	0.069894	0.125921
BZW1	ENSG00000082153	protein_coding	7811.52	-0.327595	0.0575954	-5.68788	1.28629e-08	1.26562e-07
PGR	ENSG00000082175	protein_coding	135.939	1.35675	0.102644	13.2181	6.89978e-40	2.02108e-37
C1QTNF3	ENSG00000082196	protein_coding	411.151	0.443873	0.115016	3.85922	0.000113749	0.00047275
ME2	ENSG00000082212	protein_coding	2125.94	0.0844729	0.0496706	1.70066	0.0890066	0.153828
C5orf22	ENSG00000082213	protein_coding	1777.52	-0.247763	0.0506853	-4.88826	1.01729e-06	6.7547e-06
CCNT2	ENSG00000082258	protein_coding	2275.98	-0.015989	0.0446481	-0.358112	0.72026	0.798014
FAM135A	ENSG00000082269	protein_coding	1165.37	0.0450367	0.0708539	0.635627	0.52502	0.636039
COL19A1	ENSG00000082293	protein_coding	15.3812	1.1664	0.15962	7.30733	2.72497e-13	5.9966e-12
EPB41L3	ENSG00000082397	protein_coding	1399.18	0.435488	0.0924121	4.71245	2.44753e-06	1.49591e-05
COBLL1	ENSG00000082438	protein_coding	2206.23	0.229613	0.0733793	3.12912	0.00175332	0.00530315
DLG3	ENSG00000082458	protein_coding	3245.98	-0.211016	0.0474718	-4.44508	8.78592e-06	4.76526e-05
KCNK2	ENSG00000082482	protein_coding	34.0753	0.6898	0.19307	3.5728	0.000353178	0.00128967
SERTAD4	ENSG00000082497	protein_coding	976.002	0.101514	0.106654	0.951811	0.341193	0.457513
TRAF5	ENSG00000082512	protein_coding	1359.09	-0.0381786	0.0743596	-0.513432	0.607649	0.70725
MRPL22	ENSG00000082515	protein_coding	1045.57	-0.292661	0.052076	-5.61988	1.91087e-08	1.81986e-07
GEMIN5	ENSG00000082516	protein_coding	1356.91	-0.0160144	0.0440966	-0.363166	0.716481	0.795108
OPRK1	ENSG00000082556	protein_coding	67.0672	-0.255234	0.252697	-1.01004	0.312474	0.427237
NFE2L1	ENSG00000082641	protein_coding	13020.6	-0.0224907	0.0462957	-0.485804	0.627106	0.723309
SEMA5B	ENSG00000082684	protein_coding	143.847	-0.492341	0.120477	-4.08658	4.37776e-05	0.000202631
GSK3B	ENSG00000082701	protein_coding	3030.6	-0.0363289	0.0431766	-0.841402	0.400123	0.517393
ITGB5	ENSG00000082781	protein_coding	7706.04	0.177367	0.0636876	2.78495	0.00535354	0.0139936
ERC1	ENSG00000082805	protein_coding	2501.59	0.086418	0.0569564	1.51727	0.129199	0.209229
XPO1	ENSG00000082898	protein_coding	9099.84	-0.200415	0.0399814	-5.0127	5.36705e-07	3.78698e-06
LINC01587	ENSG00000082929	lncRNA	13.4134	-0.556159	0.189982	-2.92743	0.00341779	0.00945311
RNF13	ENSG00000082996	protein_coding	3348.03	0.0619238	0.0462566	1.3387	0.180668	0.275553
TRPM3	ENSG00000083067	protein_coding	15.8069	0.648229	0.138339	4.68581	2.78852e-06	1.68297e-05
PALB2	ENSG00000083093	protein_coding	785.693	-0.120019	0.0396269	-3.02871	0.00245597	0.00710566
DOP1A	ENSG00000083097	protein_coding	867.441	0.322501	0.0609825	5.28842	1.23376e-07	9.98246e-07
LYRM2	ENSG00000083099	protein_coding	1609.51	0.00798883	0.0435895	0.183274	0.854583	0.898479
BCKDHB	ENSG00000083123	protein_coding	796.213	0.0466254	0.0510341	0.913612	0.360921	0.47792
KAT6A	ENSG00000083168	protein_coding	3285.81	0.126213	0.0606198	2.08204	0.0373387	0.0743925
TUT7	ENSG00000083223	protein_coding	1549.24	0.0691456	0.0529969	1.30471	0.191991	0.289221
ULK2	ENSG00000083290	protein_coding	1080.66	0.180832	0.0557078	3.24607	0.00117008	0.00371968
GRHL2	ENSG00000083307	protein_coding	2761.24	-0.324	0.0601539	-5.38619	7.1968e-08	6.11157e-07
TNPO1	ENSG00000083312	protein_coding	5915.3	0.0162032	0.0519688	0.311787	0.755203	0.824861
PLOD1	ENSG00000083444	protein_coding	8731.28	-0.0551805	0.0609797	-0.904899	0.365519	0.482656
P2RX5	ENSG00000083454	protein_coding	121.044	0.234872	0.114707	2.04758	0.0406014	0.079869
ITGAE	ENSG00000083457	protein_coding	968.135	-0.127705	0.0621453	-2.05494	0.0398844	0.0786799
DIS3	ENSG00000083520	protein_coding	2232.33	-0.00171598	0.0421851	-0.0406774	0.967553	0.978249
PIBF1	ENSG00000083535	protein_coding	966.686	0.127116	0.0514895	2.46877	0.0135577	0.0312919
TDRD3	ENSG00000083544	protein_coding	788.806	0.268865	0.0488021	5.5093	3.60258e-08	3.25441e-07
AC000061.1	ENSG00000083622	lncRNA	2.46205	0.513752	0.257468	1.9954	0.0459991	0.0886763
NUFIP1	ENSG00000083635	protein_coding	408.582	-0.133038	0.042315	-3.14398	0.00166665	0.00506752
PDS5B	ENSG00000083642	protein_coding	1594.22	0.117092	0.0487355	2.4026	0.0162788	0.0366342
OXCT1	ENSG00000083720	protein_coding	1362	0.0224037	0.0953811	0.234886	0.814297	0.8693
RRAGB	ENSG00000083750	protein_coding	503.976	0.0854608	0.0419871	2.03541	0.0418099	0.0818045
EPYC	ENSG00000083782	protein_coding	64.1734	-0.16883	0.224376	-0.752444	0.451784	0.567686
CYLD	ENSG00000083799	protein_coding	2645.15	0.325305	0.0521847	6.23372	4.55493e-10	5.78908e-09
SLC27A5	ENSG00000083807	protein_coding	242.032	-0.52379	0.0772573	-6.77981	1.20331e-11	1.985e-10
ZNF324	ENSG00000083812	protein_coding	382.502	0.0166442	0.0406102	0.409853	0.681914	0.767594
ZNF671	ENSG00000083814	protein_coding	309.421	0.336838	0.0696915	4.83327	1.34311e-06	8.68275e-06
ZNF416	ENSG00000083817	protein_coding	234.964	0.0322726	0.0507842	0.635485	0.525112	0.636123
ZNF586	ENSG00000083828	protein_coding	389.927	0.0647447	0.0552748	1.17133	0.241468	0.348229
ZNF446	ENSG00000083838	protein_coding	380.642	-0.107823	0.0460812	-2.33984	0.0192918	0.0423741
ZNF264	ENSG00000083844	protein_coding	1578.29	0.250933	0.0548414	4.57562	4.74815e-06	2.73072e-05
RPS5	ENSG00000083845	protein_coding	28581.8	-0.275903	0.0817364	-3.37552	0.00073675	0.00246529
FAT1	ENSG00000083857	protein_coding	8670.31	-0.131913	0.0970424	-1.35933	0.174042	0.267436
YTHDC1	ENSG00000083896	protein_coding	3530.3	-0.0240161	0.0277305	-0.866054	0.386461	0.504069
CHMP2B	ENSG00000083937	protein_coding	2723	-0.11642	0.0472826	-2.46221	0.0138083	0.0317838
SMAP2	ENSG00000084070	protein_coding	3564.47	0.205026	0.052568	3.90021	9.61111e-05	0.00040814
PPIE	ENSG00000084072	protein_coding	2231.8	-0.166911	0.0424385	-3.93301	8.38888e-05	0.000361254
ZMPSTE24	ENSG00000084073	protein_coding	4175.69	-0.0978929	0.0441128	-2.21915	0.0264766	0.0554955
STARD7	ENSG00000084090	protein_coding	8033.66	-0.12551	0.0346406	-3.62321	0.000290975	0.00108473
NOA1	ENSG00000084092	protein_coding	1441.31	-0.127937	0.0429404	-2.9794	0.00288813	0.00816419
REST	ENSG00000084093	protein_coding	2173.22	0.0517647	0.0480966	1.07627	0.281808	0.393994
HAL	ENSG00000084110	protein_coding	548.737	-1.31236	0.161374	-8.13238	4.20944e-16	1.44831e-14
SSH1	ENSG00000084112	protein_coding	2960.03	0.0889904	0.0502402	1.7713	0.0765109	0.135872
GSTP1	ENSG00000084207	protein_coding	33948.3	-0.433331	0.0795026	-5.45052	5.02219e-08	4.40199e-07
APLP2	ENSG00000084234	protein_coding	53438.4	0.158479	0.063567	2.4931	0.0126632	0.0295164
FAM234B	ENSG00000084444	protein_coding	534.091	0.13053	0.0733576	1.77936	0.0751806	0.133915
SLCO1A2	ENSG00000084453	protein_coding	66.9625	0.0348	0.235119	0.14801	0.882335	0.918171
WBP11	ENSG00000084463	protein_coding	4250.57	-0.19821	0.0472278	-4.19689	2.70601e-05	0.000131352
EIF3I	ENSG00000084623	protein_coding	9545.27	-0.201355	0.0498348	-4.04045	5.33496e-05	0.000241648
NKAIN1	ENSG00000084628	protein_coding	39.9266	-0.529222	0.181115	-2.92202	0.00347773	0.00960357
COL16A1	ENSG00000084636	protein_coding	2595.93	0.409728	0.0837208	4.89398	9.88162e-07	6.58855e-06
TXLNA	ENSG00000084652	protein_coding	4934.84	-0.059388	0.0339081	-1.75144	0.0798707	0.140709
APOB	ENSG00000084674	protein_coding	37.6997	-0.384872	0.193985	-1.98403	0.0472525	0.0907135
NCOA1	ENSG00000084676	protein_coding	2645.36	0.11047	0.0512898	2.15385	0.0312521	0.0639438
AGBL5	ENSG00000084693	protein_coding	1654.6	-0.207713	0.0483445	-4.29651	1.73505e-05	8.79332e-05
EFR3B	ENSG00000084710	protein_coding	474.158	0.104346	0.121549	0.85847	0.390633	0.508139
KIF3C	ENSG00000084731	protein_coding	987.032	-0.353799	0.0995919	-3.55249	0.00038161	0.00138047
RAB10	ENSG00000084733	protein_coding	8893.58	-0.3274	0.0476425	-6.87202	6.32971e-12	1.08978e-10
GCKR	ENSG00000084734	protein_coding	55.0448	-0.57249	0.177751	-3.22074	0.00127861	0.00401493
HADHA	ENSG00000084754	protein_coding	9207.33	-0.0711243	0.0360655	-1.97209	0.0485995	0.0928757
MAPRE3	ENSG00000084764	protein_coding	943.382	0.0288236	0.0674491	0.427339	0.669133	0.757494
CAD	ENSG00000084774	protein_coding	3395.93	-0.33505	0.0617277	-5.42787	5.70294e-08	4.93481e-07
CD59	ENSG00000085063	protein_coding	19741	0.320465	0.0715422	4.47938	7.48603e-06	4.1148e-05
CD82	ENSG00000085117	protein_coding	3725.43	0.330228	0.0806879	4.09267	4.26441e-05	0.000197892
BCORL1	ENSG00000085185	protein_coding	1182.26	-0.0606025	0.0611893	-0.99041	0.321974	0.437397
ATRX	ENSG00000085224	protein_coding	4068.6	0.215115	0.057851	3.71844	0.000200455	0.000778187
AK6	ENSG00000085231	protein_coding	656.47	-0.143274	0.038649	-3.70706	0.000209675	0.000809642
FCN1	ENSG00000085265	protein_coding	633.683	0.718417	0.116798	6.15095	7.70189e-10	9.43465e-09
MYNN	ENSG00000085274	protein_coding	936.211	-0.140698	0.0487343	-2.88703	0.00388893	0.010582
MECOM	ENSG00000085276	protein_coding	3509.13	0.206767	0.104201	1.98432	0.0472204	0.0906597
SCAMP1	ENSG00000085365	protein_coding	2686.82	0.0328416	0.0524542	0.6261	0.531249	0.641614
PREP	ENSG00000085377	protein_coding	1721.7	0.087457	0.042246	2.07018	0.0384352	0.0762059
HACE1	ENSG00000085382	protein_coding	508.437	0.147274	0.0569801	2.58465	0.00974773	0.0235554
SEH1L	ENSG00000085415	protein_coding	2147.99	-0.182527	0.0512802	-3.55941	0.000371693	0.00134876
WDR47	ENSG00000085433	protein_coding	690.753	0.239798	0.0436237	5.49698	3.86352e-08	3.47204e-07
WDFY1	ENSG00000085449	protein_coding	3009.63	0.0656086	0.0449905	1.45828	0.144764	0.229976
OVGP1	ENSG00000085465	protein_coding	232.462	0.0335366	0.103829	0.322999	0.746696	0.818601
SLC25A24	ENSG00000085491	protein_coding	2385.62	0.0787701	0.0612318	1.28642	0.198295	0.296646
MAP3K4	ENSG00000085511	protein_coding	1076.39	0.178709	0.0424477	4.21009	2.55266e-05	0.000124621
PILRA	ENSG00000085514	protein_coding	537.354	0.490606	0.0838244	5.85279	4.83404e-09	5.11884e-08
IGSF9	ENSG00000085552	protein_coding	1399.94	-0.297773	0.103224	-2.88473	0.00391744	0.0106482
ABCB1	ENSG00000085563	protein_coding	184.122	0.507297	0.101192	5.01321	5.35301e-07	3.77769e-06
ZNF213	ENSG00000085644	protein_coding	1137.64	-0.0592577	0.0542486	-1.09234	0.274685	0.386039
AKR1B1	ENSG00000085662	protein_coding	4711.94	-0.324049	0.108976	-2.97358	0.00294343	0.00830159
CPNE3	ENSG00000085719	protein_coding	6529.45	-0.0297933	0.0527747	-0.564536	0.572389	0.677114
RRN3	ENSG00000085721	protein_coding	2340.55	-0.0631102	0.0391451	-1.61221	0.106916	0.178958
CTTN	ENSG00000085733	protein_coding	15018.4	-0.244053	0.0503978	-4.84254	1.28193e-06	8.32696e-06
WNT11	ENSG00000085741	protein_coding	116.935	0.414097	0.133726	3.09662	0.00195743	0.00584062
MTIF2	ENSG00000085760	protein_coding	1769.7	-0.239422	0.038155	-6.27497	3.49707e-10	4.52552e-09
DDHD2	ENSG00000085788	protein_coding	1988.06	-0.0651059	0.0641808	-1.01441	0.310385	0.424983
TTC39A	ENSG00000085831	protein_coding	2206.2	-0.342115	0.0907457	-3.77004	0.000163222	0.000649413
EPS15	ENSG00000085832	protein_coding	3694.28	0.152269	0.0368451	4.13268	3.58554e-05	0.000169862
ORC1	ENSG00000085840	protein_coding	364.698	-0.749594	0.0950685	-7.88478	3.15088e-15	9.56563e-14
MGST2	ENSG00000085871	protein_coding	1686.81	-0.0624984	0.0568326	-1.09969	0.271466	0.38243
CHERP	ENSG00000085872	protein_coding	2077.02	-0.140109	0.0479647	-2.92109	0.00348804	0.00962899
ATG16L1	ENSG00000085978	protein_coding	1917.68	-0.184522	0.0379487	-4.8624	1.15969e-06	7.60241e-06
USP40	ENSG00000085982	protein_coding	2803.72	-0.120926	0.0463529	-2.60881	0.0090858	0.0221534
POMGNT1	ENSG00000085998	protein_coding	3822.08	-0.114109	0.0463713	-2.46076	0.0138642	0.0318956
RAD54L	ENSG00000085999	protein_coding	309.813	-0.814287	0.0967544	-8.41602	3.89501e-17	1.57222e-15
MAST2	ENSG00000086015	protein_coding	2944.16	-0.317033	0.0528807	-5.99525	2.03175e-09	2.30759e-08
DNAJA1	ENSG00000086061	protein_coding	8984.47	-0.221578	0.0471388	-4.70055	2.59458e-06	1.5769e-05
B4GALT1	ENSG00000086062	protein_coding	15460.4	-0.423412	0.0592682	-7.144	9.06507e-13	1.81855e-11
CHMP5	ENSG00000086065	protein_coding	4660.51	-0.215596	0.0525092	-4.10587	4.02788e-05	0.000188347
NFX1	ENSG00000086102	protein_coding	2590.35	-0.11699	0.0401856	-2.91125	0.00359991	0.00988117
AQP6	ENSG00000086159	protein_coding	44.9755	-0.639849	0.184659	-3.46502	0.000530194	0.00184352
DIMT1	ENSG00000086189	protein_coding	1456.41	0.0143267	0.0418076	0.342682	0.731838	0.806944
IPO11	ENSG00000086200	protein_coding	1136.31	0.124081	0.04874	2.54577	0.0109037	0.0259438
FOLH1	ENSG00000086205	protein_coding	156.215	-0.17491	0.107252	-1.63084	0.102925	0.173449
EIF2AK1	ENSG00000086232	protein_coding	11818	-0.298157	0.0433533	-6.87738	6.09621e-12	1.0525e-10
NME8	ENSG00000086288	protein_coding	23.475	0.194607	0.103703	1.87659	0.0605748	0.111689
EPDR1	ENSG00000086289	protein_coding	2837.02	0.414448	0.101718	4.07448	4.61174e-05	0.000212418
SNX10	ENSG00000086300	protein_coding	1553.83	-0.0190402	0.0865765	-0.219923	0.825931	0.877363
SEPHS1	ENSG00000086475	protein_coding	2443.52	-0.265182	0.0398791	-6.64965	2.93793e-11	4.54388e-10
MRPL28	ENSG00000086504	protein_coding	2501.13	-0.225826	0.0571452	-3.9518	7.75659e-05	0.000337411
HBQ1	ENSG00000086506	protein_coding	5.62686	-0.804567	0.223958	-3.59248	0.00032754	0.00120601
ITPKC	ENSG00000086544	protein_coding	3208.4	-0.0941074	0.0690754	-1.36239	0.173076	0.266201
CEACAM6	ENSG00000086548	protein_coding	84119.1	0.132404	0.133272	0.99349	0.320471	0.435903
FAT2	ENSG00000086570	protein_coding	290.175	0.535606	0.190638	2.80955	0.00496109	0.0130903
RBM22	ENSG00000086589	protein_coding	2190.16	0.0167324	0.0302553	0.553041	0.580235	0.683988
TMED2	ENSG00000086598	protein_coding	19339.1	-0.458238	0.0517939	-8.84734	8.96286e-19	4.48681e-17
ERO1B	ENSG00000086619	protein_coding	1409.33	-0.325058	0.121403	-2.67752	0.00741702	0.0185949
ZFAND6	ENSG00000086666	protein_coding	3657.53	-0.0448277	0.0442581	-1.01287	0.311122	0.425791
HSD17B2	ENSG00000086696	protein_coding	272.474	0.242893	0.20322	1.19522	0.232	0.3372
TXLNG	ENSG00000086712	protein_coding	1249.81	0.00277887	0.0452591	0.0613991	0.951041	0.967026
PPEF1	ENSG00000086717	protein_coding	53.9404	-0.425895	0.122702	-3.47098	0.000518567	0.00180729
LAT2	ENSG00000086730	protein_coding	957.334	0.253511	0.0773524	3.27735	0.00104785	0.00337669
HUWE1	ENSG00000086758	protein_coding	14441.5	-0.124796	0.0516452	-2.4164	0.0156746	0.0354382
ZW10	ENSG00000086827	protein_coding	971.054	-0.11279	0.0427693	-2.63718	0.00835992	0.0206248
ALG9	ENSG00000086848	protein_coding	493.865	-0.451824	0.0692707	-6.52258	6.9109e-11	1.00649e-09
MYBPC2	ENSG00000086967	protein_coding	82.9242	0.52309	0.13515	3.87043	0.000108645	0.000454632
NOX4	ENSG00000086991	protein_coding	262.55	0.17544	0.0994963	1.76328	0.077853	0.137854
ACOX3	ENSG00000087008	protein_coding	951.6	-0.101684	0.0499994	-2.03369	0.0419824	0.0820969
MTMR2	ENSG00000087053	protein_coding	1985.91	-0.112755	0.0514524	-2.19144	0.0284202	0.0589424
PPP1R15A	ENSG00000087074	protein_coding	3983.53	0.336039	0.0655531	5.12621	2.95632e-07	2.20286e-06
HSD17B14	ENSG00000087076	protein_coding	630.451	-0.284579	0.103832	-2.74077	0.00612955	0.0157871
TRIP6	ENSG00000087077	protein_coding	3782.97	-0.159078	0.080145	-1.98488	0.0471577	0.0905627
ACHE	ENSG00000087085	protein_coding	870.553	-0.741758	0.154203	-4.81027	1.5073e-06	9.62223e-06
FTL	ENSG00000087086	protein_coding	210782	-0.0231635	0.0839335	-0.275974	0.782568	0.845748
SRRT	ENSG00000087087	protein_coding	4723.65	-0.355499	0.0428339	-8.29947	1.04575e-16	3.96981e-15
BAX	ENSG00000087088	protein_coding	2630.67	-0.141826	0.0518578	-2.73491	0.00623981	0.0160263
NLK	ENSG00000087095	protein_coding	1331.37	-0.139138	0.0399787	-3.48031	0.000500837	0.00175226
PIGS	ENSG00000087111	protein_coding	3424.09	-0.000269631	0.0483839	-0.00557275	0.995554	0.996956
ADAMTS2	ENSG00000087116	protein_coding	1807.99	0.318626	0.0968408	3.29021	0.00100114	0.00324763
TMPRSS11E	ENSG00000087128	protein_coding	680.988	-0.596913	0.210086	-2.84128	0.00449327	0.0120183
ATXN7L3	ENSG00000087152	protein_coding	3886.29	-0.230326	0.0393984	-5.84606	5.03348e-09	5.31834e-08
PGS1	ENSG00000087157	protein_coding	1742.22	-0.00731187	0.0450959	-0.16214	0.871195	0.910161
PSMC5	ENSG00000087191	protein_coding	6034.33	-0.249964	0.043097	-5.80004	6.62981e-09	6.85792e-08
UIMC1	ENSG00000087206	protein_coding	995.115	-0.0185558	0.0356658	-0.520268	0.602877	0.703449
CETP	ENSG00000087237	protein_coding	81.5923	0.522744	0.0703287	7.43287	1.06267e-13	2.5092e-12
MMP2	ENSG00000087245	protein_coding	17154.3	0.555366	0.0938325	5.91869	3.24511e-09	3.55168e-08
MT3	ENSG00000087250	protein_coding	22.1217	-0.172795	0.184667	-0.935711	0.349422	0.465939
LPCAT2	ENSG00000087253	protein_coding	1353.81	0.31677	0.0715547	4.42697	9.55663e-06	5.14465e-05
GNAO1	ENSG00000087258	protein_coding	230.88	0.559245	0.110986	5.03887	4.68289e-07	3.34607e-06
OGFOD1	ENSG00000087263	protein_coding	1892.5	-0.065147	0.0356033	-1.8298	0.0672797	0.121936
SH3BP2	ENSG00000087266	protein_coding	2728.45	-0.115309	0.0530871	-2.17207	0.0298505	0.0614735
NOP14	ENSG00000087269	protein_coding	2348.28	-0.199018	0.0427142	-4.65929	3.17301e-06	1.89445e-05
ADD1	ENSG00000087274	protein_coding	9743.31	0.138687	0.0323285	4.28994	1.78719e-05	9.03221e-05
L2HGDH	ENSG00000087299	protein_coding	541.186	-0.358584	0.0561626	-6.38475	1.71677e-10	2.33016e-09
TXNDC16	ENSG00000087301	protein_coding	586.925	-0.0436736	0.0712731	-0.612764	0.540032	0.649255
RTRAF	ENSG00000087302	protein_coding	5140.42	-0.287409	0.0439435	-6.54041	6.13485e-11	9.01247e-10
NID2	ENSG00000087303	protein_coding	714.968	0.220543	0.102273	2.15642	0.0310507	0.0635767
GMCL1	ENSG00000087338	protein_coding	1887.35	-0.180648	0.0410472	-4.40099	1.07757e-05	5.7368e-05
SF3B2	ENSG00000087365	protein_coding	11784.5	-0.211464	0.0368634	-5.73641	9.67026e-09	9.73131e-08
KLHL42	ENSG00000087448	protein_coding	1352.28	-0.0120846	0.0578683	-0.20883	0.834581	0.88378
GNAS	ENSG00000087460	protein_coding	53278	-0.288218	0.056545	-5.09714	3.44824e-07	2.52984e-06
DNM1L	ENSG00000087470	protein_coding	3209.86	-0.224574	0.0534173	-4.20415	2.6206e-05	0.000127564
PTHLH	ENSG00000087494	protein_coding	347.101	-0.410091	0.164812	-2.48824	0.0128377	0.0298621
PHACTR3	ENSG00000087495	protein_coding	773.092	0.310002	0.184696	1.67844	0.0932611	0.15983
ERGIC2	ENSG00000087502	protein_coding	2946.81	-0.304596	0.0535694	-5.68602	1.30038e-08	1.27832e-07
TFAP2C	ENSG00000087510	protein_coding	1031.7	-0.343598	0.0885935	-3.87836	0.000105162	0.000441676
AURKA	ENSG00000087586	protein_coding	1177.36	-0.930319	0.0939671	-9.90047	4.14306e-23	3.43422e-21
CASS4	ENSG00000087589	protein_coding	379.26	1.16052	0.0743597	15.6068	6.54272e-55	4.11072e-52
PIR	ENSG00000087842	protein_coding	996.789	-0.670077	0.111011	-6.03614	1.57842e-09	1.83452e-08
AAMDC	ENSG00000087884	protein_coding	545.922	-0.0639943	0.0546782	-1.17038	0.241848	0.34864
RFX2	ENSG00000087903	protein_coding	684.052	0.470884	0.077052	6.11125	9.88515e-10	1.19006e-08
METTL2A	ENSG00000087995	protein_coding	1002.71	-0.295129	0.0443322	-6.65722	2.79047e-11	4.33593e-10
SULT2B1	ENSG00000088002	protein_coding	622.889	-0.760525	0.126602	-6.0072	1.8875e-09	2.16016e-08
ALG6	ENSG00000088035	protein_coding	775.572	-0.202044	0.0441219	-4.57923	4.66686e-06	2.68861e-05
CNOT3	ENSG00000088038	protein_coding	2405.86	-0.258257	0.0466168	-5.53999	3.0249e-08	2.77242e-07
GP6	ENSG00000088053	protein_coding	16.0487	0.327931	0.138562	2.36667	0.0179488	0.0398707
PTPN4	ENSG00000088179	protein_coding	1198.51	0.231697	0.0634457	3.6519	0.00026031	0.000981058
DDX18	ENSG00000088205	protein_coding	4583.93	-0.152915	0.0388297	-3.9381	8.21299e-05	0.000354772
KHSRP	ENSG00000088247	protein_coding	7362.46	-0.151909	0.0454464	-3.34259	0.000830001	0.00274443
GNA11	ENSG00000088256	protein_coding	3364.69	0.0573709	0.0461901	1.24206	0.214215	0.31585
ASAP3	ENSG00000088280	protein_coding	1511.06	0.0783838	0.0757311	1.03503	0.300656	0.414754
EDEM2	ENSG00000088298	protein_coding	2771.23	-0.139755	0.0495533	-2.82029	0.00479802	0.0127142
DNMT3B	ENSG00000088305	protein_coding	350.991	-0.698127	0.103964	-6.71511	1.87928e-11	3.00076e-10
REM1	ENSG00000088320	protein_coding	58.2692	1.00461	0.0753655	13.3299	1.55202e-40	4.70513e-38
TPX2	ENSG00000088325	protein_coding	2819.3	-0.766227	0.10876	-7.04515	1.85268e-12	3.50272e-11
FER1L4	ENSG00000088340	transcribed_unitary_pseudogene	982.012	-0.760926	0.133274	-5.7095	1.13309e-08	1.12613e-07
PDRG1	ENSG00000088356	protein_coding	1032.6	-0.4192	0.0564526	-7.4257	1.12184e-13	2.63172e-12
EPB41L1	ENSG00000088367	protein_coding	3379.33	0.117544	0.0605658	1.94076	0.0522868	0.0986568
SLC15A1	ENSG00000088386	protein_coding	205.218	-0.778173	0.204946	-3.79697	0.000146477	0.000590984
DOCK9	ENSG00000088387	protein_coding	4473.35	0.311937	0.0703485	4.43417	9.24269e-06	4.9868e-05
ANKRD10	ENSG00000088448	protein_coding	4067.15	0.0090426	0.0629659	0.143611	0.885808	0.920911
TGDS	ENSG00000088451	protein_coding	687.017	-0.122462	0.0527821	-2.32014	0.0203333	0.0443539
DOCK3	ENSG00000088538	protein_coding	221.915	0.00812879	0.130849	0.0621235	0.950465	0.966585
C3orf18	ENSG00000088543	protein_coding	334.478	0.141064	0.061584	2.29059	0.0219869	0.0474099
COQ9	ENSG00000088682	protein_coding	2396.65	-0.351936	0.0482942	-7.28735	3.16114e-13	6.85552e-12
TMEM40	ENSG00000088726	protein_coding	102.601	-0.0654586	0.151725	-0.43143	0.666155	0.75513
KIF9	ENSG00000088727	protein_coding	341.322	0.0974493	0.0575318	1.69383	0.090297	0.155692
ARHGAP28	ENSG00000088756	protein_coding	328.273	0.653576	0.0924915	7.06633	1.59081e-12	3.04212e-11
CRLS1	ENSG00000088766	protein_coding	3740.33	0.0410702	0.0678511	0.6053	0.54498	0.653337
DEFB127	ENSG00000088782	protein_coding	0.0522817	0.125842	1.42193	0.0885005	0.929479
PPP1R13B	ENSG00000088808	protein_coding	2707.17	-0.0578294	0.0700192	-0.825908	0.408856	0.526019
ATRN	ENSG00000088812	protein_coding	3748.42	0.0910499	0.0513641	1.77263	0.0762892	0.135539
SMOX	ENSG00000088826	protein_coding	730.747	-0.629769	0.100054	-6.29428	3.08838e-10	4.02791e-09
SIGLEC1	ENSG00000088827	protein_coding	1576.49	0.830901	0.100222	8.2906	1.12677e-16	4.25873e-15
FKBP1A	ENSG00000088832	protein_coding	9576.74	-0.0151807	0.040211	-0.377526	0.705783	0.786633
NSFL1C	ENSG00000088833	protein_coding	3736.97	-0.121616	0.0416407	-2.92062	0.00349341	0.00963951
SLC4A11	ENSG00000088836	protein_coding	588.004	-0.398194	0.134015	-2.97125	0.00296587	0.00835401
C20orf194	ENSG00000088854	protein_coding	1083.31	0.533079	0.0536515	9.93594	2.90414e-23	2.45899e-21
ZNF343	ENSG00000088876	protein_coding	403.074	-0.0621672	0.0452145	-1.37494	0.16915	0.261249
EBF4	ENSG00000088881	protein_coding	633.462	0.208768	0.0944311	2.2108	0.0270498	0.0565371
CPXM1	ENSG00000088882	protein_coding	751.088	0.672253	0.111292	6.04043	1.53706e-09	1.79077e-08
MAVS	ENSG00000088888	protein_coding	5037.94	-0.0271633	0.0471525	-0.576073	0.564566	0.6707
LZTS3	ENSG00000088899	protein_coding	2662.09	-0.304075	0.0800151	-3.80022	0.00014457	0.000584156
F11	ENSG00000088926	protein_coding	64.0818	1.73238	0.203866	8.49764	1.93488e-17	8.17553e-16
XRN2	ENSG00000088930	protein_coding	4982.64	-0.0163754	0.0444803	-0.36815	0.712761	0.792075
KIZ	ENSG00000088970	protein_coding	598.762	0.130303	0.0473425	2.75234	0.00591706	0.0153108
DYNLL1	ENSG00000088986	protein_coding	6703.16	-0.32685	0.0466203	-7.01089	2.36808e-12	4.39097e-11
TESC	ENSG00000088992	protein_coding	4106.12	-0.85587	0.176847	-4.83962	1.30088e-06	8.44121e-06
SNX5	ENSG00000089006	protein_coding	5040.01	-0.0890294	0.0410786	-2.16729	0.0302125	0.0621099
RPL6	ENSG00000089009	protein_coding	24722.8	-0.281369	0.0520796	-5.40267	6.56556e-08	5.61622e-07
SIRPG	ENSG00000089012	protein_coding	186.093	0.0508461	0.10433	0.48736	0.626003	0.722402
MAPKAPK5	ENSG00000089022	protein_coding	1811.77	-0.278962	0.0347078	-8.03745	9.17289e-16	3.01032e-14
P2RX7	ENSG00000089041	protein_coding	498.285	0.455223	0.0889835	5.11581	3.12397e-07	2.3115e-06
ESF1	ENSG00000089048	protein_coding	933.385	-0.164113	0.051683	-3.17538	0.00149641	0.00460939
RBBP9	ENSG00000089050	protein_coding	1615.78	0.140804	0.0530598	2.65368	0.00796203	0.0197805
ANAPC5	ENSG00000089053	protein_coding	5565.81	-0.269437	0.0368457	-7.31258	2.6207e-13	5.78476e-12
SLC23A2	ENSG00000089057	protein_coding	1800.95	-0.0763113	0.0607691	-1.25576	0.209203	0.309895
SLC8B1	ENSG00000089060	protein_coding	2345.54	-0.211358	0.04871	-4.3391	1.43065e-05	7.402e-05
TMEM230	ENSG00000089063	protein_coding	5154.23	-0.155774	0.0466857	-3.33665	0.000847956	0.00279782
DZANK1	ENSG00000089091	protein_coding	244.71	0.137736	0.0611595	2.25208	0.0243174	0.0516036
KDM2B	ENSG00000089094	protein_coding	1456.21	-0.0535804	0.0397895	-1.3466	0.17811	0.27238
CFAP61	ENSG00000089101	protein_coding	72.8634	1.53972	0.145387	10.5905	3.29891e-26	3.7052e-24
LHX5	ENSG00000089116	protein_coding	21.0346	-0.990468	0.25343	-3.90826	9.2965e-05	0.000395896
TASP1	ENSG00000089123	protein_coding	528.458	0.0246346	0.0454967	0.541459	0.588191	0.690831
OAS1	ENSG00000089127	protein_coding	4584.26	-0.471467	0.0968013	-4.87046	1.11338e-06	7.32428e-06
GCN1	ENSG00000089154	protein_coding	7153.85	-0.335555	0.0479085	-7.00407	2.48628e-12	4.59247e-11
RPLP0	ENSG00000089157	protein_coding	65050.9	-0.493542	0.0679091	-7.26769	3.65687e-13	7.83651e-12
PXN	ENSG00000089159	protein_coding	6177.88	-0.0292124	0.0601927	-0.485314	0.627454	0.723556
SIRT4	ENSG00000089163	protein_coding	68.1672	-0.179029	0.0661164	-2.70779	0.00677328	0.0172008
RPH3A	ENSG00000089169	protein_coding	10.2396	0.538456	0.143021	3.76488	0.000166632	0.000661582
KIF16B	ENSG00000089177	protein_coding	1452.27	0.164337	0.0565078	2.90822	0.00363496	0.00996538
TRMT6	ENSG00000089195	protein_coding	1160.53	-0.265389	0.0520183	-5.10185	3.36357e-07	2.47274e-06
CHGB	ENSG00000089199	protein_coding	595.891	-1.32051	0.241441	-5.4693	4.5181e-08	3.99671e-07
PEBP1	ENSG00000089220	protein_coding	10928.8	-0.0746475	0.0561446	-1.32956	0.183664	0.279101
TBX5	ENSG00000089225	protein_coding	410.755	1.0514	0.075901	13.8522	1.23321e-43	4.45519e-41
BRAP	ENSG00000089234	protein_coding	1316.51	-0.234312	0.0317996	-7.36841	1.72681e-13	3.91121e-12
ERP29	ENSG00000089248	protein_coding	10541.3	-0.356465	0.0622855	-5.72308	1.04609e-08	1.04734e-07
NOS1	ENSG00000089250	protein_coding	89.8523	0.0882982	0.195024	0.452756	0.650724	0.74212
FUS	ENSG00000089280	protein_coding	13207.7	-0.163304	0.0405707	-4.02518	5.69328e-05	0.000256245
IGBP1	ENSG00000089289	protein_coding	3259.18	-0.0466663	0.0492176	-0.948163	0.343046	0.459444
FXYD5	ENSG00000089327	protein_coding	5202.82	0.0604618	0.0875402	0.690675	0.48977	0.603454
ZNF302	ENSG00000089335	protein_coding	1149.14	0.0286008	0.0523869	0.545954	0.585098	0.68813
GRAMD1A	ENSG00000089351	protein_coding	6551.76	-0.295921	0.0691829	-4.27737	1.89111e-05	9.50312e-05
FXYD3	ENSG00000089356	protein_coding	6156.78	-0.411859	0.139065	-2.96163	0.00306016	0.0085861
HEPH	ENSG00000089472	protein_coding	948.919	0.318274	0.0978532	3.25256	0.0011437	0.00364679
CDIP1	ENSG00000089486	protein_coding	1447.16	0.232959	0.0645889	3.60679	0.000310003	0.00114777
CMTM1	ENSG00000089505	protein_coding	61.543	0.0572092	0.0711801	0.803725	0.421556	0.538518
KCNH4	ENSG00000089558	protein_coding	18.9664	0.0403401	0.109856	0.367208	0.713464	0.792673
GANAB	ENSG00000089597	protein_coding	22780.4	-0.203512	0.0447572	-4.54702	5.44119e-06	3.09116e-05
GMIP	ENSG00000089639	protein_coding	1521.59	0.173029	0.0467388	3.70204	0.00021387	0.000823931
RBM41	ENSG00000089682	protein_coding	600.716	0.00162955	0.0519891	0.031344	0.974995	0.983297
BIRC5	ENSG00000089685	protein_coding	2026.15	-0.766085	0.109486	-6.99713	2.61259e-12	4.81347e-11
LAG3	ENSG00000089692	protein_coding	425.832	-0.394208	0.115863	-3.40237	0.000668043	0.00226223
MLF2	ENSG00000089693	protein_coding	8968.56	-0.356382	0.0570048	-6.25178	4.0579e-10	5.19545e-09
OTUB2	ENSG00000089723	protein_coding	200.22	-0.339454	0.0756339	-4.48812	7.18533e-06	3.96611e-05
DDX24	ENSG00000089737	protein_coding	6791.05	0.0611735	0.0375228	1.6303	0.103037	0.173573
ZBTB25	ENSG00000089775	protein_coding	865.631	-0.0115139	0.0555906	-0.20712	0.835916	0.884739
NECAP1	ENSG00000089818	protein_coding	2109.68	-0.189451	0.0434518	-4.36003	1.30046e-05	6.79168e-05
ARHGAP4	ENSG00000089820	protein_coding	2247.88	-0.117352	0.0825845	-1.421	0.155318	0.243547
ANKRD24	ENSG00000089847	protein_coding	113.77	-0.105662	0.114706	-0.921157	0.356969	0.473772
DHX32	ENSG00000089876	protein_coding	2370.48	-0.144656	0.0570082	-2.53747	0.0111658	0.0264845
RCOR1	ENSG00000089902	protein_coding	2445.05	-0.0585965	0.0521444	-1.12374	0.261125	0.37078
GPATCH2L	ENSG00000089916	protein_coding	1683.88	0.102689	0.059204	1.73449	0.0828315	0.145017
LTBP4	ENSG00000090006	protein_coding	4686.95	0.788662	0.0802053	9.83303	8.11382e-23	6.56251e-21
BLVRB	ENSG00000090013	protein_coding	4218.3	-0.377698	0.0893593	-4.22674	2.37102e-05	0.00011658
SLC9A1	ENSG00000090020	protein_coding	3426.88	0.112646	0.070543	1.59684	0.110302	0.183618
SPTLC1	ENSG00000090054	protein_coding	2551.09	-0.0466491	0.0427288	-1.09175	0.274944	0.386315
PAPOLA	ENSG00000090060	protein_coding	9750.23	-0.274112	0.0440625	-6.22097	4.9409e-10	6.23985e-09
CCNK	ENSG00000090061	protein_coding	572.284	-0.108927	0.0485741	-2.2425	0.0249291	0.052744
PCBP4	ENSG00000090097	protein_coding	1273.46	-0.248702	0.0602544	-4.12753	3.66676e-05	0.000173255
RGS1	ENSG00000090104	protein_coding	5025.48	0.379453	0.108583	3.49459	0.000474799	0.00167169
YPEL3	ENSG00000090238	protein_coding	3075.78	-0.0740864	0.0670327	-1.10523	0.269061	0.379722
MRPS33	ENSG00000090263	protein_coding	1702.72	-0.396708	0.0579407	-6.84679	7.55281e-12	1.28102e-10
NDUFB2	ENSG00000090266	protein_coding	3334.22	-0.268197	0.0553815	-4.84272	1.28077e-06	8.32066e-06
NUDC	ENSG00000090273	protein_coding	5490.82	-0.100037	0.0503323	-1.98753	0.0468632	0.0900938
MAEA	ENSG00000090316	protein_coding	2964.85	-0.219871	0.0384448	-5.71915	1.0706e-08	1.06917e-07
ICAM1	ENSG00000090339	protein_coding	15840.7	0.142	0.100122	1.41828	0.15611	0.244524
STRN4	ENSG00000090372	protein_coding	4193.93	-0.233391	0.0487796	-4.7846	1.71328e-06	1.08114e-05
IRAK3	ENSG00000090376	protein_coding	1648.59	0.21593	0.110999	1.94533	0.0517351	0.097803
LYZ	ENSG00000090382	protein_coding	24367.6	0.779111	0.125042	6.2308	4.64061e-10	5.8859e-09
SI	ENSG00000090402	protein_coding	1.26113	0.0702407	0.481851	0.145773	0.884101	0.919523
MUL1	ENSG00000090432	protein_coding	1780.98	0.106888	0.0446078	2.39616	0.0165677	0.0371915
TFAP4	ENSG00000090447	protein_coding	749.141	-0.25327	0.0504349	-5.02172	5.12121e-07	3.63066e-06
PDCD7	ENSG00000090470	protein_coding	941.003	-0.0498733	0.0295519	-1.68765	0.0914784	0.157309
SPG21	ENSG00000090487	protein_coding	4860.25	-0.0832576	0.035565	-2.341	0.0192322	0.0422626
FETUB	ENSG00000090512	protein_coding	4.1194	-0.220075	0.2369	-0.928976	0.352902	0.469539
DNAJB11	ENSG00000090520	protein_coding	4120.74	-0.380003	0.0452218	-8.40309	4.34898e-17	1.73767e-15
P3H2	ENSG00000090530	protein_coding	1546.97	0.911749	0.136255	6.69148	2.2092e-11	3.49155e-10
THPO	ENSG00000090534	protein_coding	120.853	-1.3037	0.170817	-7.63213	2.30911e-14	6.01951e-13
CHRD	ENSG00000090539	protein_coding	672.895	-0.681629	0.127126	-5.36184	8.23771e-08	6.89956e-07
FLT3LG	ENSG00000090554	protein_coding	92.2665	0.156786	0.0692641	2.2636	0.0235989	0.0503078
RAB11FIP3	ENSG00000090565	protein_coding	2164.16	0.0828555	0.0596177	1.38978	0.164596	0.255462
GNPTG	ENSG00000090581	protein_coding	3477.55	0.00293317	0.0552798	0.0530604	0.957684	0.971647
ZNF268	ENSG00000090612	protein_coding	1084.89	-0.00640536	0.0481814	-0.132943	0.894239	0.92651
GOLGA3	ENSG00000090615	protein_coding	6294.24	-0.214883	0.0491401	-4.37287	1.22621e-05	6.44037e-05
PABPC4	ENSG00000090621	protein_coding	8606.24	-0.173825	0.0442242	-3.93053	8.47597e-05	0.000364606
CD209	ENSG00000090659	protein_coding	480.207	0.71664	0.107942	6.63915	3.15502e-11	4.85194e-10
CERS4	ENSG00000090661	protein_coding	2152.82	-0.164046	0.0994517	-1.64951	0.099044	0.168093
MCOLN1	ENSG00000090674	protein_coding	1223.85	0.246553	0.0518791	4.75246	2.0096e-06	1.24921e-05
USP48	ENSG00000090686	protein_coding	2888.03	0.0672997	0.0380374	1.7693	0.0768433	0.136361
EFNB1	ENSG00000090776	protein_coding	1569.61	0.404574	0.0930248	4.3491	1.36698e-05	7.10483e-05
PDPR	ENSG00000090857	protein_coding	2139.81	0.255167	0.0548899	4.6487	3.34041e-06	1.98348e-05
AARS1	ENSG00000090861	protein_coding	8183.1	-0.215146	0.0524875	-4.09899	4.14952e-05	0.000193368
GLG1	ENSG00000090863	protein_coding	10775.6	0.0375174	0.0433798	0.864857	0.387117	0.504777
KIF4A	ENSG00000090889	protein_coding	980.434	-0.783795	0.103454	-7.57629	3.55587e-14	9.00959e-13
TNRC6A	ENSG00000090905	protein_coding	2648.24	0.0763548	0.0497036	1.5362	0.124489	0.202919
PLEKHG2	ENSG00000090924	protein_coding	3150.56	-0.397619	0.0918981	-4.32673	1.51338e-05	7.79258e-05
DLL3	ENSG00000090932	protein_coding	194.08	-1.95941	0.228656	-8.56925	1.04162e-17	4.58441e-16
NAT14	ENSG00000090971	protein_coding	887.824	-0.223786	0.0727166	-3.07751	0.00208735	0.00616464
PITPNM2	ENSG00000090975	protein_coding	1176.75	-0.207263	0.0709844	-2.91984	0.00350207	0.00965814
EXOC1	ENSG00000090989	protein_coding	2160.29	-0.0949846	0.0380119	-2.49881	0.012461	0.02911
RBM27	ENSG00000091009	protein_coding	1252.67	-0.0104314	0.0390225	-0.267318	0.789224	0.850767
POU4F3	ENSG00000091010	protein_coding	3.64902	0.0688301	0.160716	0.42827	0.668454	0.756993
OSBPL8	ENSG00000091039	protein_coding	3591.44	0.151479	0.0581384	2.60549	0.00917429	0.022339
DTX2	ENSG00000091073	protein_coding	2072.83	-0.307417	0.0733258	-4.19248	2.75925e-05	0.0001337
NLRC4	ENSG00000091106	protein_coding	210.864	0.597788	0.0763459	7.82999	4.87901e-15	1.42819e-13
PUS7	ENSG00000091127	protein_coding	1126.78	-0.447172	0.0570792	-7.83424	4.71696e-15	1.39014e-13
LAMB4	ENSG00000091128	protein_coding	13.6654	0.547341	0.11343	4.82534	1.39763e-06	9.0043e-06
NRCAM	ENSG00000091129	protein_coding	446.721	0.0766137	0.144704	0.529451	0.596492	0.697908
LAMB1	ENSG00000091136	protein_coding	7291.49	0.379895	0.0761455	4.98907	6.06711e-07	4.24159e-06
SLC26A4	ENSG00000091137	protein_coding	308.676	-1.42576	0.185488	-7.68653	1.51174e-14	4.04548e-13
SLC26A3	ENSG00000091138	protein_coding	3.23825	0.662378	0.190218	3.48221	0.000497295	0.00174156
DLD	ENSG00000091140	protein_coding	3413.86	-0.231641	0.0470524	-4.92305	8.52053e-07	5.76619e-06
WDR7	ENSG00000091157	protein_coding	1052.61	0.250326	0.0488223	5.1273	2.93927e-07	2.19166e-06
TXNL1	ENSG00000091164	protein_coding	3065.72	-0.232335	0.0512627	-4.53225	5.83598e-06	3.28915e-05
IL5RA	ENSG00000091181	protein_coding	107.953	1.51518	0.143797	10.5369	5.83746e-26	6.32664e-24
ABCC6	ENSG00000091262	protein_coding	1006.09	0.262395	0.0973818	2.6945	0.00704954	0.017822
CMTM6	ENSG00000091317	protein_coding	6556.07	0.0543072	0.0460471	1.17938	0.238245	0.344471
ITGA6	ENSG00000091409	protein_coding	4470.27	0.233695	0.114018	2.04963	0.0404004	0.0795458
RAPGEF4	ENSG00000091428	protein_coding	254.462	0.452952	0.0820816	5.51832	3.42263e-08	3.10934e-07
MAP3K20	ENSG00000091436	protein_coding	2912.54	0.0618667	0.0666102	0.928788	0.352999	0.469617
SMPX	ENSG00000091482	protein_coding	17.1313	-0.183595	0.192321	-0.954628	0.339766	0.455957
FH	ENSG00000091483	protein_coding	3059.39	-0.304017	0.0470493	-6.46167	1.03556e-10	1.46423e-09
SEL1L3	ENSG00000091490	protein_coding	10431.2	-0.0178449	0.059128	-0.301801	0.762804	0.830818
TF	ENSG00000091513	protein_coding	920.353	-2.58657	0.210264	-12.3016	8.88439e-35	1.87881e-32
CDV3	ENSG00000091527	protein_coding	7847.36	-0.0689949	0.0438402	-1.57378	0.115538	0.190826
MYO15A	ENSG00000091536	protein_coding	116.71	-0.0754623	0.0905482	-0.833393	0.404623	0.521827
ALKBH5	ENSG00000091542	protein_coding	4373.89	-0.0631609	0.0391644	-1.61271	0.106807	0.178824
APOH	ENSG00000091583	protein_coding	303.49	0.347796	0.19347	1.79768	0.0722275	0.129421
NLRP1	ENSG00000091592	protein_coding	1532.26	0.367624	0.0847974	4.33532	1.4555e-05	7.51624e-05
PITPNM3	ENSG00000091622	protein_coding	911.979	0.357398	0.0846742	4.22086	2.43374e-05	0.00011942
SPAG7	ENSG00000091640	protein_coding	1922.44	-0.00707602	0.0538164	-0.131484	0.895392	0.927338
ORC6	ENSG00000091651	protein_coding	383.061	-0.753802	0.0873849	-8.62623	6.34074e-18	2.88138e-16
ZFHX4	ENSG00000091656	protein_coding	181.138	-3.37748e-05	0.154888	-0.00021806	0.999826	0.999849
SLC17A6	ENSG00000091664	protein_coding	0.27035	0.114272	0.643765	0.177505	0.859111	0.90154
CPA1	ENSG00000091704	protein_coding	2.50364	0.490153	0.199174	2.46092	0.0138579	0.0318846
ZC3HC1	ENSG00000091732	protein_coding	842.64	-0.357364	0.0412422	-8.665	4.51512e-18	2.09796e-16
ESR1	ENSG00000091831	protein_coding	697.404	0.113076	0.139523	0.810449	0.417682	0.534582
RGS17	ENSG00000091844	protein_coding	600.443	-0.375254	0.126409	-2.96856	0.00299197	0.00842203
ANGPT2	ENSG00000091879	protein_coding	698.56	-0.0741267	0.108696	-0.681962	0.495263	0.608564
TMEM101	ENSG00000091947	protein_coding	2025.54	-0.166953	0.0570989	-2.92392	0.00345653	0.0095505
CD200	ENSG00000091972	protein_coding	457.452	0.496837	0.0701181	7.08571	1.38334e-12	2.68501e-11
CCDC80	ENSG00000091986	protein_coding	6976.06	0.725846	0.100524	7.22065	5.1739e-13	1.08567e-11
CMA1	ENSG00000092009	protein_coding	10.5605	1.9835	0.142001	13.9682	2.43711e-44	9.51836e-42
PSME1	ENSG00000092010	protein_coding	9601.62	-0.201172	0.0578933	-3.47487	0.0005111	0.00178475
PPP2R3C	ENSG00000092020	protein_coding	1164.97	-0.215886	0.0601768	-3.58753	0.000333823	0.00122706
HAUS4	ENSG00000092036	protein_coding	1557.4	-0.141323	0.0581861	-2.42881	0.0151484	0.0344243
JPH4	ENSG00000092051	protein_coding	53.1502	0.927404	0.0920575	10.0742	7.18616e-24	6.42339e-22
MYH7	ENSG00000092054	protein_coding	4.54225	-0.0979512	0.195092	-0.502076	0.615614	0.714215
CEBPE	ENSG00000092067	protein_coding	10.5482	0.0613538	0.125374	0.489366	0.624583	0.721324
SLC7A8	ENSG00000092068	protein_coding	2482.34	-0.087514	0.115581	-0.757166	0.44895	0.564813
OSGEP	ENSG00000092094	protein_coding	1582.55	-0.144328	0.0470659	-3.06652	0.0021657	0.00636283
SLC22A17	ENSG00000092096	protein_coding	836.297	0.318428	0.103308	3.08231	0.00205402	0.00608237
RNF31	ENSG00000092098	protein_coding	1044.92	-0.107446	0.0446653	-2.40558	0.0161467	0.0363765
SCFD1	ENSG00000092108	protein_coding	2807.38	-0.344599	0.0460068	-7.49019	6.8775e-14	1.6722e-12
G2E3	ENSG00000092140	protein_coding	1102.4	-0.407714	0.0710032	-5.7422	9.34558e-09	9.42866e-08
HECTD1	ENSG00000092148	protein_coding	7391.11	-0.118144	0.0532009	-2.2207	0.0263709	0.0553195
HNRNPC	ENSG00000092199	protein_coding	18427.2	-0.265431	0.0379589	-6.99258	2.69874e-12	4.95115e-11
RPGRIP1	ENSG00000092200	protein_coding	81.1786	-0.311487	0.0712717	-4.37041	1.24015e-05	6.50962e-05
SUPT16H	ENSG00000092201	protein_coding	6182.69	-0.2416	0.0470391	-5.13614	2.80434e-07	2.09791e-06
TOX4	ENSG00000092203	protein_coding	3974	-0.122079	0.0338334	-3.60823	0.000308289	0.00114252
GEMIN2	ENSG00000092208	protein_coding	505.12	-0.53045	0.0731593	-7.25062	4.14875e-13	8.82949e-12
TGM1	ENSG00000092295	protein_coding	94.2537	0.294696	0.0924882	3.18631	0.00144101	0.00445677
TINF2	ENSG00000092330	protein_coding	2500.82	-0.0234676	0.0387332	-0.605879	0.544595	0.652984
DAZL	ENSG00000092345	protein_coding	4.81379	-0.0972066	0.186013	-0.522581	0.601266	0.702041
TBL1Y	ENSG00000092377	protein_coding	12.3766	-0.27363	0.363873	-0.751993	0.452055	0.567912
SEMA6A	ENSG00000092421	protein_coding	428.149	0.569657	0.0975776	5.83799	5.28351e-09	5.55544e-08
TRPM7	ENSG00000092439	protein_coding	2034.94	0.170501	0.0545791	3.12393	0.00178452	0.00538571
TYRO3	ENSG00000092445	protein_coding	763.44	0.181172	0.0830781	2.18074	0.0292023	0.0603451
WDR76	ENSG00000092470	protein_coding	526.995	-0.323824	0.0720508	-4.49439	6.97688e-06	3.86371e-05
CAPN3	ENSG00000092529	protein_coding	109.214	0.849955	0.116946	7.26792	3.65066e-13	7.83094e-12
SNAP23	ENSG00000092531	protein_coding	2556.6	0.116392	0.0390981	2.97692	0.00291161	0.00822414
TBX15	ENSG00000092607	protein_coding	539.826	-1.04109	0.146983	-7.08302	1.41045e-12	2.73094e-11
PHGDH	ENSG00000092621	protein_coding	1564.33	-0.500215	0.131699	-3.79818	0.000145762	0.000588312
COL9A3	ENSG00000092758	protein_coding	117.112	-0.322267	0.125449	-2.56891	0.0102018	0.0244793
EZR	ENSG00000092820	protein_coding	29873.2	0.149899	0.0636464	2.35519	0.0185133	0.0409213
MYL6	ENSG00000092841	protein_coding	37834.3	-0.105732	0.0594809	-1.77759	0.0754719	0.134328
AGO1	ENSG00000092847	protein_coding	2214.87	0.0552352	0.0453705	1.21742	0.223443	0.326944
TEKT2	ENSG00000092850	protein_coding	186.914	0.915441	0.161012	5.68556	1.30388e-08	1.28118e-07
CLSPN	ENSG00000092853	protein_coding	376.458	-0.532387	0.104025	-5.11788	3.08987e-07	2.29095e-06
RFFL	ENSG00000092871	protein_coding	1406.39	-0.121172	0.050732	-2.38847	0.0169186	0.0378577
UNC13D	ENSG00000092929	protein_coding	3273.81	0.0443576	0.0999681	0.443717	0.657247	0.747473
MFSD11	ENSG00000092931	protein_coding	1472.16	-0.129229	0.0419193	-3.0828	0.00205062	0.00607312
DPYSL2	ENSG00000092964	protein_coding	7451.87	0.671383	0.0700842	9.57966	9.73667e-22	7.07042e-20
TGFB2	ENSG00000092969	protein_coding	720.417	0.798852	0.11722	6.81501	9.42581e-12	1.5826e-10
GPATCH2	ENSG00000092978	protein_coding	975.938	-0.0583215	0.0510197	-1.14312	0.25299	0.361276
NUP50	ENSG00000093000	protein_coding	2767.18	-0.0795128	0.0412989	-1.9253	0.0541918	0.10169
CDC45	ENSG00000093009	protein_coding	525.611	-0.868343	0.099155	-8.75743	1.99757e-18	9.62207e-17
COMT	ENSG00000093010	protein_coding	6088.99	-0.130657	0.0647209	-2.01878	0.0435102	0.0846219
ADA2	ENSG00000093072	protein_coding	4434.68	0.451768	0.0798631	5.65678	1.54238e-08	1.49586e-07
AC016026.1	ENSG00000093100	lncRNA	6.65607	0.371461	0.139646	2.66002	0.0078137	0.0194689
VNN3	ENSG00000093134	protein_coding	85.2611	0.0534944	0.163489	0.327206	0.743512	0.816143
ECHDC1	ENSG00000093144	protein_coding	2923.22	0.301439	0.0576465	5.22909	1.70343e-07	1.33393e-06
LRRFIP2	ENSG00000093167	protein_coding	2028.99	0.0493027	0.0391746	1.25854	0.208197	0.308689
SEC22C	ENSG00000093183	protein_coding	1878.82	0.114748	0.0311872	3.67931	0.000233861	0.000892147
[truncated: 54,494 more rows]

## Sheet: Sheet2
gene_name	log2FoldChange	pvalue	padj
TSPAN6	-0.154188	0.0182228	0.0403863
TNMD	-0.149816	0.613314	0.712214
DPM1	-0.304992	1.7253e-10	2.33955e-09
SCYL3	-0.0216471	0.606616	0.706481
C1orf112	-0.43247	9.42066e-13	1.88465e-11
FGR	0.579047	9.40369e-12	1.5795e-10
CFH	0.178572	0.0650291	0.118511
FUCA2	-0.292169	8.46107e-08	7.07297e-07
GCLC	-0.630216	6.72603e-06	3.73877e-05
NFYA	-0.117592	0.0162952	0.0366652
STPG1	0.259069	7.71514e-07	5.2755e-06
NIPAL3	0.357448	3.88463e-10	4.99722e-09
LAS1L	-0.208358	8.91098e-08	7.40481e-07
ENPP4	0.217426	0.0010884	0.00349333
SEMA3F	-0.149184	0.0790774	0.1396
CFTR	0.365207	0.0242505	0.0514842
ANKIB1	-0.183834	0.000454962	0.00161127
CYP51A1	-0.0750958	0.314496	0.4295
KRIT1	-0.136066	0.00278066	0.00790882
RAD52	-0.193617	0.000604691	0.00207279
BAD	-0.173476	0.00496742	0.013103
LAP3	0.0740568	0.174512	0.267993
CD99	-0.0665702	0.30647	0.420965
HS3ST1	-0.173618	0.102996	0.173528
AOC1	-0.533577	0.00600418	0.0155029
WNT16	-1.40528	6.81036e-17	2.64318e-15
HECW1	0.143823	0.220471	0.323403
MAD1L1	-0.0653064	0.258667	0.368025
LASP1	-0.0800466	0.129747	0.209919
SNX11	-0.0480293	0.277179	0.38875
TMEM176A	-0.303381	0.00435425	0.0116991
M6PR	0.0327689	0.531985	0.642223
KLHL13	0.17847	0.182579	0.277812
CYP26B1	0.0460948	0.669634	0.757852
ICA1	-0.323181	2.48351e-07	1.87897e-06
DBNDD1	-0.467685	2.28069e-09	2.5608e-08
ALS2	-0.137806	0.000445743	0.00158314
CASP10	0.0242293	0.673842	0.761196
CFLAR	0.228577	6.57355e-05	0.000291
TFPI	0.0375167	0.749726	0.820781
NDUFAF7	-0.165097	1.42351e-05	7.36774e-05
RBM5	0.103785	0.035999	0.0720678
MTMR7	-1.20622	1.87685e-14	4.94921e-13
SLC7A2	-0.739752	1.15951e-05	6.12194e-05
ARF5	-0.353227	2.19428e-09	2.47338e-08
SARM1	0.247609	9.04182e-05	0.000386264
POLDIP2	-0.235138	1.20982e-07	9.80703e-07
PLXND1	0.0806456	0.276586	0.388107
AK2	-0.197486	7.23978e-05	0.000317029
CD38	0.182388	0.10561	0.177149
FKBP4	-0.465311	5.59758e-10	6.9973e-09
KDM1A	-0.235148	4.97592e-08	4.36761e-07
RBM6	-0.0416383	0.45893	0.57444
CAMKK1	0.095757	0.173029	0.26614
RECQL	-0.0196106	0.769856	0.835904
VPS50	-0.171038	0.000168399	0.000667925
HSPB6	1.03071	2.6316e-17	1.0886e-15
ARHGAP33	-0.424523	2.45958e-05	0.000120552
NDUFAB1	-0.299866	6.59496e-09	6.83002e-08
PDK4	0.434461	0.000388754	0.00140252
SLC22A16	0.803132	1.16031e-08	1.15213e-07
ZMYND10	1.30725	1.87043e-18	9.04989e-17
ABCB5	0.929689	1.24998e-07	1.01005e-06
ARX	0.176881	0.379408	0.496546
SLC25A13	-0.343278	6.69072e-10	8.28495e-09
ST7	0.0151345	0.770099	0.836097
CDC27	-0.0532823	0.19871	0.297133
SLC4A1	0.535503	0.000181897	0.000713951
CALCR	-1.1603	1.20542e-11	1.98626e-10
HCCS	-0.189832	1.86651e-05	9.39145e-05
DVL2	-0.203238	1.14617e-05	6.0595e-05
PRSS22	-0.425814	4.242e-05	0.000197084
UPF1	-0.0198372	0.686821	0.771635
SKAP2	0.033597	0.609267	0.708634
SLC25A5	-0.137942	0.0233598	0.0498815
MCUB	0.0307829	0.677725	0.764168
HOXA11	-1.19192	1.83576e-05	9.25071e-05
POLR2J	-0.555298	1.6293e-19	8.98645e-18
DHX33	-0.158332	0.000571121	0.00197269
MEOX1	1.25884	7.84936e-28	1.01882e-25
THSD7A	-0.0207239	0.856712	0.900048
LIG3	-0.309557	1.43999e-11	2.34686e-10
RPAP3	-0.292186	1.11377e-14	3.05209e-13
ACSM3	0.281832	0.00782587	0.0194936
REXO5	-0.31489	1.79692e-06	1.12948e-05
CIAPIN1	-0.260053	1.27217e-09	1.50235e-08
SPPL2B	-0.252183	0.000154057	0.000617347
FAM214B	-0.0661813	0.211536	0.312656
COPZ2	0.0850607	0.32102	0.436452
PRKAR2B	0.0149954	0.882398	0.918199
MSL3	0.0695711	0.0472104	0.0906526
CREBBP	0.184477	4.58466e-05	0.000211216
TSPOAP1	0.218569	0.0343712	0.0693471
MPO	0.148964	0.215444	0.317318
PON1	-0.205389	0.183704	0.279142
GCFC2	-0.161144	0.00052377	0.00182293
WDR54	0.0735644	0.316599	0.431768
CROT	0.153587	0.0110109	0.0261717
ABCB4	-0.463215	8.16962e-05	0.000353321
KMT2E	0.0477613	0.300726	0.414811
RHBDD2	-0.187852	0.000514029	0.00179376
SOX8	0.339258	0.01495	0.0340385
IBTK	-0.0402391	0.402547	0.519845
ZNF195	-0.200293	6.80394e-05	0.000300127
MYCBP2	0.371963	1.02326e-08	1.02591e-07
FBXL3	0.25942	9.03623e-09	9.13783e-08
ITGAL	0.492168	1.49949e-08	1.45786e-07
PDK2	0.191834	0.00164297	0.00500252
ITGA3	0.0105707	0.909911	0.937806
ZFX	0.165282	0.00136649	0.00425636
LAMP2	0.0688569	0.19985	0.29856
ITGA2B	-0.592261	1.70717e-05	8.66718e-05
ASB4	-0.670175	1.83493e-05	9.24763e-05
GDE1	0.172493	0.00114127	0.00363983
REX1BD	-0.236365	0.000728063	0.00243993
CRLF1	-0.651009	0.00214123	0.00630018
OSBPL7	0.0385721	0.619334	0.716921
TMEM98	0.332689	0.000136536	0.00055589
YBX2	-1.14226	2.60882e-11	4.06679e-10
KRT33A	0.416092	0.368248	0.485355
MAP3K14	0.27501	2.2463e-05	0.000111078
ABCC8	-0.430933	0.0342341	0.0690995
CACNG3	-0.237388	0.388114	0.505697
TMEM132A	-0.515999	5.09008e-08	4.45559e-07
AP2B1	0.0637429	0.182627	0.277864
TAC1	0.535727	0.193486	0.290937
ZNF263	0.00461483	0.889195	0.923162
CX3CL1	0.311	0.0128155	0.0298201
SPATA20	-0.169481	0.00759998	0.0190069
CACNA1G	0.192733	0.194366	0.291987
TNFRSF12A	-0.0200584	0.836348	0.885059
DLX6	-0.688038	0.00743791	0.0186408
MAP3K9	-0.187711	0.00641939	0.0164233
RALA	-0.137035	0.00274689	0.00782979
BAIAP2L1	-0.449661	2.65153e-12	4.87279e-11
KDM7A	0.0316501	0.591218	0.693415
ETV1	0.606265	1.36094e-09	1.59804e-08
AGK	-0.203991	3.62253e-08	3.27039e-07
ALDH3B1	0.126857	0.235145	0.340845
TTC22	-0.241363	0.00193128	0.00577453
PHTF2	-0.200049	0.000527122	0.00183372
CCL26	-0.622629	2.9045e-05	0.000140169
FARP2	-0.0653187	0.190725	0.287739
USH1C	0.00560426	0.981073	0.987117
GGCT	-0.469788	9.63183e-13	1.92246e-11
DBF4	-0.616454	5.87893e-20	3.43945e-18
TBXA2R	0.29553	4.90729e-05	0.000224481
IFRD1	-0.542099	3.89128e-13	8.306e-12
LGALS14	-1.23589	0.00315325	0.00880852
COX10	-0.114078	0.00520432	0.0136391
GTF2IRD1	-0.38933	6.56186e-14	1.60282e-12
PAF1	-0.145907	0.00251075	0.00724721
VPS41	0.0367425	0.399247	0.516553
ARHGAP44	0.421829	7.86403e-06	4.2974e-05
ELAC2	-0.11785	0.00291867	0.00824193
SCIN	-0.486037	0.000651799	0.00221552
ARSD	0.0651113	0.400559	0.517818
PNPLA4	0.0717696	0.291114	0.404113
MYH13	-0.0221633	0.896976	0.928436
ADIPOR2	-0.210656	0.000109688	0.000458333
CDKL3	0.0777954	0.237622	0.343803
UPP2	0.180069	0.218336	0.320807
PRSS21	-0.567708	0.00361161	0.00991015
MARK4	-0.124477	0.00977996	0.0236214
PROM1	0.145918	0.455532	0.571121
CCDC124	-0.282588	1.04426e-05	5.57048e-05
CEACAM21	0.514647	1.87097e-07	1.45385e-06
PAFAH1B1	0.184921	1.59784e-07	1.25945e-06
NOS2	-0.709691	3.79748e-07	2.76129e-06
CD300LG	3.30359	1.83206e-86	9.92792e-83
KIAA0100	-0.0305038	0.514501	0.626518
SLC13A2	0.149202	0.591529	0.69359
GAS7	0.857419	1.33359e-30	2.14921e-28
TRAPPC6A	-0.150769	0.0493677	0.0941272
MATK	0.312676	0.00122608	0.00387468
CEACAM7	-0.88682	1.40895e-06	9.06779e-06
CD79B	0.616335	9.81133e-08	8.09864e-07
SCN4A	-1.25324	5.77731e-11	8.52477e-10
ST7L	0.0122353	0.793843	0.85428
TKTL1	-0.0557888	0.799961	0.85903
PAX6	0.572112	1.02018e-13	2.42339e-12
RPUSD1	-0.270016	3.07332e-05	0.000147596
RHBDF1	-0.113893	0.069647	0.125561
LUC7L	0.0251992	0.683574	0.768923
CACNA2D2	0.966554	1.64124e-09	1.89989e-08
BAIAP3	0.06284	0.575536	0.679909
TSR3	-0.0727601	0.167012	0.258672
PIGQ	0.0659173	0.278781	0.390492
CRAMP1	0.0717893	0.139583	0.223102
TEAD3	-0.0728501	0.19551	0.293339
SELE	0.856655	9.53296e-11	1.35766e-09
DNAJC11	-0.183507	1.40438e-06	9.03973e-06
FMO3	0.812129	7.67927e-16	2.553e-14
MYLIP	0.105638	0.0834093	0.145891
NOX1	-0.0401199	0.665108	0.754198
E2F2	-0.616333	4.9806e-12	8.73813e-11
PSMB1	-0.175316	0.000957552	0.00312166
SYN1	0.284558	0.0108372	0.0258013
JARID2	-0.0259794	0.634376	0.72898
CDKL5	0.496675	6.77731e-13	1.3918e-11
CAMK1G	0.539955	1.45132e-12	2.7951e-11
CDK11A	-0.201688	0.00209257	0.00617669
NADK	-0.196927	2.29812e-05	0.000113355
TFAP2B	-0.297998	0.317477	0.432712
TFAP2D	-1.44989	8.64082e-06	4.69054e-05
DLEC1	1.39425	3.5288e-22	2.70283e-20
CYTH3	0.445062	2.4437e-07	1.85294e-06
ADAM22	0.221898	0.0146222	0.0333862
SYPL1	-0.0824518	0.0917822	0.157731
CYB561	-0.231559	2.28336e-05	0.000112717
SPAG9	0.188481	0.000760024	0.00253314
CELSR3	-0.584899	1.52103e-07	1.20328e-06
AASS	0.223126	0.024629	0.0521856
PLEKHG6	-0.3619	0.000243883	0.000925815
SS18L2	-0.22768	4.72664e-06	2.72047e-05
MPND	-0.0184358	0.743419	0.816061
MGST1	-0.429454	1.85924e-06	1.16443e-05
CRY1	-0.182437	0.00020261	0.000785579
PGLYRP1	0.37755	0.00615466	0.0158433
NFIX	0.876489	1.3727e-22	1.09796e-20
ST3GAL1	0.000652265	0.994397	0.996203
MMP25	0.20743	0.0206128	0.0448845
IL32	-0.136159	0.146482	0.232118
PKD1	0.212947	0.000864476	0.0028467
MAPK8IP2	-0.693692	1.01201e-07	8.32496e-07
MED24	-0.248133	1.67823e-07	1.31611e-06
RHOBTB2	0.572425	3.93543e-08	3.52789e-07
HEATR5B	0.0659779	0.127451	0.20693
SEC62	-0.0173016	0.700882	0.782746
RPS20	-0.276541	1.02396e-05	5.47358e-05
CSDE1	0.0317908	0.428917	0.545371
UBE3C	-0.173359	3.51721e-05	0.000166898
REV3L	0.536123	1.82991e-13	4.13826e-12
TENM1	-0.958758	3.69641e-06	2.17904e-05
PAX7	-0.561784	0.10713	0.179255
MASP2	0.500498	4.64353e-07	3.32357e-06
IYD	0.318748	0.0763893	0.1357
FAM76A	0.141732	0.000423114	0.00151131
TRAF3IP3	0.490741	3.14193e-08	2.873e-07
POMT2	-0.235249	1.24954e-06	8.14181e-06
VTA1	-0.0593474	0.188437	0.284969
MLXIPL	-0.595356	1.33427e-05	6.95566e-05
BAZ1B	-0.170196	0.000100878	0.000426035
RANBP9	-0.0131687	0.757544	0.826564
ETV7	-0.259771	0.00263197	0.00754636
SPRTN	-0.142057	0.000459771	0.00162571
EEF1AKNMT	-0.0877571	0.0304941	0.0626026
DYRK4	-0.0640021	0.270115	0.380875
ZNF207	-0.0699897	0.0421249	0.0823391
UQCRC1	-0.269691	3.48783e-07	2.55759e-06
STARD3NL	-0.123847	0.0330132	0.0670064
CD9	0.0584136	0.447699	0.563664
HHATL	0.114905	0.624754	0.72144
NCAPD2	-0.375571	1.32342e-07	1.06226e-06
IFFO1	0.524094	1.85711e-12	3.50803e-11
GIPR	0.209301	0.0615711	0.113165
PHF7	0.0460284	0.339287	0.455536
SEMA3G	0.731419	3.53487e-19	1.87111e-17
NISCH	0.159814	0.00126785	0.00398763
STAB1	0.323731	8.27629e-05	0.000357187
FUZ	-0.0796399	0.186549	0.282623
SLC6A13	0.974899	3.22966e-11	4.95093e-10
IDS	0.205424	0.00353717	0.00974414
PRSS3	-0.619534	0.0044926	0.0120172
ZNF200	-0.0672318	0.085419	0.1487
CD4	0.668219	3.56515e-19	1.88484e-17
LRRC23	0.286365	0.000364663	0.0013258
BTK	0.613683	2.93007e-14	7.49407e-13
HFE	0.0245609	0.692306	0.776069
SCMH1	-0.144136	0.00133777	0.00417922
FYN	0.296076	8.91518e-06	4.82933e-05
HIVEP2	0.186652	0.000467818	0.00165086
FMO1	0.448118	0.000135808	0.00055329
ELOA	0.123299	0.00240047	0.0069646
LYPLA2	-0.135697	0.0170453	0.0381078
CLCN6	0.124017	0.0229163	0.0490966
MRC2	0.453965	9.6104e-09	9.67333e-08
NME1-NME2	-0.226577	0.0175789	0.0391613
SLC6A7	0.115718	0.307387	0.421958
TSPAN9	0.261684	8.60896e-05	0.000369557
BTBD7	0.0822454	0.0884597	0.153053
APBA3	-0.110014	0.0202645	0.0442214
MKS1	-0.085494	0.0416997	0.0816589
ABHD5	-0.0147012	0.758364	0.82723
ANOS1	0.749904	4.89971e-13	1.03113e-11
AKAP8L	-0.0848746	0.0661541	0.120248
MBTD1	-0.020584	0.690195	0.774547
UTP18	-0.182454	1.56647e-05	8.0319e-05
RNF216	-0.0707727	0.0818872	0.143671
TTC19	0.099234	0.0430844	0.0839044
PTBP1	-0.211858	2.02751e-09	2.30337e-08
DPF1	-0.402554	0.00123673	0.00390407
SYT7	-0.642266	4.95478e-07	3.52304e-06
LARS2	-0.0681245	0.0837257	0.146317
PIK3C2A	0.106296	0.0485681	0.092828
PLAUR	-0.0404829	0.663321	0.752802
ANLN	-0.57653	2.44398e-07	1.85294e-06
WIZ	-0.0860649	0.0870258	0.151
RABGAP1	0.0611475	0.126945	0.206276
DCN	0.912914	7.26375e-26	7.79451e-24
QPCTL	-0.178289	0.0046523	0.0123863
PPP5C	-0.1326	0.00204868	0.00606821
CEP68	0.231379	8.49093e-08	7.09657e-07
MAP4K3	-0.0960057	0.0447727	0.0867325
ZBTB32	0.123529	0.174836	0.268339
TYROBP	0.431695	6.5608e-06	3.65396e-05
TMEM159	0.089527	0.242182	0.348969
GABRA3	-0.960713	0.0018002	0.00542562
BRCA1	-0.576066	2.30706e-12	4.29252e-11
ERCC1	-0.0550953	0.255315	0.364032
CD22	1.10473	4.92726e-23	4.06096e-21
SEMA3B	-0.141358	0.278749	0.390459
MBTPS2	-0.0429945	0.37614	0.493312
PRICKLE3	-0.267441	2.24245e-06	1.38325e-05
LTF	1.08543	8.42474e-10	1.02621e-08
EXTL3	0.0425035	0.469035	0.583732
NR1H4	-0.894624	0.00088588	0.002909
ELOVL5	-0.134142	0.0121809	0.0285441
ALOX5	0.536925	1.1112e-09	1.32525e-08
KDM5D	-0.0628075	0.84034	0.887876
CALCOCO1	0.287846	5.0608e-08	4.43314e-07
UBR7	-0.0605622	0.139819	0.223389
MAP4K5	-0.000761736	0.987244	0.991338
EHD3	0.12067	0.0655097	0.119242
PSMC4	-0.395934	1.99637e-13	4.49115e-12
MAN2B2	0.0643311	0.209459	0.310221
SLC7A14	0.396172	0.0598468	0.110559
CLDN11	0.293419	0.0141035	0.0323655
SLC25A39	-0.441248	2.17048e-14	5.67518e-13
MVP	0.0470265	0.492212	0.605705
NUB1	-0.0804761	0.0379614	0.0753804
PGM3	-0.231172	1.08363e-05	5.76625e-05
RWDD2A	-0.114007	0.0254007	0.0535746
CLK1	0.0639124	0.263732	0.373784
POLR3B	-0.071515	0.0946731	0.161847
ANGEL1	-0.077667	0.101878	0.172021
RNF14	-0.00906547	0.837831	0.885937
DNASE1L1	-0.0702055	0.196173	0.29409
DDX11	-0.544611	4.18363e-13	8.89498e-12
HEBP1	0.0565474	0.244474	0.351605
GPRC5A	-0.128952	0.200943	0.299892
MAMLD1	0.0990158	0.337702	0.454138
CD6	0.339355	0.00012731	0.000522249
TACC3	-0.566546	4.45297e-14	1.11338e-12
UFL1	0.0634738	0.106946	0.178995
POLA2	-0.405413	8.90502e-15	2.48584e-13
ZC3H3	-0.367962	4.61762e-11	6.8981e-10
CAPN1	-0.0687823	0.199128	0.297665
ACP3	-0.1302	0.114117	0.188789
MDH1	-0.186842	9.94789e-06	5.33343e-05
SLC30A9	-0.049224	0.239735	0.346249
MTMR11	-0.447337	7.98498e-07	5.43942e-06
COX15	-0.110802	0.00780069	0.0194432
CCDC88C	-0.0193015	0.767796	0.834578
YAF2	-0.0572516	0.306164	0.420633
ZMYND11	0.0372305	0.374224	0.491378
WAS	0.392003	3.7052e-07	2.70099e-06
DPEP1	0.0745721	0.591223	0.693415
BID	-0.201665	0.00271734	0.00775472
MATR3	0.398284	1.70902e-06	1.07876e-05
NPC1L1	-0.400473	0.0564839	0.105315
XYLT2	-0.117457	0.0149206	0.0339832
RGPD5	-0.0509986	0.769682	0.835839
STMN4	-0.0486676	0.823459	0.875523
NUDCD3	-0.0271482	0.533437	0.643503
ISL1	-0.756641	0.00784343	0.0195295
CHDH	-0.128431	0.136169	0.218467
IL20RA	0.449832	0.000270951	0.00101673
SFTPC	3.2457	1.63228e-48	7.37113e-46
CLCA4	0.571755	0.00536028	0.0140072
GLT8D1	-0.0105701	0.730002	0.805661
ATP2C1	-0.118716	0.0198165	0.0433772
IGF1	0.573159	2.54372e-07	1.92185e-06
SLC38A5	0.153686	0.131769	0.212604
RALBP1	-0.0571275	0.232111	0.337338
RUFY3	0.0169123	0.782819	0.845882
CNTN1	-0.32506	0.057168	0.106378
SLC11A1	0.413961	1.40598e-05	7.28218e-05
WWTR1	0.127022	0.0389667	0.0771081
AGPS	-0.0471142	0.296662	0.410327
CXorf56	-0.0740113	0.0430274	0.0838273
SLC6A4	3.15953	3.65273e-77	1.12591e-73
TTC27	-0.192675	2.36788e-06	1.45153e-05
ZNF582	0.193818	0.00657734	0.016771
VSIG2	0.612735	0.000163679	0.000650992
PHLDB1	0.343721	1.12867e-09	1.3446e-08
MARCO	1.19612	2.37241e-17	9.87032e-16
CYP24A1	-1.01172	4.33051e-07	3.11854e-06
PRDM11	0.358066	8.3096e-10	1.01333e-08
SYT13	-0.67052	0.00844085	0.0207843
SNAI2	0.492081	2.00621e-05	0.000100251
CD74	0.504256	5.72583e-08	4.95165e-07
HGF	0.911106	1.93887e-17	8.18443e-16
ZRANB1	0.0542632	0.239884	0.346406
NCDN	-0.0120992	0.809448	0.865701
ADGRA2	0.659791	2.39159e-20	1.47273e-18
ZFP64	-0.154201	0.000222737	0.000854069
MNAT1	-0.253476	7.15615e-08	6.08301e-07
SAMD4A	0.269072	0.00243602	0.00705452
RUNX3	0.426983	2.43434e-07	1.84628e-06
MRE11	-0.10768	0.0122996	0.028777
PLEKHB1	-0.134245	0.187374	0.283675
SERPINB1	-0.315695	2.54924e-05	0.000124481
CYP3A43	-0.0372609	0.809722	0.865952
LGI3	3.01377	3.7203e-57	2.60133e-54
SPAST	-0.119534	0.00963604	0.0233258
NRXN3	-0.249559	0.0491907	0.0938401
OSBPL5	-0.100421	0.233461	0.338937
AQR	-0.00109744	0.979603	0.986131
VGLL2	2.87474	2.95281e-13	6.45864e-12
C8B	-0.0719856	0.738741	0.812283
RTF2	-0.0928969	0.0136624	0.0314966
GABRA1	0.767718	0.063323	0.115904
NLRP2	-0.569394	0.00149614	0.00460889
SLC45A4	-0.26422	0.00191436	0.00572908
RNF10	-0.24145	7.2601e-13	1.48183e-11
ZNF839	-0.179577	0.000184641	0.000723412
ZDHHC6	-0.116124	0.00129989	0.00407614
GRAMD1B	0.0113424	0.938482	0.958288
RNH1	0.0956969	0.0561894	0.10487
NDUFS1	-0.148294	0.000478534	0.00168238
RB1CC1	-0.0692432	0.186854	0.283005
ERP44	-0.142061	0.000220537	0.00084668
ALAS1	-0.060087	0.194206	0.291818
BIRC3	-0.252686	0.0283071	0.0587444
AKAP11	0.25239	4.04505e-06	2.35669e-05
GLRX2	-0.40948	1.703e-15	5.40076e-14
SNAPC1	-0.187386	0.0010779	0.00346321
DERA	-0.390375	1.08044e-09	1.2914e-08
STRAP	-0.361893	1.31257e-09	1.54542e-08
ABCC2	-1.21422	1.34582e-07	1.07745e-06
DEF6	0.104266	0.0707963	0.127238
PLEKHO1	0.103534	0.14238	0.22683
GCLM	-0.564316	1.00682e-08	1.01037e-07
UBR2	0.094817	0.023776	0.0506305
EHD2	0.438085	3.94895e-08	3.53855e-07
DEPDC1	-0.771977	6.52748e-12	1.12115e-10
CCDC28A	0.285169	1.91075e-07	1.48158e-06
RRAGD	-0.272711	0.0017935	0.00540807
HSF2	-0.0144052	0.743945	0.816536
PHF20	0.00106985	0.978546	0.985479
HSD17B6	1.37533	6.35171e-23	5.20528e-21
NR1H3	0.0298166	0.6387	0.732569
TYMP	-0.215116	0.00458655	0.0122368
NCAPH2	-0.195775	0.000163123	0.000649077
TOMM34	-0.0381718	0.476557	0.590776
SEC63	0.0701506	0.0814121	0.142994
KPNA6	-0.038452	0.301629	0.415752
VIM	0.588034	2.2957e-16	8.27291e-15
RTEL1-TNFRSF6B	-0.281547	0.00302949	0.00851272
FAS	0.46598	6.58734e-08	5.63263e-07
RNASET2	-0.229825	0.00198379	0.00590619
CD44	0.403568	2.81325e-07	2.10385e-06
KCNG1	0.342366	0.0299933	0.0617123
AGPAT4	0.548668	5.69773e-13	1.18186e-11
SLAMF7	0.0366781	0.737542	0.811274
BTN3A1	0.182922	0.00254092	0.00732455
MIPEP	0.00747454	0.884493	0.919842
PRKCH	0.334109	1.32558e-11	2.17019e-10
INSRR	0.147646	0.351777	0.468261
IFNGR1	0.284773	4.37678e-06	2.53259e-05
B4GALT7	-0.119689	0.0165724	0.0371983
SH2D2A	-0.13592	0.103457	0.174164
VRK2	-0.190889	5.4476e-05	0.000246261
TNFRSF1B	0.343396	3.8573e-07	2.80009e-06
VEZT	-0.118606	0.00622806	0.0160047
POU2F2	0.0908374	0.314591	0.429561
BRD9	-0.280873	1.81291e-07	1.41205e-06
SNX1	0.181354	2.84295e-07	2.12487e-06
TBPL1	-0.00696335	0.890581	0.92403
ARNTL2	-0.29675	0.0213307	0.0462319
BCLAF1	0.129409	0.000358317	0.00130569
SLC39A9	-0.0678497	0.0834348	0.14592
ANK1	0.788335	4.61448e-08	4.07593e-07
IBSP	0.611421	0.00188032	0.00563965
TFB1M	-0.128834	0.00879563	0.0215355
RABEP1	0.162578	2.55929e-06	1.55742e-05
HMGB3	-1.01527	1.47159e-20	9.35432e-19
NUP160	0.0105656	0.815492	0.870168
BAK1	-0.179325	0.00200176	0.00595039
ADH1B	2.81557	1.57913e-85	6.84584e-82
IKZF2	0.227944	0.00417245	0.0112588
GRN	0.182917	0.00234935	0.00683413
FAM13B	0.357427	6.99396e-11	1.01746e-09
ARHGAP31	0.875653	8.66424e-33	1.64742e-30
CENPQ	-0.217517	0.000760174	0.00253345
SARS1	-0.0193783	0.642007	0.735215
RANBP3	-0.0165608	0.623893	0.720679
ARID4A	0.217388	6.93651e-06	3.84247e-05
EIPR1	-0.334074	1.0306e-12	2.04478e-11
PNPLA6	0.196542	0.000260313	0.000981058
IFT88	0.162687	0.00120725	0.00382298
ALG1	0.0114307	0.817526	0.871567
ZCCHC8	-0.324728	6.36461e-24	5.72445e-22
ABCF2	-0.285572	7.17043e-12	1.22142e-10
CHPF2	-0.273333	7.35128e-08	6.22447e-07
LRRC7	-0.112589	0.24621	0.353738
FUT8	-0.168044	0.023831	0.0507253
UBA6	-0.193523	0.000580374	0.00199835
GAB2	0.193523	0.00458653	0.0122368
ATP6V0A1	0.131542	0.00775235	0.0193338
PIAS1	0.244171	6.65475e-09	6.88208e-08
SLC4A7	0.159207	0.0447395	0.0866836
APBA2	-0.207436	0.0868206	0.150729
MAP2K3	-0.102929	0.0564271	0.105237
CLDN18	2.79418	1.08197e-38	2.95003e-36
TMSB10	-0.388621	2.61135e-07	1.96711e-06
ASTE1	0.010538	0.77544	0.840098
RNF19A	-0.085507	0.253215	0.361562
PEX3	0.0961625	0.058453	0.108367
GABARAPL2	0.0336112	0.492038	0.605508
ADRA1A	2.76638	3.94255e-57	2.71297e-54
SH3YL1	-0.101695	0.0906097	0.156131
FAM136A	-0.464132	3.01993e-28	4.09125e-26
VCL	0.316135	4.64126e-08	4.09639e-07
DEPDC1B	-0.718261	1.0825e-11	1.79804e-10
DAPK2	0.445855	9.06178e-07	6.09348e-06
NSMAF	-0.039441	0.353307	0.469919
ADSS2	-0.0736962	0.0697209	0.125651
STAP1	0.608085	1.60683e-08	1.55212e-07
TIMP2	0.49545	6.74735e-11	9.8391e-10
RFC1	-0.10101	0.0172927	0.0385911
TBC1D23	-0.048961	0.26312	0.373099
CUL3	-0.04178	0.218471	0.320969
MYOM2	0.518588	4.77466e-07	3.4039e-06
AGER	2.72751	5.71576e-76	1.37661e-72
CYP46A1	0.21321	0.0302323	0.0621417
ZZZ3	-0.0159987	0.7412	0.814264
SLC18A1	0.558644	0.000617355	0.00211119
USP2	0.537518	8.81883e-07	5.94301e-06
CASR	1.40676	1.80607e-08	1.7284e-07
TUBG2	-0.193413	0.00107213	0.00344645
RPL26L1	-0.255969	4.2062e-05	0.00019563
FLT4	0.638755	1.08278e-17	4.74629e-16
NSUN2	-0.391147	2.15559e-13	4.82442e-12
FBXO42	0.038398	0.198193	0.296533
MFAP3	0.251405	2.98914e-05	0.000143888
MRI1	-0.031491	0.529068	0.63962
METTL1	-0.257227	0.00043633	0.00155315
HOXC8	-0.638087	0.000500569	0.00175175
AGA	-0.055173	0.475932	0.590195
PI4K2B	-0.203589	0.000131697	0.00053831
BOD1L1	0.0941376	0.0903794	0.155803
MAT2B	0.226276	2.66039e-06	1.61238e-05
TLL1	0.646041	1.97387e-10	2.64845e-09
EDC4	-0.0622381	0.183064	0.278355
TRIO	-0.0846214	0.230742	0.335743
VCAN	0.0272917	0.809555	0.865794
CLEC16A	0.182421	7.73695e-05	0.000336594
MSR1	0.746168	3.00197e-13	6.54306e-12
CDH1	-0.0581683	0.38493	0.502544
MTREX	0.0109211	0.804046	0.861859
DNAH5	0.298103	0.00932138	0.0226603
ZFYVE16	0.123614	0.013724	0.0316151
RIPOR1	0.269252	2.30327e-05	0.000113584
ADGRG4	2.71977	7.36632e-28	9.61881e-26
RAI14	0.00231329	0.974975	0.983297
SOX30	0.0723549	0.646843	0.739035
PNKP	-0.281765	7.8053e-09	7.9862e-08
BEST2	-0.218626	0.264658	0.374827
PHLPP2	-0.0030497	0.958874	0.972483
SPDL1	-0.357518	5.63311e-09	5.89871e-08
STAU2	-0.307107	1.63686e-07	1.2874e-06
SLC66A1	-0.262144	4.44807e-07	3.19418e-06
CTNS	-0.0308126	0.506944	0.619403
RTN4R	-0.107432	0.237949	0.344173
PHF23	-0.16094	0.000232353	0.000886862
CDH10	0.734932	0.000126612	0.00051978
INPP4A	0.0762415	0.0750167	0.133656
RAB27B	0.240603	0.0414248	0.0811793
PSMA4	-0.329121	4.35073e-11	6.52189e-10
MYO16	-0.833697	3.24098e-08	2.95485e-07
LSG1	-0.310413	2.3761e-10	3.15012e-09
PARP3	0.0393447	0.480896	0.594995
TNC	0.0440344	0.750834	0.821808
THAP3	-0.177748	0.000575975	0.00198544
RIPOR3	0.0526337	0.574145	0.678747
TDP1	-0.226489	0.000773285	0.0025731
AIFM2	-0.465542	3.63808e-11	5.52815e-10
C2orf83	-1.3933	1.34781e-07	1.07885e-06
SPATA7	0.0687442	0.165062	0.256076
MED17	-0.0810541	0.0184569	0.0408194
RETSAT	0.0405147	0.478321	0.592463
CAPG	0.167143	0.0246902	0.0522999
AP2S1	-0.16351	0.00307853	0.00862759
USH2A	-0.0265477	0.851447	0.896231
ZPBP	0.71147	0.00159711	0.00488038
TG	-0.324376	0.00764334	0.0190987
ADAM28	0.115604	0.29144	0.404459
BARX2	0.0643655	0.668581	0.757047
DCUN1D1	-0.163865	0.00170109	0.00516028
JADE2	0.265847	7.13209e-06	3.93873e-05
ZIC2	-0.480279	0.0363016	0.0725863
LCP2	0.336035	1.10626e-05	5.8737e-05
TRIT1	-0.37789	1.48665e-13	3.40821e-12
ADRB1	0.845256	9.17059e-09	9.26289e-08
TFF2	2.69826	1.82361e-10	2.46207e-09
CUL7	-0.199598	0.000145469	0.000587296
CTNNA1	-0.0441309	0.328997	0.444736
PHKA2	-0.010363	0.814145	0.869223
CNTLN	0.264699	0.00185346	0.00556756
EPHA3	0.861601	5.07918e-10	6.3898e-09
HSPA5	-0.217034	1.75461e-05	8.88101e-05
DSG2	-0.119335	0.176322	0.270151
GEMIN8	-0.121908	0.0084223	0.0207474
OFD1	-0.0991119	0.0475803	0.0912417
GPM6B	0.575031	1.91023e-09	2.18387e-08
MAGEC2	-0.514376	0.211911	0.313103
PREX2	1.2725	6.48362e-36	1.47161e-33
WDR37	0.101865	0.0185109	0.0409181
YTHDC2	0.174373	0.000228383	0.000873227
CTPS2	-0.186985	0.000109064	0.000456294
ATP6V1H	-0.139483	0.00142101	0.00440466
POLR2B	-0.162152	3.51125e-05	0.000166634
FAM214A	0.18358	0.00216974	0.00637193
ARAP2	0.212578	0.00550421	0.0143428
TPR	-0.0613983	0.184687	0.280341
CP	-0.968536	1.81784e-12	3.43985e-11
KIAA0556	0.117036	0.0157328	0.0355399
DTNBP1	-0.032191	0.391671	0.509229
XK	-0.197163	0.136086	0.218374
ANO2	1.01867	2.63161e-23	2.23697e-21
C12orf4	-0.011027	0.815617	0.870216
SCML1	-0.090552	0.258466	0.367807
WWC3	0.0610543	0.330717	0.446644
ARHGAP6	1.16868	1.91206e-59	1.65784e-56
FAM184B	0.0167388	0.877903	0.914656
MAP4	0.155416	0.000311331	0.00115219
GOPC	0.108164	0.0041677	0.0112474
ROS1	0.799379	1.24469e-08	1.22747e-07
USP28	-0.199839	0.000219544	0.000843317
HDAC9	0.505844	1.98455e-05	9.93124e-05
TSPAN17	-0.0372253	0.465643	0.580507
NOP16	-0.399339	1.68381e-11	2.71464e-10
CC2D2A	0.505799	2.23259e-13	4.97621e-12
RRM2B	0.366693	2.76125e-09	3.0584e-08
ZNF800	-0.0124795	0.799777	0.858933
TNFRSF17	-0.0608933	0.648107	0.740106
SNX29	0.417229	2.46839e-17	1.02402e-15
LMO3	0.333019	0.0122678	0.0287121
MRPS10	-0.273498	1.58929e-07	1.25316e-06
GUCA1A	-0.340182	0.0533936	0.100422
RSF1	0.00421675	0.933801	0.954858
VPS13D	0.377706	4.43731e-10	5.65118e-09
CELF2	0.58488	1.42147e-13	3.26914e-12
FAM120A	-0.0748817	0.0663153	0.12048
R3HDM1	-0.229086	4.74172e-07	3.38375e-06
COL9A2	-0.0181682	0.88999	0.923781
KITLG	0.0151258	0.862995	0.904316
ERCC8	-0.0329506	0.489587	0.60328
ADAMTS6	0.147468	0.179224	0.273785
H6PD	0.0556254	0.345169	0.461631
VAMP3	0.174384	2.56261e-06	1.55878e-05
PER3	0.39038	2.20966e-05	0.000109428
UTS2	0.0114222	0.94541	0.963139
TNFRSF9	-0.172382	0.130008	0.210263
EPN3	-0.589212	1.50827e-09	1.76007e-08
LTBP1	0.628018	2.7107e-14	6.95761e-13
RCN1	-0.227523	0.000182958	0.000717858
ELN	1.41566	9.32698e-41	2.86768e-38
RFC2	-0.444692	3.45235e-15	1.04225e-13
ARID1B	0.148077	0.000362379	0.00131894
CLPTM1L	0.0308944	0.644632	0.737441
NEDD4L	0.189158	0.0176606	0.0393171
FOXP3	0.291028	0.000695502	0.00234386
PPP1R3F	-0.17422	0.0267075	0.0559065
HEXB	0.132572	0.00992181	0.0238988
PTCD2	0.10019	0.0255584	0.0538522
NEXMIF	0.159884	0.331302	0.447225
JKAMP	-0.0179272	0.640704	0.734243
DKK3	0.982329	1.53682e-33	3.04221e-31
ARHGEF5	-0.22628	4.03566e-05	0.00018867
NFE2L3	0.156357	0.0824217	0.144422
MCUR1	-0.113949	0.00987972	0.0238117
LIMA1	0.0686328	0.272792	0.383852
LETMD1	-0.160272	0.00108506	0.00348414
SLC4A8	-0.292255	0.0185639	0.0410143
LAMC3	0.764788	1.01503e-13	2.41512e-12
PTGER3	0.11281	0.441346	0.557414
TNIP3	-0.28307	0.0505603	0.0959223
MAPK9	-0.0104906	0.830591	0.880752
COL23A1	0.523961	6.54979e-06	3.64923e-05
BCAR1	-0.0566824	0.376758	0.493898
FAM160A2	0.00593418	0.892108	0.925032
HERPUD1	0.063926	0.251113	0.359175
HOMER3	-0.192807	0.0121633	0.0285122
RAD51	-0.685122	1.2955e-15	4.16327e-14
POLQ	-0.903235	1.69997e-18	8.27129e-17
PIK3CB	-0.0230351	0.679609	0.765703
CYBA	-0.260718	0.00181654	0.00546956
THOC3	-0.36861	3.93747e-09	4.24514e-08
HEBP2	-0.260597	3.94225e-06	2.30374e-05
MPHOSPH9	-0.338866	4.1942e-07	3.02592e-06
PLEKHA5	-0.0933826	0.180323	0.275114
PRSS8	-0.244188	0.00402856	0.0109181
SIKE1	-0.0660603	0.163304	0.253902
RRP12	-0.279089	5.82319e-07	4.0849e-06
FNIP2	0.261964	0.00199212	0.00592621
MSMO1	-0.228875	0.000823149	0.00272427
TTC17	-0.0388257	0.348319	0.464818
ALX4	0.747698	0.000296523	0.00110351
FSTL4	-0.51801	0.00543469	0.0141777
FOXN3	0.473554	9.70933e-17	3.70527e-15
METTL24	0.865345	8.21001e-17	3.15851e-15
AKR7A2	-0.0287871	0.564953	0.670955
MRTO4	-0.371791	5.35147e-12	9.35472e-11
NNAT	0.114019	0.291477	0.404497
USE1	-0.188819	0.000574519	0.0019819
MCF2L2	-0.253476	0.0102321	0.0245405
NRIP2	0.453575	9.50521e-15	2.63472e-13
LAMA3	0.24083	0.108368	0.180928
AP5M1	-0.0244652	0.533948	0.643967
ANAPC4	-0.0634363	0.132239	0.21321
KCNQ1	0.0826273	0.474278	0.588631
TRAPPC3	-0.0990116	0.0213155	0.0462082
THRAP3	-0.0195584	0.527098	0.637879
PHPT1	-0.379025	3.88234e-07	2.81544e-06
ENTPD2	-0.526172	0.000179419	0.000705437
LY75	0.0772737	0.348435	0.464937
ARID4B	0.0317542	0.465638	0.580507
OPN3	-0.594603	2.04932e-07	1.57661e-06
SDCCAG8	0.0203466	0.655661	0.746183
PTPRN	-0.859157	6.28449e-06	3.51044e-05
HHAT	0.290138	6.8766e-05	0.000302931
KIF1B	0.00139407	0.978527	0.985479
FOXC1	-0.0194154	0.861997	0.903513
TBC1D22A	0.0587061	0.154865	0.242977
SYNE2	0.13027	0.087079	0.15108
PLEKHH1	-0.741075	7.15188e-09	7.36107e-08
ATP9A	0.12995	0.050511	0.0958443
SPO11	-0.169122	0.813266
SCGB1A1	2.68922	1.30953e-28	1.83131e-26
CHRDL2	-0.285516	0.0510073	0.0966168
FAM168A	-0.0125215	0.80093	0.85973
RELT	0.0024458	0.969987	0.979875
GALC	0.207845	0.000202032	0.000783687
NOP58	-0.322158	8.46726e-16	2.79516e-14
SZRD1	-0.0464051	0.240985	0.34766
KCNH2	-0.732529	4.78369e-06	2.74897e-05
CUL1	-0.139614	1.10183e-05	5.85301e-05
FAM114A2	0.198324	1.1552e-06	7.57761e-06
CYFIP2	0.36763	7.70914e-06	4.21659e-05
TAB2	0.0839602	0.0463647	0.0892899
GINM1	0.168258	0.000134995	0.000550389
EIF2AK2	0.0100275	0.84688	0.892689
USP36	-0.109053	0.00619372	0.0159315
KMT2C	0.0584196	0.377693	0.494854
MCOLN3	0.100684	0.467317	0.582008
CCDC85A	0.762577	2.43761e-11	3.82189e-10
PUM2	0.0112507	0.726901	0.803237
MRPL43	-0.180481	0.000881084	0.00289567
ITIH4	-0.520338	1.27241e-05	6.66124e-05
ITIH1	0.358146	0.0102384	0.0245522
HPF1	-0.00101866	0.982845	0.988224
ZFR	-0.0429	0.235513	0.341287
ZNF280C	-0.168748	0.00176576	0.00533666
NPFFR2	-0.0463542	0.863186	0.904431
PHF21B	0.154082	0.403729	0.520971
TRAF1	0.219861	0.00258911	0.00744318
RC3H2	0.0466735	0.376684	0.493831
IL17RB	-0.173625	0.0708906	0.127362
TRAF3IP2	0.219184	4.80655e-06	2.76138e-05
GYG2	-0.334084	0.000776225	0.00258138
DCBLD2	-0.190687	0.111364	0.18509
SERPINB3	0.115901	0.673574	0.760992
SOAT1	-0.0143354	0.774515	0.839461
PKP2	-0.228503	0.123486	0.201573
MSH4	-0.258579	0.0537102	0.100932
SEC14L3	2.67585	8.73973e-37	2.07041e-34
GDI2	-0.149477	0.000871186	0.00286574
PRDM1	0.184633	0.0190825	0.0419826
ATG5	-0.0345277	0.462464	0.57764
TMCC3	0.228685	0.00519227	0.0136116
PITHD1	-0.0563972	0.12815	0.207809
MTA3	-0.337633	1.16316e-14	3.17541e-13
USP13	0.120844	0.0789409	0.139393
ATP11B	0.0358757	0.55628	0.663325
LAMC2	-0.100099	0.462914	0.578069
CDK14	0.413174	4.64435e-07	3.32357e-06
SEC61A1	-0.273432	1.44707e-11	2.35752e-10
PPP1R12A	-0.0261789	0.596332	0.697781
RASGRF1	1.12673	7.78834e-13	1.57923e-11
CAMK2B	-1.19865	5.03714e-10	6.34797e-09
CROCC	0.236366	0.00121492	0.00384447
POLR3E	-0.141774	0.000332846	0.00122398
ATP2B4	0.0571686	0.431133	0.547546
ZC3H11A	-0.0613347	0.190822	0.28784
RIOK2	0.0744557	0.0516658	0.0977019
YIPF1	-0.135229	0.00133592	0.00417465
NDC1	-0.384196	1.67793e-10	2.28389e-09
DGKG	-0.256728	0.00987204	0.0238027
FLYWCH1	0.0709456	0.178918	0.273384
UNKL	-0.0589155	0.31889	0.434201
TBXAS1	0.0560779	0.464011	0.579038
PARP12	-0.136597	0.0110231	0.0261992
ALDH18A1	-0.3338	1.95382e-11	3.10718e-10
TARBP1	-0.146622	0.0234893	0.0501062
GATB	-0.113198	0.0190174	0.0418614
MXD1	-0.123737	0.134733	0.216604
CDK17	0.0731519	0.119656	0.196341
DNAJC25	-0.272626	2.28073e-11	3.59412e-10
SLC2A3	0.0948848	0.371269	0.488297
PSD	0.158106	0.0398268	0.0785734
CTDP1	-0.0331135	0.458642	0.57419
YBX3	-0.078732	0.166166	0.257557
STYK1	-0.357506	0.000492269	0.00172521
WNK1	0.125048	0.0509542	0.0965414
CCAR1	-0.249575	1.91206e-13	4.31728e-12
OGFR	-0.109471	0.0450355	0.0871402
GNA15	-0.0472783	0.534056	0.644045
CREB3L3	-0.339358	0.0526781	0.0993
PIGV	-0.0155997	0.748955	0.820206
PTPRU	0.4299	7.27032e-06	4.00792e-05
SNRNP40	-0.108188	0.0118174	0.0278051
RIMBP2	-1.27925	1.25356e-08	1.2351e-07
COL11A1	0.207857	0.273952	0.385222
QSER1	0.00223607	0.968377	0.97874
MPC1	0.0630155	0.308752	0.423258
ACAA1	0.0834968	0.116	0.191421
BCAT1	0.372969	0.00269083	0.00769071
HDAC7	0.0666593	0.16806	0.259936
LZTS1	0.411104	4.07786e-07	2.94786e-06
PRDM6	1.08029	5.47383e-37	1.32571e-34
WNT8A	0.0111978	0.970527	0.980194
SPAG4	-0.784003	1.2215e-19	6.84168e-18
NCKAP1	-0.170655	0.000171982	0.000680331
MRPS35	-0.44019	3.15942e-11	4.857e-10
GUCY1B1	0.144923	0.036978	0.0737594
SFSWAP	-0.195682	1.40335e-06	9.03712e-06
TNK2	-0.143778	0.0230936	0.0494153
MON2	0.0146836	0.798013	0.857618
CDH3	-0.246998	0.0624995	0.11458
ARSF	0.261234	0.0706273	0.127
GPBP1	0.0278385	0.414785	0.531688
DGAT2	-0.276502	0.00332815	0.00923523
ZNF112	0.101399	0.0692866	0.125009
CS	-0.214971	1.08463e-06	7.1591e-06
LTK	-0.317408	0.0282652	0.058663
MRPS24	-0.427773	7.93236e-09	8.09752e-08
ELMO2	0.0327285	0.381493	0.498779
WAPL	0.0702503	0.0805998	0.141797
VMP1	-0.131335	0.0614841	0.113034
APPBP2	0.098242	0.0129297	0.0300247
POLD1	-0.317942	5.24401e-08	4.5779e-07
SEZ6	0.10879	0.552724	0.660283
EIF4B	-0.025621	0.59314	0.695004
SLC6A16	0.194701	0.0373758	0.0744562
BICRA	-0.24559	5.78235e-05	0.000259822
SPHK2	-0.114887	0.0433845	0.08442
RPL18	-0.262034	0.000119436	0.000493781
CA11	-0.215105	0.0274154	0.0571812
ISOC2	-0.288771	3.46515e-06	2.0515e-05
U2AF2	-0.274145	2.20241e-10	2.9333e-09
EPN1	-0.147382	0.00525008	0.0137474
MED29	-0.0561176	0.218974	0.321578
AHRR	-0.30344	0.0201553	0.0440165
GSC2	-0.175673	0.74167
ZNF275	-0.0422052	0.421685	0.538624
MTMR1	-0.0180633	0.647882	0.739949
GPC1	0.159887	0.093573	0.160301
ADCK1	-0.135243	0.0101445	0.024362
HAGH	-0.0100907	0.855619	0.899219
RNF4	-0.16142	7.25745e-07	4.98929e-06
CASP8	-0.0939347	0.0367981	0.0734505
LIMCH1	0.140331	0.0935941	0.160331
INTS13	-0.284749	4.55849e-06	2.63037e-05
TM7SF3	0.0884335	0.213313	0.314703
DLX3	0.244666	0.10803	0.180487
SPA17	0.267754	0.000262895	0.000989926
TSPAN32	0.478452	2.57348e-06	1.56518e-05
CCN5	0.521065	8.54011e-07	5.77764e-06
DMRT3	-0.290183	0.202759	0.302219
ST3GAL6	0.320868	0.000116352	0.000482733
ATP2C2	-0.145466	0.178198	0.272504
NGFR	1.18103	1.72311e-21	1.2186e-19
CDON	0.0361883	0.734218	0.80882
TAF2	-0.242713	1.39475e-06	8.98843e-06
HIPK2	-0.153073	0.0493602	0.094122
TNPO3	-0.246511	3.79775e-09	4.10983e-08
BORCS8-MEF2B	-0.0422466	0.573337	0.678013
RFXANK	-0.213243	0.000266581	0.00100194
TMEM161A	-0.232256	6.83875e-05	0.000301509
LPAR2	-0.0914883	0.109885	0.183058
CTSA	-0.261093	1.27272e-05	6.66205e-05
SUGP2	-0.0111015	0.833767	0.88319
SLC12A2	-0.0162475	0.870937	0.910099
SNX24	0.120275	0.0107198	0.025561
EYA2	-0.479307	0.00534978	0.0139865
CNN2	0.0760756	0.192434	0.289696
ABCA7	-0.248727	0.00154727	0.00474526
SNCAIP	0.356154	0.00122912	0.0038826
DDX20	-0.0430442	0.238881	0.34521
BTBD1	0.028147	0.428693	0.545165
FAR2	0.438569	5.25846e-06	2.99599e-05
BCAS1	0.299736	0.0946276	0.161788
POU1F1	0.425925	0.0013095	0.00410095
CHI3L2	0.700714	3.89752e-07	2.82504e-06
SBNO2	-0.316387	1.19792e-06	7.82935e-06
PMS1	-0.190666	6.51757e-06	3.63174e-05
HMG20B	-0.191842	0.000213963	0.000824216
CALCRL	1.04003	3.25061e-43	1.15509e-40
TAF11	-0.179848	4.71162e-05	0.000216513
ANKS1A	0.136256	0.00516203	0.0135471
AP3D1	-0.176119	6.76187e-05	0.000298453
ZNF76	-0.169165	0.000356002	0.00129856
SLC9A3R2	0.0787304	0.323074	0.438518
NTHL1	-0.27259	0.000236948	0.000902494
UHRF1BP1	-0.0539449	0.304438	0.418741
GNAI3	-0.0644597	0.116327	0.191859
IPO5	-0.134013	0.00870284	0.0213421
OAT	-0.460921	1.179e-08	1.16934e-07
WDR3	-0.186387	0.000305379	0.00113268
PKN2	-0.152237	0.00249595	0.00720738
WDR18	-0.284733	7.0448e-06	3.89698e-05
TRAM2	0.243348	1.13598e-05	6.01232e-05
NTN1	0.336426	0.00695426	0.017614
GLP2R	0.981751	1.52006e-07	1.20273e-06
MCM10	-0.83808	8.85142e-15	2.47247e-13
DGKA	0.095207	0.172337	0.26533
ERBB3	-0.187991	0.0149011	0.0339479
ROPN1	0.421917	0.105733	0.177336
ANKRD44	0.766474	1.31606e-22	1.0546e-20
KARS1	-0.19482	5.84609e-06	3.29313e-05
ADAT1	0.0190447	0.665995	0.754987
PDIA5	-0.302716	8.53981e-08	7.13191e-07
TBC1D22B	-0.104489	0.00313527	0.00876395
NDUFB4	-0.421526	1.84484e-14	4.86777e-13
SPEN	0.117444	0.0168314	0.0376879
MYLK	0.902587	1.86557e-33	3.65955e-31
ZC3H15	-0.286754	9.61032e-13	1.91905e-11
MAP2K4	0.0370567	0.337612	0.454036
PACC1	-0.327037	4.97101e-08	4.36418e-07
SNAP91	-0.045631	0.825077	0.876771
SLK	0.0570276	0.313206	0.428102
CYB5R4	0.094264	0.0856568	0.149042
COL17A1	0.858596	8.5277e-06	4.63449e-05
GSTO2	-0.111395	0.308027	0.422529
SEC61A2	-0.354061	1.11382e-08	1.10901e-07
PRKCQ	0.476319	5.30317e-07	3.7474e-06
TLE2	0.0982294	0.21462	0.316362
ASB1	-0.0170205	0.671893	0.759698
FAM107B	-0.0883399	0.20556	0.305573
ME1	-0.351868	0.000605138	0.00207416
TBC1D1	0.196234	0.00318337	0.00887953
CDK13	-0.0612949	0.100365	0.169888
MTHFD2	-0.636393	3.47643e-16	1.21345e-14
SLC9A7	-0.151608	0.0431881	0.084095
FOXJ2	0.0966659	0.0283796	0.0588778
YBX1	-0.143657	0.00512458	0.0134599
PDE4A	0.0744063	0.234099	0.339624
PPP2R5A	0.144975	0.0108311	0.0257908
CTNNA2	0.446622	0.044397	0.0860855
ELAVL1	-0.156353	1.79892e-08	1.72309e-07
TIE1	0.843714	2.25052e-33	4.35555e-31
DIP2B	-0.143645	0.00778253	0.019403
SMARCD1	-0.295365	9.38342e-12	1.57732e-10
KDM4A	0.0464381	0.219215	0.321815
NFYC	-0.0626502	0.117321	0.193271
ZMYND12	0.283499	0.00206528	0.00611152
SLC9A3	-0.603939	4.01883e-05	0.000187989
NGEF	-0.213963	0.117526	0.193557
ASPM	-0.817677	1.93237e-14	5.08018e-13
CD84	0.613042	6.74748e-11	9.8391e-10
ELOVL1	-0.0842935	0.0813099	0.142849
SPI1	0.460601	1.27237e-07	1.02546e-06
ZNRD1	-0.290895	1.15879e-07	9.42515e-07
MPPED2	0.750321	2.18008e-10	2.90534e-09
CGB5	2.67419	5.2167e-15	1.51938e-13
ZBTB11	-0.026462	0.488259	0.602019
ATXN3	0.115397	0.0157101	0.0355053
GOLGA5	-0.305511	4.00083e-15	1.19616e-13
FGFR2	0.878698	8.45339e-16	2.79323e-14
LRRC40	-0.146889	0.00334973	0.00928737
ISOC1	-0.0417394	0.392955	0.5105
EML1	0.663913	4.02301e-17	1.61786e-15
TRMT11	-0.0745429	0.109646	0.182731
THUMPD1	0.122769	0.000884011	0.00290375
MSANTD3	-0.191748	0.000301936	0.00112135
KIF26A	0.511714	4.17214e-05	0.000194213
ATG2B	0.0605699	0.25903	0.368397
ARFGEF1	-0.0911751	0.11865	0.195073
ACSM2B	0.118113	0.620707	0.718183
ZFAT	-0.443067	1.8757e-11	2.99644e-10
MTFR1	-0.465561	7.97172e-12	1.34628e-10
STAG3	-0.0930359	0.439159	0.55538
FECH	-0.243684	0.000173412	0.00068499
MYO9A	0.338563	8.41727e-08	7.04315e-07
DDX3Y	-0.0262004	0.93066	0.952702
PFKP	-0.581842	8.31304e-10	1.01346e-08
IDI1	-0.224881	0.000809003	0.00268134
SP100	0.135197	0.00331056	0.00919111
KLF6	0.447193	1.15771e-11	1.91416e-10
PLPP1	-0.115107	0.127626	0.207129
NEO1	0.116983	0.155612	0.243873
TRAM1	0.14682	0.0372124	0.0741749
PHKA1	-0.390048	3.16379e-10	4.12253e-09
TNFRSF1A	-0.167864	0.00347017	0.00958576
CACNB1	0.102819	0.29888	0.412723
EVI5	0.213089	0.000169338	0.000671343
STOML1	-0.103691	0.0959782	0.163703
PKM	-0.287571	1.76938e-06	1.11395e-05
DHX29	0.0900573	0.0622039	0.114135
DNTTIP2	-0.255778	9.01873e-09	9.12865e-08
METTL22	-0.111095	0.008839	0.0216271
TP53BP1	0.0241081	0.641257	0.734609
TRO	0.318214	0.00203238	0.00602775
RRP15	-0.163426	0.000339902	0.00124612
RHOA	0.0657212	0.0883253	0.152857
DHX8	-0.0223704	0.52075	0.632244
PRKCZ	0.0630912	0.460348	0.575727
ZFY	-0.0551694	0.869995	0.909586
IARS2	-0.24569	8.53777e-08	7.13159e-07
SYT1	-0.338058	0.036432	0.0728103
NAV3	0.708776	6.55281e-10	8.13044e-09
IDH3G	-0.243742	9.07307e-07	6.10012e-06
ROGDI	0.0331999	0.582644	0.686045
PDZD4	0.41866	0.0010424	0.0033621
ATP2B3	0.68463	0.000346491	0.00126824
ROCK1	0.246365	1.33189e-06	8.62051e-06
CBFB	0.00658832	0.861729	0.903384
PDK3	-0.323094	1.45875e-05	7.53215e-05
HYAL2	0.0555085	0.298659	0.412524
HDAC4	-0.0669723	0.244288	0.351396
RASSF1	0.0110168	0.799297	0.858593
FGFR3	0.481004	0.000942614	0.00307759
IFI35	-0.206659	0.00874585	0.0214294
HEATR6	-0.042203	0.322352	0.437746
COASY	-0.371087	4.96837e-16	1.69999e-14
PLEKHH3	-0.120575	0.0479359	0.0918262
MEF2A	0.283378	1.19093e-12	2.33194e-11
OTUD5	-0.0572209	0.170243	0.262572
TFE3	-0.0544798	0.224162	0.327774
TBC1D25	-0.0720676	0.0950471	0.162364
ACSL4	0.102587	0.189555	0.286357
INPP5A	0.157813	0.000351335	0.00128392
GPKOW	-0.137657	0.00508612	0.0133682
GRIPAP1	-0.161705	0.0015259	0.00468888
FTSJ1	-0.274496	2.25305e-09	2.5337e-08
PRR11	-0.527191	1.0306e-07	8.46026e-07
REEP1	0.333457	0.0174022	0.0388177
ATP11A	0.0106378	0.910556	0.938304
POLR1A	-0.125698	0.00857553	0.0210779
LAPTM4A	0.0669047	0.139783	0.223339
TTC7A	0.0510128	0.301682	0.415805
IP6K2	-0.125755	0.00154685	0.00474452
STON1-GTF2A1L	0.233298	0.0827973	0.144969
SRBD1	0.049884	0.193803	0.291321
KIF2A	0.0650556	0.287852	0.400487
RASGRP2	0.977734	3.0354e-27	3.74903e-25
PSME4	-0.184406	3.37912e-05	0.000160838
IFT80	0.0419815	0.516581	0.628398
SIRT2	0.0334303	0.515666	0.627548
ERLEC1	-0.137936	0.00665102	0.0169351
PPP2R5B	-0.0537183	0.308271	0.42275
PYGM	0.682782	1.34156e-12	2.61508e-11
ANGPTL7	2.66823	1.57009e-54	9.45367e-52
PITX1	-0.654178	6.67329e-05	0.000294959
TRPC7	-0.147404	0.652538	0.743542
MAST4	0.259751	0.000719138	0.00241376
ADGRF5	0.870425	4.02975e-14	1.01451e-12
SDK2	0.51109	0.000192841	0.000751736
ADAM7	-0.382796	0.314781	0.429793
NUP133	-0.0914444	0.017871	0.0397203
NUCKS1	-0.0187506	0.687847	0.77252
VPS35	-0.0629796	0.103362	0.174044
DNAJA2	-0.0770003	0.0515676	0.0975376
BCL3	-0.510531	1.83856e-11	2.94115e-10
KCNAB2	0.410645	4.52734e-09	4.82827e-08
ABCC9	0.747051	6.67407e-13	1.37386e-11
FABP4	2.64353	3.89571e-77	1.12591e-73
CLEC2D	0.194209	0.0212551	0.0461094
FUNDC1	-0.224796	1.97704e-05	9.89594e-05
MAOB	0.56752	1.19483e-07	9.69645e-07
RORA	0.661042	9.4328e-14	2.25058e-12
DRD4	-0.647819	2.14662e-08	2.02174e-07
TGFBR3	1.33771	1.10365e-54	6.83507e-52
PLA2G10	0.164951	0.328711	0.444488
HES2	-0.0613193	0.673496	0.760923
ATP1B3	-0.127847	0.037511	0.0746947
NEDD4	0.158063	0.0313574	0.0641381
PIGB	0.0947908	0.051918	0.098089
MAPK6	-0.302924	1.18091e-06	7.73e-06
GNB5	0.0186672	0.677414	0.763878
RAB27A	0.32181	1.48462e-06	9.49703e-06
HDHD5	-0.175735	0.000645212	0.00219599
UFD1	-0.356961	1.26283e-14	3.4195e-13
LRP6	0.14086	0.028871	0.0597458
GUCY2C	-0.402102	0.000544574	0.00188912
SCT	-0.161459	0.167142	0.258816
PHRF1	-0.0882687	0.0640027	0.116931
ELP1	-0.0387909	0.307696	0.422234
NUCB2	-0.174442	0.00475615	0.012623
PFN2	-0.764449	2.12071e-12	3.9628e-11
PTPN3	-0.0579033	0.361808	0.478905
SPTB	-0.0905223	0.59727	0.698561
DAPP1	0.290583	0.000641774	0.00218608
KCNA4	2.64078	3.39541e-64	4.08882e-61
SLC44A1	-0.184666	0.00108962	0.00349672
TMEM260	-0.198532	0.000296998	0.001105
SMG6	0.335949	9.69121e-12	1.62159e-10
EXOC5	-0.086706	0.076406	0.135719
CLTCL1	-0.242699	0.00258185	0.00742476
FGF22	0.0708073	0.575611	0.679928
FSTL3	0.104701	0.302256	0.416378
DGCR2	-0.0268489	0.608598	0.708009
RNF126	-0.240347	1.12796e-05	5.97716e-05
MNT	-0.0405859	0.347605	0.46408
ZXDC	0.00673779	0.873398	0.911825
JMJD6	-0.27788	1.56206e-10	2.14367e-09
POLB	-0.0578187	0.437555	0.553933
ST6GALNAC1	-0.0955698	0.471242	0.585751
WIPI1	-0.152475	0.00208133	0.00615063
FRMPD1	-0.329546	0.0395728	0.078122
GBA2	-0.218354	7.24927e-06	3.99835e-05
NDST1	0.344207	8.47483e-11	1.21777e-09
ASNS	-0.589933	3.07584e-12	5.60032e-11
AP3M2	0.0544801	0.325096	0.440602
CNGB1	-0.0607914	0.705493	0.786437
ST6GALNAC2	0.252002	0.0216527	0.0468058
CHAT	-0.145962	0.699465	0.781667
PABPC1	-0.400082	9.24643e-11	1.31902e-09
TESK2	0.226276	3.02656e-05	0.000145543
CFAP20	-0.12672	0.0025727	0.00740475
CSNK2A2	-0.149338	6.54758e-05	0.000290088
PTPN21	0.69659	2.04325e-27	2.54537e-25
EIF2B3	-0.190959	3.99081e-06	2.3279e-05
CAMK2A	0.808452	3.94211e-17	1.58975e-15
TCOF1	-0.284254	7.44328e-08	6.29744e-07
CDC42	0.073973	0.112486	0.186532
OSBPL3	-0.00909346	0.897395	0.928649
EPHA8	-0.096324	0.649239	0.74099
SLC12A3	0.42486	0.00018936	0.000739828
RAD18	-0.185404	3.75715e-05	0.000176947
ATP2B1	-0.214307	0.00488017	0.0129066
TRPM5	-1.28969	1.21306e-11	1.99728e-10
NCK2	0.00655251	0.890904	0.924274
MAP4K4	-0.0344607	0.616153	0.714555
MGAT4A	-0.136661	0.0449137	0.0869566
RPL31	-0.275734	3.99847e-05	0.000187174
WDR1	-0.038477	0.346995	0.463504
SNX13	0.204625	0.00143716	0.0044471
MS4A12	0.0814077	0.85718	0.900314
ARHGAP10	0.235424	0.00107286	0.00344829
RPS6KA2	0.385137	3.06925e-07	2.27761e-06
ING3	0.02474	0.562699	0.669083
VASH1	0.478313	2.1671e-14	5.66976e-13
LMCD1	0.622853	4.06806e-25	4.11092e-23
BUD23	-0.41726	1.90509e-19	1.03995e-17
SEL1L	-0.0279249	0.605095	0.705213
TRIP13	-0.687436	7.92028e-11	1.14339e-09
ATP6AP1	-0.119435	0.00778439	0.0194059
TCF3	-0.229332	3.25655e-05	0.000155534
TRIB2	0.116536	0.147503	0.233429
DAZAP1	-0.21689	7.70711e-10	9.43838e-09
MBD3	-0.218439	0.000149781	0.000602346
PRLH	0.140357	0.595675	0.697147
HLTF	-0.442048	4.49366e-12	7.93843e-11
FAM50A	-0.415198	6.14369e-12	1.05943e-10
FAM3A	-0.288962	1.06863e-06	7.06207e-06
CPSF1	-0.314915	3.69597e-07	2.69517e-06
MYO3B	0.102137	0.557631	0.664626
CYBRD1	1.00667	1.04488e-31	1.90326e-29
CDH19	0.622845	0.000684955	0.00231334
PDCD2	-0.0726905	0.0845035	0.14742
SLC6A15	-0.516058	0.0778799	0.137888
RDH11	-0.230216	5.63648e-06	3.18915e-05
PRKACA	0.0292098	0.491397	0.604942
ADGRL1	-0.0117493	0.876327	0.913586
SPP2	-1.02611	3.97615e-06	2.32029e-05
ACTN1	0.139659	0.04088	0.0803003
ZFYVE26	0.132867	0.00435804	0.0117079
RPS6KA6	-0.00586571	0.963609	0.975603
EPN2	-0.00244437	0.962096	0.974505
PTPN18	0.0607128	0.171301	0.263989
LIMS2	0.957495	9.5778e-37	2.25661e-34
ASIC4	-0.154111	0.254092	0.362611
SPEG	0.0540286	0.662068	0.751675
LNX1	-0.192578	0.00724898	0.0182496
ALDH3A2	-0.136909	0.144826	0.230057
TFRC	-0.333448	0.000240716	0.000914835
SREBF1	-0.357047	3.2745e-07	2.41294e-06
TRPC5	1.15794	4.66922e-05	0.000214822
AFF4	0.138654	0.0102874	0.0246573
UBE2D1	-0.206317	1.69532e-05	8.60907e-05
MPP5	0.12695	0.00863743	0.0212069
RHOBTB1	0.00037115	0.995625	0.997005
SMC1A	-0.158908	0.00276527	0.00787194
HSD17B10	-0.371033	6.95362e-12	1.1887e-10
MARK2	-0.272351	1.06446e-10	1.49973e-09
HMMR	-0.697582	1.68643e-12	3.20518e-11
CHFR	-0.239452	2.1011e-08	1.98144e-07
TRHDE	1.27309	8.416e-12	1.4191e-10
P4HA2	-0.0635735	0.330038	0.445851
FCGR2B	0.180154	0.0608137	0.112068
NFATC3	0.434457	1.04866e-14	2.88827e-13
TRNT1	-0.0919265	0.040965	0.080431
ACADVL	-0.166996	0.0044997	0.0120318
STK10	0.415749	1.36518e-12	2.65634e-11
FBXW11	0.219968	1.06575e-06	7.0452e-06
ACAP1	0.30242	0.000356859	0.00130125
CRMP1	0.474412	9.89734e-08	8.15956e-07
EVC	0.397768	8.4706e-10	1.03093e-08
DERL2	-0.183759	1.43133e-05	7.40468e-05
SIDT1	-0.00219488	0.982009	0.987707
NDE1	-0.122215	0.0361309	0.0723019
IRAG1	0.737337	4.30144e-22	3.24306e-20
TMEM38A	-0.242858	0.00315249	0.00880754
AP1M1	0.0930387	0.0255036	0.053755
PVR	-0.254711	5.8472e-05	0.000262437
XRCC1	-0.163979	0.000598085	0.00205274
SCARB1	-0.418127	1.72139e-06	1.0861e-05
CYP2W1	0.0813511	0.684892	0.770084
MCM2	-0.50961	2.64533e-09	2.93826e-08
MOV10L1	-0.142003	0.284307	0.396745
PANX2	-0.554711	7.22977e-06	3.98912e-05
SELENOO	-0.152963	0.0136135	0.0314005
TP63	1.08976	3.35497e-10	4.35203e-09
ALPK1	0.0902197	0.0993429	0.168496
LLGL2	-0.234958	0.000821137	0.00271781
PDE8A	0.0580041	0.29718	0.410848
CLCN4	0.139706	0.113538	0.187996
NLE1	-0.259826	2.58403e-07	1.94856e-06
SDHA	-0.303166	1.84998e-08	1.76653e-07
SMARCE1	-0.0509726	0.183759	0.279206
FNDC8	-0.164776	0.171445	0.264154
GSDMB	-0.244935	0.00935813	0.0227368
KDM5A	0.0132977	0.795913	0.855962
ADAM11	-0.175174	0.126178	0.205187
PPP2R3A	-0.0204055	0.795654	0.855762
FERMT2	0.295674	4.66222e-07	3.3336e-06
ABCB11	0.0603535	0.747491	0.81912
DHRS9	0.172227	0.266666	0.377117
CD5L	0.82088	1.92942e-06	1.20438e-05
PTGS2	-0.537354	0.000686451	0.0023175
IGF2BP2	-0.186176	0.125955	0.20487
MAP3K13	-0.1389	0.00645799	0.0165052
ST6GAL1	0.148522	0.0539527	0.101297
TBX21	0.176594	0.120443	0.197408
FRY	0.670967	3.36387e-19	1.78933e-17
PICALM	-0.0406797	0.317168	0.432386
NSF	-0.132446	0.00224349	0.00656406
GLI2	0.520513	4.49958e-09	4.80222e-08
CLASP1	-0.0179662	0.668485	0.756998
MRPS34	-0.289167	5.33752e-07	3.76799e-06
NOTCH3	-0.0106782	0.892053	0.92501
CLNS1A	-0.268989	2.453e-10	3.24512e-09
PPP2R2C	-0.887418	3.63682e-05	0.000171934
TEAD2	-0.136405	0.0668072	0.121232
EED	-0.267516	3.4186e-10	4.42795e-09
CDHR2	-0.253849	0.15484	0.242956
SNCB	0.564644	0.000347376	0.00127116
TSG101	-0.135289	0.000937762	0.0030633
NCBP3	-0.0128887	0.799833	0.858956
ATP2A3	-0.363733	0.000885282	0.00290726
CA12	-0.784481	5.21866e-06	2.9754e-05
MGLL	0.298645	0.000467816	0.00165086
NTN4	0.4688	3.82144e-08	3.43707e-07
BCS1L	-0.278948	6.16469e-12	1.06263e-10
NUAK1	0.244467	0.00283642	0.00804216
DPP8	0.114735	0.00640813	0.0163965
SLC24A1	0.17913	0.000510724	0.00178369
ZNF532	0.0871741	0.132345	0.213341
SCARF1	0.670097	1.45846e-16	5.42258e-15
LMAN1	-0.219435	2.38895e-05	0.000117382
HACD3	-0.177346	0.00132678	0.00414996
IPCEF1	0.0759408	0.559741	0.666591
ZZEF1	0.235788	4.91775e-06	2.82003e-05
NOX3	-0.024214	0.952377
ENO1	-0.302083	8.35149e-07	5.66506e-06
SLC12A1	0.140503	0.459308	0.574791
MYDGF	-0.341298	3.3879e-08	3.08037e-07
ANO8	-0.264033	0.000274513	0.00102929
TUBE1	0.110266	0.0352068	0.0707368
ARHGEF10L	-0.0866884	0.16041	0.25021
TXK	0.611187	1.99701e-10	2.67783e-09
VEGFD	2.61813	4.18014e-77	1.13261e-73
KCNQ2	-1.22069	1.37159e-06	8.84708e-06
TACR2	-0.295549	0.00461741	0.0123075
ACTR6	-0.297997	1.30697e-10	1.81835e-09
TIPIN	-0.284165	6.09636e-08	5.24801e-07
SRI	-0.193608	0.00248023	0.0071677
EIF4G3	0.0148161	0.736806	0.810773
NUP37	-0.464644	6.19342e-18	2.81739e-16
SEMA3A	-0.0273781	0.851952	0.896539
GTSE1	-0.722517	2.73262e-14	7.00975e-13
SEMA3C	0.161735	0.108857	0.181611
TTC38	-0.00186774	0.972109	0.981254
ACAT1	-0.196603	0.0030338	0.00852097
GRAMD4	-0.525886	1.05284e-13	2.48869e-12
CELSR1	-0.0170685	0.809008	0.865502
WNT8B	-0.117996	0.348334	0.464818
ZNF638	-0.0339143	0.451254	0.567169
SLC25A40	-0.174569	0.000214061	0.000824373
TIMM21	-0.259631	2.03571e-09	2.31148e-08
ADD2	0.0985286	0.47458	0.588922
PRG4	2.54988	6.44917e-75	1.4715e-71
RASAL2	0.147265	0.0306834	0.0629377
VPS9D1	-0.317547	2.21387e-07	1.6924e-06
ZNF37A	-0.0255831	0.670369	0.758462
MARK3	-0.10398	0.00491658	0.0129886
SLC25A3	-0.243559	8.26665e-09	8.41455e-08
FNDC3B	-0.162994	0.00838245	0.020671
FOSL2	0.0140558	0.838956	0.886802
CACNG5	-0.293363	0.308973	0.42345
CACNG4	0.21182	0.23945	0.345883
FRYL	0.23258	0.000193436	0.000753647
TMEM131	0.00162671	0.969393	0.97949
FSCN1	-0.0220311	0.850247	0.895309
ACTB	-0.0151303	0.755632	0.825188
MOCOS	-0.325896	0.000134496	0.00054866
PLD1	-0.144568	0.0524019	0.0988438
ATP12A	0.352337	0.0953662	0.162823
WDR62	-0.615935	7.74459e-10	9.47892e-09
DLG1	-0.0674064	0.156096	0.244511
RAB7A	-0.134289	0.00100214	0.00325063
BCAP29	-0.118948	0.0230703	0.0493801
SEC31B	0.214193	0.0301487	0.0619964
SART3	-0.187316	7.09334e-08	6.03435e-07
ARHGAP15	0.57484	1.81947e-12	3.44144e-11
TUBA3D	-0.370662	3.15284e-05	0.000151046
PAX2	-0.673991	0.0112687	0.0266966
EXOSC7	-0.0932635	0.0298239	0.0614362
KIFAP3	0.061223	0.156788	0.245381
MKRN2	0.00699711	0.822933	0.875114
MCM6	-0.472639	2.08918e-12	3.91062e-11
REXO2	-0.141308	0.00123635	0.00390345
RBM7	-0.0833728	0.0575974	0.107033
RBMS2	0.350869	3.54259e-11	5.40009e-10
BAZ2A	-0.204351	2.84428e-05	0.000137541
PTPN23	-0.0731809	0.100963	0.170747
MLH1	0.00863622	0.795029	0.855238
UNG	-0.447573	6.19612e-16	2.09364e-14
FMO4	0.35005	2.12026e-06	1.31273e-05
KLHL20	0.20454	1.26545e-07	1.02047e-06
RGS11	0.073023	0.551984	0.659601
SLC46A1	0.0182219	0.755033	0.824738
PLXNA2	0.533988	5.01086e-09	5.29814e-08
SPAG5	-0.796626	5.57598e-19	2.87774e-17
ANKRD13A	0.0619694	0.197586	0.295776
TPD52	-0.7139	1.07747e-21	7.77215e-20
ACACB	0.403945	5.97505e-08	5.15238e-07
TRAF4	-0.384994	5.47855e-12	9.55374e-11
PAG1	0.204252	0.024282	0.0515461
GPATCH1	-0.235058	3.64712e-07	2.66179e-06
ICAM3	0.381414	4.16112e-05	0.00019377
NT5C2	0.016639	0.743801	0.816439
MCAM	0.394309	8.35359e-07	5.66533e-06
GPC4	0.17377	0.0678831	0.12286
MBNL3	0.383167	2.52779e-06	1.54019e-05
CAMSAP3	-0.257156	0.000245246	0.00093029
RAP1GAP	0.220109	0.0786672	0.138995
XAB2	-0.0404091	0.390077	0.507606
ARHGEF1	0.121881	0.0449725	0.0870534
STXBP2	-0.146668	0.00468779	0.0124624
MAP2K7	-0.0523795	0.224401	0.328079
NMRK2	0.283559	0.174848	0.268348
DGKD	0.0941282	0.180426	0.275243
CTTNBP2	0.60692	9.14416e-08	7.58404e-07
ACTL6B	-0.511985	0.015313	0.0347365
RARB	0.24648	0.00249313	0.00720019
TOP2B	0.108013	0.0126325	0.0294544
TM9SF3	0.0298428	0.542493	0.651112
NFKB2	-0.205431	0.000798424	0.00264911
UBE2T	-0.862193	2.02074e-22	1.59859e-20
PPP1R12B	0.403173	1.765e-06	1.11135e-05
DNAJC10	-0.335631	2.20045e-09	2.4797e-08
GTF3C1	-0.0135309	0.756197	0.82561
IL4R	0.0395774	0.454775	0.57037
USP33	-0.0166087	0.687027	0.771787
PAK3	-0.578504	0.00127458	0.00400437
CAPN6	1.01444	1.7979e-06	1.12978e-05
DCX	0.307952	0.22258	0.325857
SNRPA	-0.335653	1.69802e-13	3.84972e-12
SPAG6	1.4486	3.40066e-14	8.64159e-13
EXOSC5	-0.405632	8.69238e-09	8.82304e-08
DYNC1I2	-0.0619151	0.0923743	0.158542
APBB1IP	0.352597	7.66918e-06	4.19897e-05
LRCH4	-0.00796945	0.88756	0.922169
FAM76B	-0.065842	0.144411	0.229499
SIRT6	-0.229054	2.96133e-05	0.000142644
TYR	0.709087	0.0230167	0.0492726
POLD3	-0.204675	4.14786e-07	2.99647e-06
ADAMTS8	2.51145	4.53156e-103	9.82261e-99
CAPZB	0.01434	0.734907	0.809259
GPR137B	0.162107	0.0119748	0.0281235
NAALAD2	0.724671	2.31063e-16	8.31982e-15
JADE1	-0.221948	0.00251174	0.00724863
SLC25A43	-0.0787975	0.141252	0.225304
UBE2A	-0.050428	0.269493	0.380197
FGFR1	0.188414	0.0404785	0.0796742
FKBP6	0.0153889	0.913986	0.940698
SMC1B	-0.235747	0.187824	0.284256
FBLN1	0.857305	4.3745e-22	3.28671e-20
CAV3	2.44418	6.73309e-42	2.21131e-39
CST7	0.263592	0.0137515	0.0316697
MAP2	-0.134887	0.29202	0.405096
PIAS2	-0.100583	0.107164	0.179298
AMPH	-0.105266	0.500004	0.612962
ARAF	-0.0152941	0.737521	0.811271
MCCC1	0.0680923	0.28827	0.40092
LAMP3	0.983996	1.31042e-17	5.66961e-16
FAP	0.276084	0.00871958	0.0213771
NEBL	0.246083	0.00588765	0.0152419
ACER3	0.0718207	0.155735	0.244043
UBE2K	-0.249862	1.51467e-08	1.47162e-07
PIK3C3	0.141292	0.00491976	0.0129939
N4BP2	-0.0673326	0.351014	0.4675
TIGAR	-0.134233	0.00917801	0.0223456
TULP3	-0.179727	0.000116158	0.000482023
SYNJ2	-0.0581327	0.366771	0.483822
TMEM132C	2.43328	2.69383e-38	7.07775e-36
PPP2R5C	0.0168976	0.679332	0.765449
RBFOX1	0.167086	0.595221	0.696841
GNB1	-0.047765	0.206847	0.307054
HOXA9	-0.578543	5.40288e-05	0.000244494
EDN1	0.612677	4.62911e-09	4.92832e-08
MLLT10	-0.0264557	0.540291	0.649385
ZCWPW1	0.100404	0.163964	0.254662
ADCYAP1R1	1.17519	1.11151e-27	1.41308e-25
FGF20	-0.166846	0.364816	0.481959
P2RY10	0.518964	5.24419e-07	3.71056e-06
ITM2A	0.787576	5.54222e-22	4.09313e-20
NRDC	-0.240516	6.26848e-11	9.19944e-10
VDAC3	-0.276299	2.83173e-05	0.00013698
PCM1	-0.0132626	0.842539	0.889635
TNRC6C	0.213955	0.000619486	0.00211732
CBFA2T2	-0.187029	0.000518962	0.00180823
BRINP1	0.261027	0.261417	0.371104
ITCH	-0.0356182	0.425636	0.542439
PKD2L2	0.399645	0.00193037	0.0057722
TP53INP2	-0.261392	0.000560136	0.00193877
SDF4	-0.0975371	0.0502163	0.095402
MYH7B	-0.146218	0.169544	0.261746
SLC9A4	2.42688	2.01328e-17	8.46555e-16
TP73	0.315461	0.00217927	0.00639776
TOLLIP	-0.0431975	0.332913	0.449021
UBE2D4	-0.0657732	0.134245	0.215939
CLUL1	0.661886	8.10256e-07	5.50953e-06
RUNX1T1	0.988952	3.28215e-27	4.04227e-25
CDH17	-1.31945	2.68188e-09	2.97733e-08
THOC1	-0.199802	0.000115834	0.00048086
FKBP7	0.228519	6.61583e-05	0.000292663
OSBPL6	0.868806	1.99254e-15	6.28221e-14
SLC1A3	0.527104	5.9409e-08	5.12664e-07
XRCC5	-0.125656	0.000853493	0.00281416
LXN	0.142119	0.0356971	0.0715494
SP140	0.130017	0.173589	0.26685
MKNK1	0.0731646	0.0520219	0.0982723
TNS1	0.820187	1.90069e-30	3.00725e-28
REXO1	-0.139741	0.00536171	0.01401
SAR1A	-0.0393842	0.243759	0.350798
CDC14A	0.49293	8.71615e-13	1.75342e-11
RAPGEF3	0.220294	0.00929161	0.0225942
CEACAM1	-0.31901	0.000959067	0.00312474
SENP1	-0.222224	4.65355e-07	3.32851e-06
DUSP13	-1.18605	1.04244e-07	8.54286e-07
CIC	0.0687962	0.189971	0.286886
LIPE	-0.160138	0.0608889	0.112159
FDFT1	-0.127098	0.0679142	0.122896
PAFAH1B3	-0.626065	4.48331e-15	1.32545e-13
OPHN1	0.34435	1.08453e-05	5.77033e-05
AFM	-0.388745	0.160971	0.250922
KIF22	-0.396161	1.10623e-12	2.17493e-11
SCGN	-0.265644	0.316538	0.431717
CARMIL1	0.0312492	0.591338	0.693494
PGM1	-0.0954354	0.094181	0.161139
DDX1	-0.2083	1.63626e-07	1.28716e-06
DNM2	0.0758366	0.0738255	0.131859
EPB41L2	0.754222	1.12411e-29	1.722e-27
RIMS1	0.0551917	0.771583	0.837184
MOXD1	0.879089	6.5975e-24	5.92163e-22
STX7	0.252374	2.1864e-08	2.05607e-07
RABL2B	0.157402	0.00462512	0.012323
KEAP1	-0.135976	0.0119036	0.0279715
DDX43	0.070334	0.693289	0.776968
PTPRH	-0.605703	5.0725e-05	0.000231015
DCT	0.501816	0.000506032	0.00176816
SLC35C2	-0.187889	9.10157e-06	4.91678e-05
CRYBG3	0.00708443	0.939538	0.959124
EPHA6	-0.656598	0.00168639	0.00511965
SCTR	0.761231	7.4517e-06	4.09801e-05
RFX3	0.28545	0.000620408	0.00212029
RIF1	-0.0577061	0.314166	0.429171
RAB21	0.0846744	0.0633263	0.115905
SLC4A4	0.219533	0.0826069	0.144688
SMARCA2	0.473157	2.41113e-16	8.66009e-15
RDH8	-0.55424	0.0483297	0.0924458
SESN1	0.630394	8.53528e-26	9.13633e-24
MID2	0.160643	0.0176577	0.0393127
AGBL1	2.41675	1.33416e-25	1.3937e-23
COL5A3	0.264725	0.0128326	0.0298534
SRCAP	-0.105633	0.00422798	0.0113942
PUM3	-0.275658	2.54704e-07	1.92401e-06
GKN1	2.3744	3.1046e-07	2.30069e-06
CHRNA3	-0.525326	7.72204e-05	0.000336043
KCNN2	0.149719	0.14014	0.223786
CNOT4	-0.0296992	0.412304	0.529293
PSEN1	-0.0284694	0.419495	0.536258
CPOX	-0.296663	2.90352e-08	2.67247e-07
CLDND1	-0.182341	0.000222248	0.000852344
MOK	-0.0344767	0.634784	0.729351
HSP90AA1	-0.243619	1.1114e-05	5.89737e-05
RBL1	-0.30945	1.14173e-06	7.49376e-06
DLGAP4	-0.14159	0.00440035	0.0118032
IGSF9B	0.549522	0.000150311	0.000604256
CFHR2	-0.405289	0.874253
NDC80	-0.61624	1.44007e-09	1.68639e-08
AP4E1	0.0847556	0.0633485	0.115941
RSBN1	0.228056	7.72092e-07	5.27814e-06
MAGI3	0.321852	7.32278e-05	0.00032034
CXCL2	0.37214	0.00216913	0.006371
AADACL2	2.3583	7.10516e-13	1.45431e-11
COL4A4	0.614229	8.8093e-09	8.92917e-08
TCF7	0.414842	5.57554e-08	4.84002e-07
OSTM1	0.202194	7.83803e-05	0.000340612
CDH7	-0.292078	0.249055	0.356691
IMPG2	0.199269	0.0491051	0.0937097
PCNP	-0.0743354	0.0788894	0.139314
EXD2	-0.0728635	0.0655728	0.119326
ARG2	-0.475062	8.9472e-06	4.84485e-05
MEF2C	0.748905	2.19441e-22	1.72967e-20
PTPRC	0.576363	6.40604e-10	7.95289e-09
CACNA1S	0.899736	4.29721e-06	2.49155e-05
PKP1	0.152413	0.476732	0.59095
UBA5	-0.182756	3.30952e-06	1.96702e-05
STK17B	0.282831	5.99974e-06	3.36962e-05
CDC14B	0.127498	0.0229254	0.0491111
ZNF510	0.130561	0.00540467	0.0141096
LRP2	-0.309697	0.085404	0.148688
ZNF506	0.205369	0.00425884	0.0114655
JMJD4	-0.355697	1.20476e-13	2.80799e-12
DUSP12	-0.266323	4.30924e-11	6.46192e-10
AACS	-0.476099	4.8537e-17	1.9269e-15
DELE1	0.150381	0.000411409	0.00147412
SLC13A1	-0.856584	0.00906498	0.0221076
CADPS2	0.0869385	0.211556	0.312675
PCDHB4	0.520875	1.479e-09	1.72684e-08
PCDHA6	0.635032	0.00022865	0.000874034
PCDHGA2	-0.105789	0.406297	0.523456
HSPB11	-0.282845	1.54673e-08	1.49975e-07
PHLPP1	-0.188044	0.00375504	0.0102583
ATP8B1	-0.31963	9.25926e-05	0.000394504
IL12RB2	-0.486253	0.000265969	0.000999939
SMARCD3	0.0934807	0.258677	0.368027
WDR70	-0.106647	0.0204139	0.0445074
FYB1	0.404383	1.78227e-05	9.01051e-05
MPP4	0.190784	0.109448	0.182471
STRADB	-0.107595	0.069894	0.125921
BZW1	-0.327595	1.28629e-08	1.26562e-07
PGR	1.35675	6.89978e-40	2.02108e-37
C1QTNF3	0.443873	0.000113749	0.00047275
ME2	0.0844729	0.0890066	0.153828
C5orf22	-0.247763	1.01729e-06	6.7547e-06
CCNT2	-0.015989	0.72026	0.798014
FAM135A	0.0450367	0.52502	0.636039
COL19A1	1.1664	2.72497e-13	5.9966e-12
EPB41L3	0.435488	2.44753e-06	1.49591e-05
COBLL1	0.229613	0.00175332	0.00530315
DLG3	-0.211016	8.78592e-06	4.76526e-05
KCNK2	0.6898	0.000353178	0.00128967
SERTAD4	0.101514	0.341193	0.457513
TRAF5	-0.0381786	0.607649	0.70725
MRPL22	-0.292661	1.91087e-08	1.81986e-07
GEMIN5	-0.0160144	0.716481	0.795108
OPRK1	-0.255234	0.312474	0.427237
NFE2L1	-0.0224907	0.627106	0.723309
SEMA5B	-0.492341	4.37776e-05	0.000202631
GSK3B	-0.0363289	0.400123	0.517393
ITGB5	0.177367	0.00535354	0.0139936
ERC1	0.086418	0.129199	0.209229
XPO1	-0.200415	5.36705e-07	3.78698e-06
RNF13	0.0619238	0.180668	0.275553
TRPM3	0.648229	2.78852e-06	1.68297e-05
PALB2	-0.120019	0.00245597	0.00710566
DOP1A	0.322501	1.23376e-07	9.98246e-07
LYRM2	0.00798883	0.854583	0.898479
BCKDHB	0.0466254	0.360921	0.47792
KAT6A	0.126213	0.0373387	0.0743925
TUT7	0.0691456	0.191991	0.289221
ULK2	0.180832	0.00117008	0.00371968
GRHL2	-0.324	7.1968e-08	6.11157e-07
TNPO1	0.0162032	0.755203	0.824861
PLOD1	-0.0551805	0.365519	0.482656
P2RX5	0.234872	0.0406014	0.079869
ITGAE	-0.127705	0.0398844	0.0786799
DIS3	-0.00171598	0.967553	0.978249
PIBF1	0.127116	0.0135577	0.0312919
TDRD3	0.268865	3.60258e-08	3.25441e-07
NUFIP1	-0.133038	0.00166665	0.00506752
PDS5B	0.117092	0.0162788	0.0366342
OXCT1	0.0224037	0.814297	0.8693
RRAGB	0.0854608	0.0418099	0.0818045
EPYC	-0.16883	0.451784	0.567686
CYLD	0.325305	4.55493e-10	5.78908e-09
SLC27A5	-0.52379	1.20331e-11	1.985e-10
ZNF324	0.0166442	0.681914	0.767594
ZNF671	0.336838	1.34311e-06	8.68275e-06
ZNF416	0.0322726	0.525112	0.636123
ZNF586	0.0647447	0.241468	0.348229
ZNF446	-0.107823	0.0192918	0.0423741
ZNF264	0.250933	4.74815e-06	2.73072e-05
RPS5	-0.275903	0.00073675	0.00246529
FAT1	-0.131913	0.174042	0.267436
YTHDC1	-0.0240161	0.386461	0.504069
CHMP2B	-0.11642	0.0138083	0.0317838
SMAP2	0.205026	9.61111e-05	0.00040814
PPIE	-0.166911	8.38888e-05	0.000361254
ZMPSTE24	-0.0978929	0.0264766	0.0554955
STARD7	-0.12551	0.000290975	0.00108473
NOA1	-0.127937	0.00288813	0.00816419
REST	0.0517647	0.281808	0.393994
HAL	-1.31236	4.20944e-16	1.44831e-14
SSH1	0.0889904	0.0765109	0.135872
GSTP1	-0.433331	5.02219e-08	4.40199e-07
APLP2	0.158479	0.0126632	0.0295164
FAM234B	0.13053	0.0751806	0.133915
SLCO1A2	0.0348	0.882335	0.918171
WBP11	-0.19821	2.70601e-05	0.000131352
EIF3I	-0.201355	5.33496e-05	0.000241648
NKAIN1	-0.529222	0.00347773	0.00960357
COL16A1	0.409728	9.88162e-07	6.58855e-06
TXLNA	-0.059388	0.0798707	0.140709
APOB	-0.384872	0.0472525	0.0907135
NCOA1	0.11047	0.0312521	0.0639438
AGBL5	-0.207713	1.73505e-05	8.79332e-05
EFR3B	0.104346	0.390633	0.508139
KIF3C	-0.353799	0.00038161	0.00138047
RAB10	-0.3274	6.32971e-12	1.08978e-10
GCKR	-0.57249	0.00127861	0.00401493
HADHA	-0.0711243	0.0485995	0.0928757
MAPRE3	0.0288236	0.669133	0.757494
CAD	-0.33505	5.70294e-08	4.93481e-07
CD59	0.320465	7.48603e-06	4.1148e-05
CD82	0.330228	4.26441e-05	0.000197892
BCORL1	-0.0606025	0.321974	0.437397
ATRX	0.215115	0.000200455	0.000778187
AK6	-0.143274	0.000209675	0.000809642
FCN1	0.718417	7.70189e-10	9.43465e-09
MYNN	-0.140698	0.00388893	0.010582
MECOM	0.206767	0.0472204	0.0906597
SCAMP1	0.0328416	0.531249	0.641614
PREP	0.087457	0.0384352	0.0762059
HACE1	0.147274	0.00974773	0.0235554
SEH1L	-0.182527	0.000371693	0.00134876
WDR47	0.239798	3.86352e-08	3.47204e-07
WDFY1	0.0656086	0.144764	0.229976
OVGP1	0.0335366	0.746696	0.818601
SLC25A24	0.0787701	0.198295	0.296646
MAP3K4	0.178709	2.55266e-05	0.000124621
PILRA	0.490606	4.83404e-09	5.11884e-08
IGSF9	-0.297773	0.00391744	0.0106482
ABCB1	0.507297	5.35301e-07	3.77769e-06
ZNF213	-0.0592577	0.274685	0.386039
AKR1B1	-0.324049	0.00294343	0.00830159
CPNE3	-0.0297933	0.572389	0.677114
RRN3	-0.0631102	0.106916	0.178958
CTTN	-0.244053	1.28193e-06	8.32696e-06
WNT11	0.414097	0.00195743	0.00584062
MTIF2	-0.239422	3.49707e-10	4.52552e-09
DDHD2	-0.0651059	0.310385	0.424983
TTC39A	-0.342115	0.000163222	0.000649413
EPS15	0.152269	3.58554e-05	0.000169862
ORC1	-0.749594	3.15088e-15	9.56563e-14
MGST2	-0.0624984	0.271466	0.38243
CHERP	-0.140109	0.00348804	0.00962899
ATG16L1	-0.184522	1.15969e-06	7.60241e-06
USP40	-0.120926	0.0090858	0.0221534
POMGNT1	-0.114109	0.0138642	0.0318956
RAD54L	-0.814287	3.89501e-17	1.57222e-15
MAST2	-0.317033	2.03175e-09	2.30759e-08
DNAJA1	-0.221578	2.59458e-06	1.5769e-05
B4GALT1	-0.423412	9.06507e-13	1.81855e-11
CHMP5	-0.215596	4.02788e-05	0.000188347
NFX1	-0.11699	0.00359991	0.00988117
AQP6	-0.639849	0.000530194	0.00184352
DIMT1	0.0143267	0.731838	0.806944
IPO11	0.124081	0.0109037	0.0259438
FOLH1	-0.17491	0.102925	0.173449
EIF2AK1	-0.298157	6.09621e-12	1.0525e-10
NME8	0.194607	0.0605748	0.111689
EPDR1	0.414448	4.61174e-05	0.000212418
SNX10	-0.0190402	0.825931	0.877363
SEPHS1	-0.265182	2.93793e-11	4.54388e-10
MRPL28	-0.225826	7.75659e-05	0.000337411
HBQ1	-0.804567	0.00032754	0.00120601
ITPKC	-0.0941074	0.173076	0.266201
CEACAM6	0.132404	0.320471	0.435903
FAT2	0.535606	0.00496109	0.0130903
RBM22	0.0167324	0.580235	0.683988
TMED2	-0.458238	8.96286e-19	4.48681e-17
ERO1B	-0.325058	0.00741702	0.0185949
ZFAND6	-0.0448277	0.311122	0.425791
HSD17B2	0.242893	0.232	0.3372
TXLNG	0.00277887	0.951041	0.967026
PPEF1	-0.425895	0.000518567	0.00180729
LAT2	0.253511	0.00104785	0.00337669
HUWE1	-0.124796	0.0156746	0.0354382
ZW10	-0.11279	0.00835992	0.0206248
ALG9	-0.451824	6.9109e-11	1.00649e-09
MYBPC2	0.52309	0.000108645	0.000454632
NOX4	0.17544	0.077853	0.137854
ACOX3	-0.101684	0.0419824	0.0820969
MTMR2	-0.112755	0.0284202	0.0589424
PPP1R15A	0.336039	2.95632e-07	2.20286e-06
HSD17B14	-0.284579	0.00612955	0.0157871
TRIP6	-0.159078	0.0471577	0.0905627
ACHE	-0.741758	1.5073e-06	9.62223e-06
FTL	-0.0231635	0.782568	0.845748
SRRT	-0.355499	1.04575e-16	3.96981e-15
BAX	-0.141826	0.00623981	0.0160263
NLK	-0.139138	0.000500837	0.00175226
PIGS	-0.000269631	0.995554	0.996956
ADAMTS2	0.318626	0.00100114	0.00324763
TMPRSS11E	-0.596913	0.00449327	0.0120183
ATXN7L3	-0.230326	5.03348e-09	5.31834e-08
PGS1	-0.00731187	0.871195	0.910161
PSMC5	-0.249964	6.62981e-09	6.85792e-08
UIMC1	-0.0185558	0.602877	0.703449
CETP	0.522744	1.06267e-13	2.5092e-12
MMP2	0.555366	3.24511e-09	3.55168e-08
MT3	-0.172795	0.349422	0.465939
LPCAT2	0.31677	9.55663e-06	5.14465e-05
GNAO1	0.559245	4.68289e-07	3.34607e-06
OGFOD1	-0.065147	0.0672797	0.121936
SH3BP2	-0.115309	0.0298505	0.0614735
NOP14	-0.199018	3.17301e-06	1.89445e-05
ADD1	0.138687	1.78719e-05	9.03221e-05
L2HGDH	-0.358584	1.71677e-10	2.33016e-09
TXNDC16	-0.0436736	0.540032	0.649255
RTRAF	-0.287409	6.13485e-11	9.01247e-10
NID2	0.220543	0.0310507	0.0635767
GMCL1	-0.180648	1.07757e-05	5.7368e-05
SF3B2	-0.211464	9.67026e-09	9.73131e-08
KLHL42	-0.0120846	0.834581	0.88378
GNAS	-0.288218	3.44824e-07	2.52984e-06
DNM1L	-0.224574	2.6206e-05	0.000127564
PTHLH	-0.410091	0.0128377	0.0298621
PHACTR3	0.310002	0.0932611	0.15983
ERGIC2	-0.304596	1.30038e-08	1.27832e-07
TFAP2C	-0.343598	0.000105162	0.000441676
AURKA	-0.930319	4.14306e-23	3.43422e-21
CASS4	1.16052	6.54272e-55	4.11072e-52
PIR	-0.670077	1.57842e-09	1.83452e-08
AAMDC	-0.0639943	0.241848	0.34864
RFX2	0.470884	9.88515e-10	1.19006e-08
METTL2A	-0.295129	2.79047e-11	4.33593e-10
SULT2B1	-0.760525	1.8875e-09	2.16016e-08
ALG6	-0.202044	4.66686e-06	2.68861e-05
CNOT3	-0.258257	3.0249e-08	2.77242e-07
GP6	0.327931	0.0179488	0.0398707
PTPN4	0.231697	0.00026031	0.000981058
DDX18	-0.152915	8.21299e-05	0.000354772
KHSRP	-0.151909	0.000830001	0.00274443
GNA11	0.0573709	0.214215	0.31585
ASAP3	0.0783838	0.300656	0.414754
EDEM2	-0.139755	0.00479802	0.0127142
DNMT3B	-0.698127	1.87928e-11	3.00076e-10
REM1	1.00461	1.55202e-40	4.70513e-38
TPX2	-0.766227	1.85268e-12	3.50272e-11
PDRG1	-0.4192	1.12184e-13	2.63172e-12
EPB41L1	0.117544	0.0522868	0.0986568
SLC15A1	-0.778173	0.000146477	0.000590984
DOCK9	0.311937	9.24269e-06	4.9868e-05
ANKRD10	0.0090426	0.885808	0.920911
TGDS	-0.122462	0.0203333	0.0443539
DOCK3	0.00812879	0.950465	0.966585
C3orf18	0.141064	0.0219869	0.0474099
COQ9	-0.351936	3.16114e-13	6.85552e-12
TMEM40	-0.0654586	0.666155	0.75513
KIF9	0.0974493	0.090297	0.155692
ARHGAP28	0.653576	1.59081e-12	3.04212e-11
CRLS1	0.0410702	0.54498	0.653337
DEFB127	0.125842	0.929479
PPP1R13B	-0.0578294	0.408856	0.526019
ATRN	0.0910499	0.0762892	0.135539
SMOX	-0.629769	3.08838e-10	4.02791e-09
SIGLEC1	0.830901	1.12677e-16	4.25873e-15
FKBP1A	-0.0151807	0.705783	0.786633
NSFL1C	-0.121616	0.00349341	0.00963951
SLC4A11	-0.398194	0.00296587	0.00835401
C20orf194	0.533079	2.90414e-23	2.45899e-21
ZNF343	-0.0621672	0.16915	0.261249
EBF4	0.208768	0.0270498	0.0565371
CPXM1	0.672253	1.53706e-09	1.79077e-08
MAVS	-0.0271633	0.564566	0.6707
LZTS3	-0.304075	0.00014457	0.000584156
HTR3C	2.34503	1.53464e-26	1.74619e-24
XRN2	-0.0163754	0.712761	0.792075
KIZ	0.130303	0.00591706	0.0153108
DYNLL1	-0.32685	2.36808e-12	4.39097e-11
TESC	-0.85587	1.30088e-06	8.44121e-06
SNX5	-0.0890294	0.0302125	0.0621099
RPL6	-0.281369	6.56556e-08	5.61622e-07
SIRPG	0.0508461	0.626003	0.722402
MAPKAPK5	-0.278962	9.17289e-16	3.01032e-14
P2RX7	0.455223	3.12397e-07	2.3115e-06
ESF1	-0.164113	0.00149641	0.00460939
RBBP9	0.140804	0.00796203	0.0197805
ANAPC5	-0.269437	2.6207e-13	5.78476e-12
SLC23A2	-0.0763113	0.209203	0.309895
SLC8B1	-0.211358	1.43065e-05	7.402e-05
TMEM230	-0.155774	0.000847956	0.00279782
DZANK1	0.137736	0.0243174	0.0516036
KDM2B	-0.0535804	0.17811	0.27238
ECRG4	2.33717	5.59144e-47	2.37647e-44
LHX5	-0.990468	9.2965e-05	0.000395896
TASP1	0.0246346	0.588191	0.690831
OAS1	-0.471467	1.11338e-06	7.32428e-06
GCN1	-0.335555	2.48628e-12	4.59247e-11
RPLP0	-0.493542	3.65687e-13	7.83651e-12
PXN	-0.0292124	0.627454	0.723556
SIRT4	-0.179029	0.00677328	0.0172008
RPH3A	0.538456	0.000166632	0.000661582
KIF16B	0.164337	0.00363496	0.00996538
TRMT6	-0.265389	3.36357e-07	2.47274e-06
CHGB	-1.32051	4.5181e-08	3.99671e-07
PEBP1	-0.0746475	0.183664	0.279101
TBX5	1.0514	1.23321e-43	4.45519e-41
BRAP	-0.234312	1.72681e-13	3.91121e-12
ERP29	-0.356465	1.04609e-08	1.04734e-07
NOS1	0.0882982	0.650724	0.74212
FUS	-0.163304	5.69328e-05	0.000256245
IGBP1	-0.0466663	0.343046	0.459444
FXYD5	0.0604618	0.48977	0.603454
ZNF302	0.0286008	0.585098	0.68813
GRAMD1A	-0.295921	1.89111e-05	9.50312e-05
FXYD3	-0.411859	0.00306016	0.0085861
HEPH	0.318274	0.0011437	0.00364679
CDIP1	0.232959	0.000310003	0.00114777
CMTM1	0.0572092	0.421556	0.538518
KCNH4	0.0403401	0.713464	0.792673
GANAB	-0.203512	5.44119e-06	3.09116e-05
GMIP	0.173029	0.00021387	0.000823931
RBM41	0.00162955	0.974995	0.983297
BIRC5	-0.766085	2.61259e-12	4.81347e-11
LAG3	-0.394208	0.000668043	0.00226223
MLF2	-0.356382	4.0579e-10	5.19545e-09
OTUB2	-0.339454	7.18533e-06	3.96611e-05
DDX24	0.0611735	0.103037	0.173573
ZBTB25	-0.0115139	0.835916	0.884739
NECAP1	-0.189451	1.30046e-05	6.79168e-05
ARHGAP4	-0.117352	0.155318	0.243547
ANKRD24	-0.105662	0.356969	0.473772
DHX32	-0.144656	0.0111658	0.0264845
RCOR1	-0.0585965	0.261125	0.37078
GPATCH2L	0.102689	0.0828315	0.145017
LTBP4	0.788662	8.11382e-23	6.56251e-21
BLVRB	-0.377698	2.37102e-05	0.00011658
SLC9A1	0.112646	0.110302	0.183618
SPTLC1	-0.0466491	0.274944	0.386315
PAPOLA	-0.274112	4.9409e-10	6.23985e-09
CCNK	-0.108927	0.0249291	0.052744
PCBP4	-0.248702	3.66676e-05	0.000173255
RGS1	0.379453	0.000474799	0.00167169
YPEL3	-0.0740864	0.269061	0.379722
MRPS33	-0.396708	7.55281e-12	1.28102e-10
NDUFB2	-0.268197	1.28077e-06	8.32066e-06
NUDC	-0.100037	0.0468632	0.0900938
MAEA	-0.219871	1.0706e-08	1.06917e-07
ICAM1	0.142	0.15611	0.244524
STRN4	-0.233391	1.71328e-06	1.08114e-05
IRAK3	0.21593	0.0517351	0.097803
LYZ	0.779111	4.64061e-10	5.8859e-09
SI	0.0702407	0.884101	0.919523
MUL1	0.106888	0.0165677	0.0371915
TFAP4	-0.25327	5.12121e-07	3.63066e-06
PDCD7	-0.0498733	0.0914784	0.157309
SPG21	-0.0832576	0.0192322	0.0422626
FETUB	-0.220075	0.352902	0.469539
DNAJB11	-0.380003	4.34898e-17	1.73767e-15
P3H2	0.911749	2.2092e-11	3.49155e-10
THPO	-1.3037	2.30911e-14	6.01951e-13
CHRD	-0.681629	8.23771e-08	6.89956e-07
FLT3LG	0.156786	0.0235989	0.0503078
RAB11FIP3	0.0828555	0.164596	0.255462
GNPTG	0.00293317	0.957684	0.971647
ZNF268	-0.00640536	0.894239	0.92651
GOLGA3	-0.214883	1.22621e-05	6.44037e-05
PABPC4	-0.173825	8.47597e-05	0.000364606
CD209	0.71664	3.15502e-11	4.85194e-10
CERS4	-0.164046	0.099044	0.168093
MCOLN1	0.246553	2.0096e-06	1.24921e-05
USP48	0.0672997	0.0768433	0.136361
EFNB1	0.404574	1.36698e-05	7.10483e-05
PDPR	0.255167	3.34041e-06	1.98348e-05
AARS1	-0.215146	4.14952e-05	0.000193368
GLG1	0.0375174	0.387117	0.504777
KIF4A	-0.783795	3.55587e-14	9.00959e-13
TNRC6A	0.0763548	0.124489	0.202919
PLEKHG2	-0.397619	1.51338e-05	7.79258e-05
AGTR2	2.32252	8.62397e-28	1.10611e-25
NAT14	-0.223786	0.00208735	0.00616464
PITPNM2	-0.207263	0.00350207	0.00965814
EXOC1	-0.0949846	0.012461	0.02911
RBM27	-0.0104314	0.789224	0.850767
POU4F3	0.0688301	0.668454	0.756993
OSBPL8	0.151479	0.00917429	0.022339
DTX2	-0.307417	2.75925e-05	0.0001337
NLRC4	0.597788	4.87901e-15	1.42819e-13
PUS7	-0.447172	4.71696e-15	1.39014e-13
LAMB4	0.547341	1.39763e-06	9.0043e-06
NRCAM	0.0766137	0.596492	0.697908
LAMB1	0.379895	6.06711e-07	4.24159e-06
SLC26A4	-1.42576	1.51174e-14	4.04548e-13
SLC26A3	0.662378	0.000497295	0.00174156
DLD	-0.231641	8.52053e-07	5.76619e-06
WDR7	0.250326	2.93927e-07	2.19166e-06
TXNL1	-0.232335	5.83598e-06	3.28915e-05
GRIA1	2.32137	3.35523e-47	1.44016e-44
ABCC6	0.262395	0.00704954	0.017822
CMTM6	0.0543072	0.238245	0.344471
ITGA6	0.233695	0.0404004	0.0795458
RAPGEF4	0.452952	3.42263e-08	3.10934e-07
MAP3K20	0.0618667	0.352999	0.469617
SMPX	-0.183595	0.339766	0.455957
FH	-0.304017	1.03556e-10	1.46423e-09
SEL1L3	-0.0178449	0.762804	0.830818
LYPD2	2.28725	8.98783e-26	9.59705e-24
CDV3	-0.0689949	0.115538	0.190826
MYO15A	-0.0754623	0.404623	0.521827
ALKBH5	-0.0631609	0.106807	0.178824
APOH	0.347796	0.0722275	0.129421
NLRP1	0.367624	1.4555e-05	7.51624e-05
PITPNM3	0.357398	2.43374e-05	0.00011942
SPAG7	-0.00707602	0.895392	0.927338
ORC6	-0.753802	6.34074e-18	2.88138e-16
ZFHX4	-3.37748e-05	0.999826	0.999849
SLC17A6	0.114272	0.859111	0.90154
CPA1	0.490153	0.0138579	0.0318846
ZC3HC1	-0.357364	4.51512e-18	2.09796e-16
ESR1	0.113076	0.417682	0.534582
RGS17	-0.375254	0.00299197	0.00842203
ANGPT2	-0.0741267	0.495263	0.608564
TMEM101	-0.166953	0.00345653	0.0095505
CD200	0.496837	1.38334e-12	2.68501e-11
CCDC80	0.725846	5.1739e-13	1.08567e-11
C7	2.26711	8.62586e-77	2.1997e-73
PSME1	-0.201172	0.0005111	0.00178475
PPP2R3C	-0.215886	0.000333823	0.00122706
HAUS4	-0.141323	0.0151484	0.0344243
JPH4	0.927404	7.18616e-24	6.42339e-22
MYH7	-0.0979512	0.615614	0.714215
CEBPE	0.0613538	0.624583	0.721324
SLC7A8	-0.087514	0.44895	0.564813
OSGEP	-0.144328	0.0021657	0.00636283
SLC22A17	0.318428	0.00205402	0.00608237
RNF31	-0.107446	0.0161467	0.0363765
SCFD1	-0.344599	6.8775e-14	1.6722e-12
G2E3	-0.407714	9.34558e-09	9.42866e-08
HECTD1	-0.118144	0.0263709	0.0553195
HNRNPC	-0.265431	2.69874e-12	4.95115e-11
RPGRIP1	-0.311487	1.24015e-05	6.50962e-05
SUPT16H	-0.2416	2.80434e-07	2.09791e-06
TOX4	-0.122079	0.000308289	0.00114252
GEMIN2	-0.53045	4.14875e-13	8.82949e-12
TGM1	0.294696	0.00144101	0.00445677
TINF2	-0.0234676	0.544595	0.652984
DAZL	-0.0972066	0.601266	0.702041
TBL1Y	-0.27363	0.452055	0.567912
SEMA6A	0.569657	5.28351e-09	5.55544e-08
TRPM7	0.170501	0.00178452	0.00538571
TYRO3	0.181172	0.0292023	0.0603451
WDR76	-0.323824	6.97688e-06	3.86371e-05
CAPN3	0.849955	3.65066e-13	7.83094e-12
SNAP23	0.116392	0.00291161	0.00822414
TBX15	-1.04109	1.41045e-12	2.73094e-11
PHGDH	-0.500215	0.000145762	0.000588312
COL9A3	-0.322267	0.0102018	0.0244793
EZR	0.149899	0.0185133	0.0409213
MYL6	-0.105732	0.0754719	0.134328
AGO1	0.0552352	0.223443	0.326944
TEKT2	0.915441	1.30388e-08	1.28118e-07
CLSPN	-0.532387	3.08987e-07	2.29095e-06
RFFL	-0.121172	0.0169186	0.0378577
UNC13D	0.0443576	0.657247	0.747473
MFSD11	-0.129229	0.00205062	0.00607312
DPYSL2	0.671383	9.73667e-22	7.07042e-20
TGFB2	0.798852	9.42581e-12	1.5826e-10
GPATCH2	-0.0583215	0.25299	0.361276
NUP50	-0.0795128	0.0541918	0.10169
CDC45	-0.868343	1.99757e-18	9.62207e-17
COMT	-0.130657	0.0435102	0.0846219
ADA2	0.451768	1.54238e-08	1.49586e-07
VNN3	0.0534944	0.743512	0.816143
ECHDC1	0.301439	1.70343e-07	1.33393e-06
LRRFIP2	0.0493027	0.208197	0.308689
SEC22C	0.114748	0.000233861	0.000892147
XYLB	-0.335545	9.41881e-07	6.3102e-06
HDAC6	-0.0349195	0.486364	0.600366
OR1I1	-0.0705473	0.912348
GABRP	0.562964	0.00854333	0.0210127
KRT31	0.691152	0.0175988	0.0391957
CDC6	-0.747704	6.45329e-14	1.58058e-12
UPRT	0.113286	0.00723171	0.0182114
CDC23	-0.0792025	0.014856	0.0338522
AAAS	-0.297924	1.06957e-12	2.10669e-11
CBX5	-0.165564	0.00555124	0.0144522
FMO2	1.48774	3.05421e-57	2.24417e-54
SUCO	-0.108697	0.0272231	0.0568485
[truncated: 17,578 more rows]

## Sheet: Sheet3
gene_name	log2FoldChange
CD300LG	3.30359
SFTPC	3.2457
SLC6A4	3.15953
LGI3	3.01377
VGLL2	2.87474
ADH1B	2.81557
CLDN18	2.79418
ADRA1A	2.76638
AGER	2.72751
ADGRG4	2.71977
TFF2	2.69826
SCGB1A1	2.68922
SEC14L3	2.67585
CGB5	2.67419
ANGPTL7	2.66823
FABP4	2.64353
KCNA4	2.64078
VEGFD	2.61813
PRG4	2.54988
ADAMTS8	2.51145
CAV3	2.44418
TMEM132C	2.43328
SLC9A4	2.42688
AGBL1	2.41675
GKN1	2.3744
AADACL2	2.3583
HTR3C	2.34503
ECRG4	2.33717
AGTR2	2.32252
GRIA1	2.32137
LYPD2	2.28725
C7	2.26711
INMT-MINDY4	2.22637
UBQLN3	2.19679
MYOCD	2.19274
MYOC	2.19216
MUCL3	2.18786
HPSE2	2.1876
ABCA8	2.16673
INMT	2.16575
FGF10	2.16045
DES	2.15573
OTC	2.1471
C1orf141	2.13903
RSPO2	2.13655
ALKAL2	2.13348
TCF21	2.12725
OSTN	2.10618
C1orf87	2.10279
DNAH9	2.0979
MAS1L	2.0953
PTPRQ	2.08684
GPM6A	2.07605
CHRM1	2.07501
MIA	2.0747
GPIHBP1	2.07178
ASTN1	2.0489
LRRC74B	2.046
CA4	2.04278
ERICH3	2.02015
DLK1	2.01763
CASQ2	2.01319
FAM216B	2.00731
ROBO2	2.00145
CHRDL1	1.99637
PI16	1.99386
CHRM2	1.99357
ADGB	1.99341
VWC2	1.99117
OR52H1	1.98596
C1QTNF7	1.98437
CMA1	1.9835
OGN	1.98081
CHRNA2	1.97271
ATP1A2	1.97173
CALN1	1.96951
SERTM1	1.96473
VWA3A	1.96344
ITLN2	1.96143
TNXB	1.93973
ARMH2	1.93222
MAMDC2	1.93044
FAM107A	1.92871
TMEM212	1.92277
COL6A6	1.91074
C11orf88	1.90773
PTPRT	1.90583
SGCG	1.90258
SCN7A	1.89899
CNTN6	1.89841
CEACAM8	1.89833
TSPAN19	1.897
TEKT1	1.88723
PCDH11X	1.88647
CYP2F1	1.88561
C6orf118	1.88226
TENM2	1.88072
BTNL9	1.8791
CCL14	1.87391
GDF10	1.87328
SERTM2	1.86712
PRB4	1.85439
GFRA1	1.85316
DNAI2	1.85301
C11orf97	1.85241
LMNTD1	1.84325
ADH1A	1.83918
MYL1	1.82906
CDHR4	1.82731
REG4	1.82118
PRSS33	1.81998
WFDC5	1.81779
MFAP4	1.81725
SPATS1	1.8161
C20orf85	1.80898
OR52B6	1.8077
LRRC71	1.80765
SLIT3	1.80369
RSPO1	1.80145
SOSTDC1	1.79625
SCGB3A1	1.79285
AMELX	1.79108
PCDH15	1.78895
ITIH5	1.78414
OR1L4	1.78345
C9orf24	1.78056
RS1	1.77587
TNR	1.77148
FOSB	1.76524
CYP1A2	1.76179
DNAAF6	1.75907
ANKRD66	1.75326
MACROD2	1.75284
ART4	1.75087
ECT2L	1.74986
FRMPD4	1.7475
TEX26	1.74522
MROH9	1.74494
C1orf158	1.74109
EFCAB1	1.74102
RXFP2	1.74032
F11	1.73238
CTSG	1.7287
CFAP77	1.72779
AC010255.3	1.72555
CNTFR	1.72348
TMEM100	1.72081
ASPA	1.71962
DTHD1	1.7186
CATSPERD	1.71462
WFDC6	1.71226
CFAP100	1.71134
LCN6	1.7067
FOXL3	1.70339
CHST9	1.70216
TCTE1	1.6989
C22orf15	1.69853
SULT1C3	1.69689
SH3GL3	1.69012
KIAA2012	1.68973
APOBEC4	1.68804
CFAP65	1.68698
CFAP52	1.68502
MC5R	1.68425
GYPB	1.68343
STOML3	1.68336
CLCA2	1.67962
WDR38	1.67821
ELANE	1.67806
SERPINB10	1.678
PABPC1L2B	1.67383
TTC29	1.66989
MYH2	1.66836
SERPINB13	1.66291
ZBBX	1.65884
SCN4B	1.65741
ANGPTL5	1.65583
AKAP14	1.65544
RBP2	1.65246
ACTN2	1.65131
C6	1.65053
ITLN1	1.65038
GADL1	1.64814
DNASE1L3	1.64804
KRT5	1.64783
NRG3	1.6466
PEBP4	1.64449
LEFTY2	1.63734
TRIM71	1.63665
FREM3	1.63074
LRRC18	1.62908
MORN5	1.62905
DNAH12	1.62369
CPB2	1.6227
UNC45B	1.62131
ITGA8	1.6196
SNTN	1.61424
TUBA4B	1.61279
DNAI1	1.61081
CMTM5	1.60981
CCDC179	1.60584
FSHR	1.60425
NTRK3	1.60304
REG3A	1.60111
OVCH1	1.59942
PENK	1.59833
CYP4B1	1.59784
KCNE1B	1.59695
CFAP47	1.59578
RSPH4A	1.59442
FHL5	1.5906
C14orf180	1.58907
CTXND1	1.58663
SCGB3A2	1.5856
ACKR1	1.58546
MUSK	1.58502
ADCY2	1.58378
AC007906.2	1.58294
CBLN4	1.58214
TTLL10	1.58153
ZNF536	1.58117
AADAC	1.57967
OR52D1	1.57886
OR5P2	1.57704
PNMA8C	1.57597
HAND2	1.57461
SPHKAP	1.57279
NWD1	1.57136
TAS2R50	1.57052
PLP1	1.56856
NTRK2	1.5654
CHIA	1.56499
FOXI2	1.56495
TCP11X2	1.56411
MAB21L1	1.56068
GRM7	1.55957
CFAP46	1.55877
CYP1A1	1.55827
MAP3K19	1.5578
CIBAR2	1.55757
C1orf189	1.55591
PZP	1.55528
SVEP1	1.55369
TMEM232	1.55165
LUZP2	1.54894
TMEM196	1.54465
DNAAF1	1.54379
AQP10	1.54203
PLPPR4	1.5412
ABI3BP	1.54068
CFAP61	1.53972
KCNA5	1.53943
FCN3	1.53074
TTLL9	1.53041
PAK5	1.52996
MYH11	1.52865
SFRP5	1.52538
MMRN1	1.52525
GFI1B	1.52425
CWH43	1.52315
ERVFRD-1	1.51751
RGS22	1.51749
WSCD2	1.51562
CFAP73	1.51558
IL5RA	1.51518
CLIC5	1.51464
MEOX2	1.51462
OMG	1.50904
HS3ST4	1.50875
HYDIN	1.50784
SYNPR	1.50565
GFRA2	1.50407
WIF1	1.50115
GAST	-1.50239
SMKR1	-1.50403
FOXN4	-1.5048
NPPB	-1.50839
NLRP11	-1.50855
CASP14	-1.51381
PAX4	-1.51563
DMRTC2	-1.52473
CELF3	-1.52491
F7	-1.53133
NBPF6	-1.53396
LYPD4	-1.53654
GLDC	-1.53947
RETNLB	-1.54331
PSG3	-1.54346
PAEP	-1.54818
UGT1A10	-1.54932
MYT1	-1.55995
LHX8	-1.56127
CALY	-1.56162
GAL	-1.56197
H2BC9	-1.57522
PAGE4	-1.57717
CLCA1	-1.57811
PSG4	-1.57993
H3C7	-1.58238
NKX2-3	-1.58731
ADGRB1	-1.59223
MUCL1	-1.59591
RET	-1.60109
ALX1	-1.60469
INSL4	-1.60645
GPR26	-1.6066
GAGE1	-1.60697
GFY	-1.61271
H2BC1	-1.62252
SLC5A5	-1.6414
FZD10	-1.64513
TBX10	-1.65133
CT45A1	-1.65969
BPIFB2	-1.66065
PHOX2B	-1.6676
UGT2B11	-1.66775
H2AC14	-1.66853
INHA	-1.67131
RHCG	-1.67472
COL20A1	-1.675
LRRC26	-1.68076
PSG11	-1.68495
INSM1	-1.70146
FGG	-1.70612
SCGB2A2	-1.70663
PLSCR5	-1.71025
TMEM210	-1.71069
H1-1	-1.7164
OTX2	-1.73472
OPTC	-1.73692
CPS1	-1.73878
ALPI	-1.75074
UMODL1	-1.75647
CPLX2	-1.75889
SLC7A9	-1.77458
LBP	-1.79516
INS	-1.80346
NBPF4	-1.81145
ERVV-2	-1.81163
PI3	-1.81197
KNG1	-1.81787
LYZL2	-1.82345
BPIFB4	-1.8245
FGL1	-1.82815
MAGEA9B	-1.8288
PRODH2	-1.83801
TEX19	-1.84025
PAH	-1.84292
GCG	-1.84299
PAGE2	-1.84364
FGF21	-1.85313
MYCN	-1.86321
FOXI3	-1.86676
LRRTM3	-1.87148
OTOS	-1.87417
CDX2	-1.88092
PCP4	-1.89338
FGF4	-1.91687
ACTL9	-1.91796
KCNC2	-1.919
UMOD	-1.91931
CTAG2	-1.92089
OBP2A	-1.92523
AFP	-1.92623
KLK13	-1.92789
IL17C	-1.93659
ZFP42	-1.93812
ALB	-1.9401
AKR1C4	-1.95057
SSX1	-1.95193
DLL3	-1.95941
GH2	-1.96223
APOF	-1.96518
EVX2	-1.9837
CLEC2L	-1.98488
CTNND2	-1.99686
CD177	-2.00631
CALB1	-2.01024
DPPA5	-2.01293
PNMA5	-2.02264
VAX1	-2.02453
FOXG1	-2.03698
GP2	-2.03992
SLC39A5	-2.04594
ACTL8	-2.04644
BPIFA1	-2.09245
KCNU1	-2.11145
DEFA5	-2.11861
H4C13	-2.1228
PNMA6E	-2.14195
MAGEA9	-2.18724
NEUROD4	-2.23104
ADAM2	-2.24173
GUCA2B	-2.24615
PRSS56	-2.24697
COX7B2	-2.24986
NLRP5	-2.25067
BPIFB6	-2.26063
IGFBP1	-2.31919
LIN28B	-2.32912
CPN1	-2.35483
PCK1	-2.36353
NLRP8	-2.36768
CRP	-2.38307
ASCL1	-2.48792
SLC38A8	-2.4932
PNMA6F	-2.51003
CALCB	-2.51207
SPAG11A	-2.5432
FGA	-2.548
TF	-2.58657
PAGE1	-2.59468
MARCHF11	-2.61159
TRIM72	-2.6143
F2	-2.61799
BPIFA2	-2.62885
SLC30A10	-2.76118
NEUROD1	-2.76865
APOC3	-2.78891
CHRNA9	-2.83078
LCN15	-2.84634
UGT2B4	-2.89118
APCS	-2.92017
ZMAT4	-2.93824
NLRP13	-2.96108
KLK12	-3.05308
UGT3A1	-3.21276
G6PC	-3.33576
KCNJ18	-3.36246
SPAG11B	-3.4941
CALCA	-3.52072
LIN28A	-3.61724
PCSK1	-3.6823
NTS	-3.74668
CGA	-3.84547
FGB	-3.85865
SST	-4.54099
