# Supplementary material for: Four and a half LIM domain protein 1 as a Novel Prognostic Biomarker and Correlation with Immune Infiltration Levels in Lung Adenocarcinoma
Source: Research Square preprint supplement (doi:10.21203/rs.3.rs-1239170/v1), 2022-01-25
Supplement: Supplementary file 8 [file ead1121178677be6c3e60cf7.xlsx]

## Sheet: Sheet1
GSE118370	GSE63459	GSE27262	GSE118370 AND GSE63459 AND GSE27262
RTKN2	MME	GRK5	CCM2L
LINC01545	SH3GL3	LIN7A	CDH5
CCM2L	EDNRB	CAV1	SLC6A4
CDH5	AGER	KANK3	EDNRB
SLC6A4	ADAMTS8	PTPRB	PTPRB
EDNRB	SPTBN1	CCBE1	GIMAP8
SEMA6A	AGER	ROBO4	SDPR
PTPRB	FGFR4	CDO1	CLEC1A
GIMAP8	MCEMP1	AGER	VIPR1
SDPR	CA4	EDNRB	ADARB1
CLEC1A	ITLN2	SGCG	PECAM1
RHOJ	STARD13	CELF2	CLDN18
ABCA9	TEK	SPOCK2	NOTCH4
LOC105379426	ACADL	RGCC	FHL1
MESDC1	CLEC3B	GPM6A	TIMP3
TRPC6	TMEM100	SPP1	TCF21
VIPR1	CD300LG	SPTBN1	MACF1
ADARB1	GDF10	ADAMTSL3	CD36
PCAT19	SLC1A1	STARD13	SASH1
FENDRR	STX11	RASIP1	GRK5
LOC100507487	SDPR	IGSF10	FAM107A
FAT3	TMEM74B	GRIA1	TBX3
PECAM1	MACF1	ARHGAP6	SPOCK2
LOC101930541	FAM189A2	TNNC1	NDRG4
BEX1	ACVRL1	FAM107A	BTNL9
DST	COX4I2	EFCC1	FGFR4
CLDN18	TCF21	FGD5	STXBP6
GPM6A	TCF21	EMP2	JAM2
NOTCH4	CLIC5	SLIT2	SPTBN1
SHANK3	AGRP	FABP4	FOXF1
TMEM74	GPM6B	KCNK3	MME
C12orf74	TCF21	QKI	TEK
FHL1	HYAL1	NCKAP5	LIMS2
TIMP3	FCN3	GPM6B	TMEM100
PRX	FABP4	TOX3	ANKRD29
ROBO4	ANKRD1	FAM189A2	FEZ1
TCF21	HSPA12B	BTNL9	SH2D3C
TOX3	GPX3	ADARB1	CAV2
MACF1	CAV1	STARD9	PROM2
CD36	TNNC1	ASPA	CAV1
BLACAT1	FOXF1	FHL1	AGER
SASH1	GOLM1	ANOS1	GPX3
GRK5	COL13A1	CDH5	ADRB2
FAM107A	CDH5	CRYAB	NDRG2
TBX3	PTPRB	SLIT3	TBX2
SPOCK2	RASIP1	S1PR1	CALCRL
NDRG4	FHL1	MME	SLIT2
KCNK3	PDZD2	MYZAP	CAMK2N1
BTNL9	LPL	AGTR1	TMEM74B
LOC400794	CAV2	HIGD1B	SVEP1
TNR	FAM107A	KIAA1462	PTRF
GSTM5	RRAS	SDPR	FERMT2
FGFR4	LIMS2	NEBL	SH3GL3
STXBP6	PAFAH1B3	TEK	KLF4
KANK3	AHNAK	LDB2	S1PR1
JAM2	HBA2	EPAS1	RGCC
SPTBN1	CELF2	LIMS2	ACVRL1
FOXF1	HIGD1B	ACVRL1	ABI3BP
MME	BTNL9	OCIAD2	BMPR2
ACSS3	SPTBN1	RTKN2	GPC3
NRG3	ADRB2	TGFBR3	SPINK1
OR5E1P	OCIAD2	CAV2	GBP4
EMCN	JAM2	CDH19	SLCO2A1
SHROOM4	NTNG1	CA4	TGFBR3
FLI1	PID1	DPP6	EPAS1
TEK	FCN3	TCF21	RASIP1
LIMS2	GPIHBP1	STXBP6	C10orf67
TMEM100	LIMCH1	SERTM1	TMEM47
MCAM	FXYD6	CCDC85A	PDK4
FHL5	CCM2L	LIMCH1	SMAD6
ANKRD29	GRK5	ECSCR	CA2
FEZ1	PCOLCE2	SH2D3C	PDE5A
CBR3	EPAS1	ADGRL2	MMP7
SH2D3C	PECAM1	FRMD3	DACH1
AKT3	HSD17B6	COL10A1	FGD5
IGSF10	GPM6B	STX11	FABP4
KLRF1	CD36	DACH1
CAV2	LTBP4	DOCK4
QKI	NDRG4	SHANK3
KIAA1462	NME1	TMEM74B
FAM65A	SPOCK2	KL
CARMN	TBX3	GIMAP8
LOC101927699	CD36	PDLIM2
EPB41L2	ESAM	ADRA1A
PROM2	SASH1	AOC3
STARD9	LOC401286	DENND3
CAV1	PAPSS2	NTNG1
IL7R	ICAM2	HSPA12B
C10orf35	SLIT2	PTRF
AGER	TIMP3	ADIRF
KCNT2	PLAC9	ANGPTL1
GPX3	RGCC	GOLM1
TMEM246	FGD5	ABCC3
MTMR9LP	STXBP6	PCAT19
SEMA5A	ADARB1	ST6GALNAC5
ARHGEF6	S1PR1	LYVE1
ADRB2	GPC3	ERG
INSC	BMPR2	SEMA5A
NDRG2	ADIRF	TACC1
PCDH15	RAMP3	FERMT2
RXFP1	ADH1B	RXFP1
LOC100996760	PPP1R14B	HEG1
ZNF697	C10orf67	KCNT2
MPZL2	CLDN18	NPNT
TBX2	FMO2	PEAR1
LAMA3	RAMP2	EML1
MYLK	LDB2	COX4I2
CALCRL	CLEC14A	ANKRD29
SUSD4	GHR	SH3GL3
OR7E47P	LMO7	COX7A1
KIF26B	TSPAN7	CD93
SLIT2	CLDN5	RHOJ
CAMK2N1	HBB	PROM2
CCBE1	ANOS1	MMRN2
TMEM74B	MARCO	SASH1
LOC101928307	CLDN18	OTUD1
SVEP1	CPED1	FAT3
EPT1	LAMC3	FGFR4
TTLL7	MDK	LRRN3
PTRF	TBX2	FXYD6
FERMT2	DPYSL2	COL6A6
SH3GL3	TACC1	TBX3
LIMK1	GLIPR2	LOC285812
TRAF3IP2-AS1	TGFBR3	INPP5A
PTPRD	CFD	TMEM47
KLF4	KLF4	NOTCH4
HEG1	OCIAD2	BNIP2
ABCC3	VIPR1	FOXF1
SH3BP5	S100A4	ARAP3
CCRL2	FGR	PLAC9
S1PR1	MARCKSL1	PECAM1
RGCC	SFTPA1	FMO2
C10orf91	MAMDC2	TNS1
ACVRL1	SLCO2A1	LINC00968
ABI3BP	CDCA7	ARHGEF10
BMPR2	GIMAP8	HSPB2
ADCY4	CDO1	CLDN5
DSCC1	LDLR	PPP1R14A
SSR4	PTRF	ARHGEF26
GPC3	HYAL1	DENND2A
SPINK1	RASL12	GHR
GBP4	TMEM204	VGLL3
MYL9	PODXL	SLC6A4
LINC00961	AFF3	PTPN21
SEC14L1	CLEC1A	GIMAP6
MEIS1	PLLP	ITGA1
SH3D19	GLDN	C10orf54
HSPC324	CYP4B1	CD36
TIE1	CD93	RECK
USP47	DACH1	SEPTIN8
SEMA3G	CYYR1	GFOD1
ERG	FGR	TIE1
SLCO2A1	WFDC1	CORO2B
MSRB3	SH2D3C	SEMA6A
LINC00312	SOSTDC1	SH3BP5
TGFBR3	TCEAL2	FIBIN
KL	INMT	THBD
MCOLN3	HPGD	GPIHBP1
ID2	PPP1R14A	FEZ1
TNXB	FBLN5	TAL1
EPAS1	NOTCH4	ARRB1
CCDC50	TNFRSF21	ADAMTS8
HOXA4	ABI3BP	MAMDC2
ITGA8	CES1	EMCN
PPFIBP1	PDK4	TOP2A
ZNF331	ALDH2	LGI3
PRF1	NES	AHNAK
LAMA4	CALCRL	LMCD1
KCTD16	SLC6A4	RWDD1
SYNPO2	H3F3B	ABLIM3
RASIP1	S100A4	CCM2L
C10orf67	AQP4	PKIG
TMEM47	FEZ1	CLIC5
TNS1	CLIC3	RAI2
PKHD1L1	LRRC32	RNF182
ARHGEF15	HBEGF	LTBP4
EML1	MYH10	DPYSL2
FAM173B	FERMT2	FAM65A
PDK4	ADGRL2	PYCR1
GATA6	CYBRD1	CAB39L
NKG7	TOX2	LHFP
SMAD6	HYAL2	TOX2
CA2	VGLL3	SERINC2
YME1L1	CGNL1	HS6ST2
SGCG	GNG11	RAMP2
SULT1C4	S100A3	UBE2T
PDE5A	C1orf106	FCN3
AQP3	IL1RL1	MYCT1
ASPA	LAMP3	GYPC
GAB1	TGFBR2	ST6GALNAC1
WFDC2	TUBB3	ABI3BP
FRMD3	COX7A1	NOSTRIN
MMP7	SFTPC	SPRYD7
DACH1	LILRA5	PPM1F
SEMA3F	PLEKHH2	SOX7
ECSCR	LMCD1	TMEM204
PHLDB2	PSAT1	ZNF106
SYCP2L	SRPX	ARHGEF15
RNF125	MFAP4	SYNE1
FERMT1	IL18R1	GAB2
GRAMD3	PPARG	SVEP1
FGD5	PEBP4	SCN4B
FABP4	HIST1H2BD	AGR2
FLJ34503	SVEP1	TSPAN18
CFL2	ANKRD29	SRD5A1
DNAH14	LHFP	P2RY14
RDX	KLF9	ESAM
HLA-E	TOP2A	HN1L
CLIC6	PAICS	PEAK1
NOVA2	MMP28	KANK2
ADRA1A	DKK3	PTPRM
	COL1A1	GPR146
	PPP1R15A	TBX5-AS1
	CSRNP1	PRKCE
	MYADM	FENDRR
	P3H2	RAP1A
	TMEM47	ZEB1
	PLA2G1B	ADGRB3
	VSIG4	PKNOX2
	ETS2	GDF10
	ENG	C1orf106
	DKK3	VWF
	NOSTRIN	RRM2
	MMP11	EPB41L5
	SULF1	CLEC14A
	GYG2	KIAA0101
	UBE2T	PRKCH
	GPT2	LINC00312
	PROM2	PIP5K1B
	FZD4	STON1
	RGS17	LAMC3
	HOXA5	JAM2
	SMAD6	HLA-E
	CD24	SNCA
	HSPB8	LRRFIP1
	OLR1	CBFA2T3
	CDC20	P2RY1
	TIMP1	MCC
	DUOX1	ACE
	ASPM	SSR4
	NDRG2	PRX
	PDE5A	EPB41L2
	ARAP3	ADH1B
	CTHRC1	FRY
	ALOX5AP	GATA2
	SLC46A2	WFDC2
	VWF	FGFBP2
	FCN1	ACADL
	SBK1	SYNM
	FAM150B	LIFR
	RPL13AP17	FUT2
	ANKRD20A1	FXYD1
	KIAA0101	MFNG
	CDCA5	LMO2
	TK1	GALNT7
	ADH1A	SLC39A8
	CAMK2N1	AFAP1L1
	ALOX5	SLC22A18
	GMDS	LATS2
	PLA2G4F	TMEM178A
	KLF6	HLX
	WFS1	CD24
	CPB2	HMBOX1
	MAL	CCDC102B
	GIMAP5	PRICKLE2
	CRYAB	ARHGAP31
	ANGPT1	BDNF
	C1orf162	PALD1
	CCNB2	ADRB2
	PMP22	ABCA6
	CAV2	CLEC1A
	GPER1	OR7E47P
	SLC25A25	TMEM45B
	CRABP2	ICAM2
	ADGRE5	AFAP1-AS1
	SLC2A1	CLDN18
	IL1RL1	SMAD9
	CACNA2D2	GIMAP1
	WISP2	FGF2
	LRRK2	PCYOX1
	COL10A1	AFF3
	CXCL2	EFNA4
	CDC45	MAOB
	MELK	NEXN
	GAS6	EIF1
	UBE2C	CCDC50
	CRTAC1	CNRIP1
	HIST1H2BD	SRPX
	PODXL2	C1orf53
	MT1M	FZD4
	THBS2	ENC1
	FHL2	TRPV2
	FHL2	ST6GALNAC3
	CD83	DLC1
	LEPR	MASP1
	GAS6	AKAP12
	FBXO32	SOX17
	IGFBP3	EPHX3
	HMGB3	ST14
	CDH3	CST1
	FRAS1	MCEMP1
	MMP12	TMEM184A
	SPDEF	COMP
	PLBD1	AGTPBP1
	NUSAP1	S100A4
	CELSR3	GCNT3
	APOL3	BCHE
	IGFBP3	MYADM
	PGM5	F2RL1
	PGM5	PDE5A
	NKD2	ITM2A
	SPP1	IL17D
	CXCL13	KIF20A
	PTTG1	KLF9
	SOCS2	GABARAPL1
	FKBP11	MEF2A
	HS6ST2	RBMS2
	BMP2	RAB8B
	GJB2	KIAA0040
	ID1	LPL
	FAM110D	ITIH5
	SPARCL1	PHACTR2
	BCHE	PARVB
	FAM83A	MYH10
	GKN2	NEDD9
	S100A8	WISP2
	COL3A1	LINC00702
	TPSAB1	PDE3B
	HMGA1	FYN
	LAD1	SNTB2
	MS4A7	RNF144B
	C2orf40	MFAP4
	ZNF385B	RBM17
	CA2	ADPRH
	SIX4	PLEKHH2
	ZBTB16	MSRB3
	COL5A2	PAPSS2
	AURKA	ADGRL3
	CYB5A	H2AFJ
	ZFP36	FHL5
	CX3CL1	CDH13
	NDNF	ZWINT
	GBP4	LOC400568
	SCG5	SEMA6D
	TNFSF10	SPDEF
	FBP1	CFD
	ADGRF5	PLPP2
	CLDN3	PCDH12
	ZBTB16	MSI2
	AQP9	CSRNP1
	EFEMP1	NPR1
	ADAMDEC1	SH3D19
	COL1A2	SERPING1
	GADD45B	PDS5B
	IGFBP6	EGFL7
	CD55	HYAL2
	SUSD2	BVES
	FOLR3	GAS6
	PRC1	SLC50A1
	C10orf10	ARHGEF6
	DNASE1L3	C14orf132
	TPPP3	HMGB3
	FLRT3	SOWAHC
	ADAMTS1	PLPP3
	SLPI	LPAR1
	PCP4	CPED1
	DUSP1	STARD8
	PITX1	GGCT
	FPR1	XDH
	ABCA3	PMP22
	VSIG2	TXNL1
	CD19	ABCA8
	GCNT3	TRHDE
	KRT8	FLI1
	KLF2	ZEB2
	KRT80	ITGA8
	FBLN1	AKT3
	EDN1	ANGPT1
	CFB	SPG20
	SPP1	RSPO1
	IL6	UHRF1
	MMP9	ERP44
	THY1	KLF4
	FBLN1	STK39
	COMP	RDX
	TSC22D1	GNG11
	SERPINE2	BMPR2
	CPA3	CREB3L4
	SFTPD	NRN1
	COL11A1	CENPF
	CD52	TIMP3
	VPREB3	LOC101928370
	DCN	HMMR
	CCL19	OLFML1
	MYH11	PAFAH1B3
	ITPKA	FAM46B
	UBD	MANEAL
	A2M	ETV4
	MT1A	ANO6
	C15orf48	RASSF2
	EMP1	TMTC1
	DNAJC12	DNAJC15
	DCN	SDC1
	HES6	STX2
	DNAJC12	BLACAT1
	FOSB	PGM5
	SPINK1	ANLN
	ALPL	SFTPC
	MMP7	METTL7A
	ATF3	SLC19A3
	EEF1A2	TUBB6
	CD79A	SLC9A7
	CCL2	DCC
	SOX18	SEPTIN10
	FOLR1	NTRK3
	NTM	SNRK
	MT2A	CMKLR1
	CLDN10	EPHB2
	PTGDS	LOC101928307
	SCGB1A1	FAM122A
	SCGB3A2	WIF1
	FOS	BCL2L15
	SFTPB	CYYR1
	PGC	FLT4
	TUBB2B	ZDHHC14
	MZB1	EHD1
	C4BPA	GMFG
	LCN2	LAMP3
	HBG2	KCNMB4
	FGL1	PDIA4
	KLK11	SOX5
	S100P	NUSAP1
		ARHGAP29
		GSTM5
		SPX
		FUT3
		MAGI2-AS3
		KIF26B
		AMOTL1
		MYOC
		COL13A1
		DNAJB4
		MARCO
		RASGRP2
		LRRC31
		LOC105379426
		SEMA3G
		SGCB
		AP1M2
		LMO7
		NEDD4L
		SEC14L1
		GIMAP7
		LOC729680
		ADCY4
		CDH3
		FAM150B
		KCNJ8
		GJD3
		ETS1
		ZNF366
		VAPA
		LAD1
		MS4A15
		TPBG
		UBE2C
		BUB1
		TBX5
		NLN
		EOGT
		GALNT18
		ADRB1
		JAM3
		NDRG2
		HPCAL1
		TSPAN7
		RBMS3
		MTA3
		LOC101929398
		BIRC5
		SEPTIN7
		KIAA1324L
		RASL12
		TMOD1
		FRK
		NES
		DST
		CACNA1D
		SLC39A11
		PSAT1
		DOK6
		TGFBR2
		PDE1C
		SPARCL1
		TNPO1
		RMI2
		FOXP1
		MCTS1
		CP
		HKDC1
		MYL9
		TBXA2R
		TTC7B
		TRIM59
		CLDN12
		SGIP1
		STX3
		PIK3R1
		MACF1
		ENG
		KCNK5
		MEIS1
		AOX1
		PCOLCE2
		FERMT1
		FRMD4A
		EFR3B
		PDE8B
		PRKCB
		CCNB2
		ASPM
		ATOH8
		PGM2L1
		IDH2
		CDCA8
		RAPGEF4
		ERO1A
		PTH1R
		PLSCR4
		CDC20
		TTC28
		RHBDL2
		HSPB8
		SIDT1
		GPC3
		RADIL
		TMEM88
		RRAS
		CCNB1
		ADAMTS1
		TSPAN6
		GPR160
		SRPK1
		GPD1
		ELMO1
		CD300LG
		SCN7A
		SLC44A1
		C1orf115
		KDELR2
		MAGED1
		SGCA
		ITPRIP
		CENPU
		SMAD7
		CFL2
		FOXO1
		GJA4
		SOSTDC1
		TMEM246
		TXNDC17
		GINS1
		TSC22D1
		FUT1
		PTGIR
		PTPRD
		PREX2
		PLEK2
		FAM162B
		SLC52A3
		SRD5A3
		DSEL
		PDGFB
		CAMK2N1
		HPS3
		PLCL1
		ABHD6
		NEK2
		WFDC1
		ATIC
		LOC100506098
		C1QTNF7
		ANKS1A
		LOC102724611
		NPR2
		GUCY1A2
		TMEM99
		HN1
		UNC5CL
		CEACAM1
		KIF11
		CCDC68
		PLEKHA6
		KLF2
		SMIM22
		PGM5-AS1
		CDK1
		ZC3H12C
		MYO6
		GPX3
		CDCA7
		PARD3B
		FAM199X
		STIL
		TBX2
		CTNNAL1
		PTGFRN
		PHACTR1
		DNAH14
		IGSF9
		ARAP2
		PRDM11
		TFAP2A
		CAT
		ALDH18A1
		CHPT1
		OLFML2A
		DOCK11
		PDZRN3
		PRDX4
		A2M
		DOCK6
		KDELR3
		BUB1B
		CLDN4
		NCALD
		GINS2
		GDF15
		CTHRC1
		MSTO1
		ABHD11
		DLGAP5
		BAIAP2L1
		TMEM177
		EIF2AK1
		TK1
		ULK2
		PREX1
		KAZN
		HCAR3
		LINC00467
		PGAP1
		XPR1
		STEAP3
		HOOK1
		CTTN
		ADAMTSL4
		TTN
		GBP4
		CNTN6
		NUP62CL
		HMGB3P1
		GIMAP4
		ENO1
		EIF3M
		UBL3
		CALCRL
		RS1
		CDKN3
		WFS1
		LRCH1
		NLRC4
		TMEM100
		LINC00938
		CEP55
		ID1
		TYMS
		PIK3C3
		ATP10B
		SOCS2
		PAK6
		PDPN
		KLF6
		SMAD6
		HELLS
		ADGRD1
		TLR4
		PDK4
		PHEX
		SUGCT
		CPB2
		GNL1
		HACD1
		CASP12
		PALMD
		TPX2
		PPP1R14B
		SORD
		PODXL
		SAP18
		SNX1
		ANKRD22
		PDZD2
		RAB23
		HSD11B1
		HBB
		LGI4
		DAPK2
		TMED3
		ATP2A2
		MT1M
		SNRNP25
		NKG7
		PAICS
		ARC
		GJB2
		FPR2
		MAL
		PNPLA6
		SAMD5
		FILIP1
		HSPC324
		PKDCC
		UQCRB
		CRABP2
		BCL6B
		EPCAM
		STAP2
		MIR3945HG
		ABCA9
		KRT80
		NFASC
		NME1
		LAPTM4B
		PARVA
		SLC5A9
		MOCS1
		LOC286191
		C2orf40
		CASKIN2
		CRTAC1
		SIK2
		ACAD8
		EHD2
		MKI67
		PRKCQ
		SLC24A3
		SHROOM4
		PPARG
		CNKSR2
		FAM110D
		SLC41A2
		TMPRSS4
		METTL7B
		KLRD1
		DNAJC18
		CKS1B
		TBX4
		CLDN3
		VIPR1
		MELK
		OSCAR
		HJURP
		UACA
		C1GALT1
		HOXA4
		APOLD1
		GRASP
		PODXL2
		TTK
		NDRG4
		GKN2
		MDK
		STYXL1
		RARRES2
		GPER1
		LGALS3BP
		PTTG1
		DLL1
		STRBP
		PRELP
		LGR4
		DPY19L1
		RAB11A
		C11orf80
		SLFN13
		AURKA
		BZW2
		ID4
		RSPO2
		NPR3
		KANK4
		MAD2L1
		TRPC6
		TMEM106B
		RCC1
		ARGLU1
		PPARGC1A
		EBF1
		PRF1
		RAMP3
		PIGM
		KIF14
		KLRF1
		SYNPO2
		CSPG4
		RSPO3
		PAIP1
		SLC51B
		PRKG1
		GLIPR2
		RORA
		SULT1C4
		CXCR2
		SPAG5
		SOX4
		PCDH9
		MND1
		MRC1
		NECTIN4
		C10orf67
		ADGRE5
		MCM2
		HMGCLL1
		LSR
		DENND4A
		PHLDB2
		GZMH
		DES
		DIXDC1
		B3GNT3
		FBLN5
		CLIC3
		FAXDC2
		TLCD1
		GPSM1
		LAMA3
		ABLIM1
		MUC3B
		VSIG4
		ZNF331
		LOC285043
		SBK1
		TMEM64
		CETP
		GAB1
		ARHGEF19
		RNF43
		CFP
		MICU3
		C4orf32
		CENPK
		SPAG4
		ACACB
		FUT6
		PTGER4
		FGR
		PEBP4
		LGALSL
		EHF
		RGS2
		SRPRB
		ART4
		NKD2
		TIMELESS
		DPEP2
		LRP4
		PPP1R15A
		PABPC1L
		YME1L1
		KLF13
		LINC01268
		ADAMTS15
		CDCA5
		IL6
		PPFIBP1
		LAGE3
		EFEMP1
		RGS9
		FUT8
		SLC46A2
		ADGRF1
		OGN
		ACKR4
		DUS4L
		SIX4
		HYLS1
		GALE
		RCSD1
		CXorf36
		TCEAL7
		ABCA3
		KCNK1
		FRAS1
		KIF18B
		LRRC32
		UPK3B
		DKK3
		CDKN1C
		FBXL7
		ZHX3
		DONSON
		MPDZ
		PTK7
		MMP11
		SFXN1
		PID1
		PDE2A
		PPBP
		ABCC9
		PRC1
		SLC14A1
		BMP5
		MNDA
		HYAL1
		AQP4
		RALGPS2
		ROR1
		EPB41L3
		JPH2
		TGM2
		GALNT3
		LSAMP
		NXPE3
		TMC5
		PCAT6
		POLE2
		CBX7
		SH3GL2
		PROS1
		GUSB
		ECE2
		LMOD1
		ZAK
		KPNA2
		TRIM2
		SGPP2
		MELTF
		TMEM63C
		CARD16
		C4orf48
		KIAA0907
		SEL1L3
		WASIR2
		LOC100996760
		KCTD12
		SLC25A13
		FKBP1B
		SLC6A16
		ADGRE1
		RNF125
		CACNA2D2
		PTPRG
		SEPTIN4
		DUSP1
		DAP
		PTPN5
		C8orf88
		DPT
		MTURN
		BMPER
		FOXF2
		GPT2
		CDC42EP2
		VAMP5
		BMP6
		RAB11FIP1
		DCN
		HOXA5
		SLC22A18AS
		CCDC167
		ZDHHC13
		E2F8
		KLHDC7A
		PAG1
		MTARC2
		B3GALNT1
		ALDH3B1
		STK32A
		TMEM182
		MICALL2
		PLPP5
		SFN
		CACNB2
		EZH2
		PLA2G5
		C2CD4A
		NCAPG
		FRMD5
		TNS2
		VEGFC
		RAB25
		ATP1A2
		DDR2
		TOM1L1
		HABP2
		HBEGF
		MVB12B
		KCNN4
		JAML
		CFLAR
		FSTL3
		ANXA3
		INSC
		DNASE1L3
		OPTN
		TTLL7
		BICDL2
		ABCG1
		CLIC6
		GLB1L2
		TCF4
		DPP10-AS1
		ECM2
		VARS
		LINC00472
		SIRPB1
		IL1RL1
		TMEM55A
		GLB1L3
		JAKMIP2
		TMEM35A
		BRIP1
		H2AFV
		NOS1
		RNASEH2A
		CDCP1
		GOLPH3L
		NR4A1
		FAM101B
		GGCX
		MUC20
		KDM5B
		MNX1
		PRDM5
		DUBR
		FIGNL1
		SYNE4
		RNF157-AS1
		NHS
		LAMA4
		BARD1
		MARVELD3
		C1orf21
		LRIG3
		OBFC1
		MAP3K13
		FAM13C
		TMCC3
		KIF4A
		TRDV3
		ALOX5
		ZFPM2
		GNLY
		NUDT16L1
		ESYT2
		THBS2
		LINC00622
		HK3
		SORBS2
		HES6
		CYBRD1
		HEY1
		UBASH3B
		COLGALT2
		FAM105A
		DSTN
		FUCA1
		VDR
		EIF4E3
		GADD45B
		SELP
		HSPB6
		HIF3A
		DIAPH2
		GSDMB
		SLC2A1
		USP53
		ILDR1
		RPA3
		RAB26
		TDRKH
		SLC11A1
		MIS18A
		KCNQ3
		SSTR1
		SOX9
		SLC2A3
		NDST1
		CCNO
		PC
		IRAK1
		TINCR
		COL11A1
		SPIDR
		FAM49A
		CAPN8
		EDNRA
		SLC2A5
		SLC25A25
		PRAM1
		LOC100505938
		TMC4
		JDP2
		VSTM4
		SBSPON
		SYT15
		GNG2
		TWIST2
		SCN2B
		AGAP11
		ADAMTS9-AS2
		MYLK
		SEZ6L2
		PPP1R16B
		ODAM
		LONRF1
		IQGAP3
		MTX2
		ZYX
		MEX3A
		HHIP
		NHSL2
		EFNB2
		PCDH17
		CHRDL1
		RASSF8
		SYNJ2
		BDH1
		C1orf162
		PGR
		SCEL
		GORAB
		FAR2
		CEP41
		MS4A7
		FABP5
		TFAP2C
		BIK
		PDCD2L
		ASCC3
		MESDC1
		SHCBP1
		GLIS3
		HPRT1
		NCK1
		FLVCR1
		ADGRG6
		EPN3
		PRSS16
		RFC4
		LOC100506990
		BMP2
		FBXO16
		FUNDC1
		SAR1B
		FNTB
		CCNA2
		SLC44A4
		MACC1
		TMTC4
		FBXO32
		FLT1
		SULT1A2
		FEN1
		NMU
		CEBPD
		C1orf112
		EDN1
		CRIM1
		CST2
		GJB1
		SLC38A5
		CD52
		ASF1B
		KIF2C
		KNL1
		FANCI
		LOC100505920
		SIK1
		GALNT10
		ANP32E
		LOC101927069
		FOXM1
		TSTA3
		FGF10
		C5AR1
		MSR1
		PAQR4
		WASF3
		CCDC141
		LINC01128
		DGKH
		RHNO1
		TMEM159
		GYG2
		KIF16B
		DOPEY2
		CA3
		SLK
		RPL39L
		LILRB2
		MCM8
		KCTD15
		EMP1
		ADIPOR2
		DGKE
		ABCB6
		CLPTM1L
		LOC107985971
		NR4A2
		GRHL1
		RMST
		SSFA2
		NEK6
		GINS4
		IL18R1
		BACH2
		APOL3
		CST4
		PTPRD-AS1
		KCTD1
		ARL13B
		ARL6
		PPAT
		RALY-AS1
		BDH2
		STYK1
		NDC1
		C7
		GPRC5A
		SPN
		PTGES
		NGEF
		GMDS
		HECW2
		VEPH1
		FGD6
		DKK2
		ITGA5
		COL1A1
		RPL23AP32
		TMEM92
		HIST1H4J
		TSPAN12
		FBLN1
		NDNF
		SLC7A7
		GPR4
		SLC31A2
		CDCA3
		AVPI1
		ID2
		GMNN
		DZIP1
		KNTC1
		CENPE
		MAP7D2
		LINC01207
		S1PR5
		SLC1A4
		UGT8
		RXRG
		ZDHHC9
		IKZF2
		C10orf128
		NCAPG2
		PRIMA1
		EMB
		DEPDC1
		FAM171A1
		DOK5
		ACP6
		NUP210
		ID3
		CLEC12A
		NEGR1
		ELF3
		AURKB
		CASS4
		PLEKHA8
		SPNS2
		C11orf21
		ZNF423
		PDK1
		SDSL
		GPR161
		ECT2
		KIT
		MESP1
		C1QTNF2
		BICDL1
		DUOX1
		PRKAR2B
		RUNX1T1
		SFTA1P
		OSR1
		FCGR3B
		SAMD4A
		NAP1L5
		FAM43A
		MFAP3L
		TLR8
		CST7
		TMEM108
		S100A12
		FAM83A
		LBH
		KRT4
		DEPTOR
		GREM1
		CD55
		KIAA1217
		AIF1L
		CLDN1
		ANXA1
		C11orf96
		IL33
		SGCE
		SLC16A5
		CENPL
		LRRC36
		GFPT1
		MMP12
		ITGA11
		LACTB2
		SORBS1
		PCBD2
		EIF3F
		NCAPH
		KNOP1
		BEAN1
		BCL2L14
		SLC30A9
		GPA33
		SCARA3
		NHSL1
		SCAI
		NCF2
		PILRA
		GAS1
		PLCB4
		MMP7
		S100A3
		DOCK9
		ZBTB16
		TBC1D8B
		CDC6
		FMO3
		NQO1
		PKIA
		CCDC34
		LDLR
		ERBB3
		KLK10
		PBK
		REEP6
		GTSE1
		PLLP
		CXCL14
		KIF15
		ADAM28
		FPR1
		RNFT2
		KLRG2
		SIX1
		MAFF
		UNC13D
		LRRC8E
		LOC100049716
		LARP6
		TM6SF1
		CMTM2
		DNAJC22
		PLEKHG4B
		HOXA-AS2
		MST1R
		WNT2B
		NR2F1
		HHAT
		SESN1
		SRPX2
		ACSS3
		IFT57
		PTGDS
		EID3
		NDC80
		MYRF
		DPP4
		KIAA1522
		RCAN1
		NR4A3
		MCM4
		PLCE1
		TMEM140
		LOC100506725
		SPATS2L
		SLCO5A1
		SETBP1
		CBLC
		E2F3
		ZBED2
		FCN1
		FILIP1L
		PDCD1LG2
		GFRA3
		ZFP36
		RBPMS-AS1
		OR7E14P
		KRTCAP3
		DEPDC1B
		SGO2
		EIF5
		SOD3
		GVINP1
		KCNAB1
		TMEM54
		COL9A2
		FGF14
		CAPN12
		ODF3L1
		KCNA5
		SULF1
		CLEC4E
		PRR11
		EXO1
		PKHD1L1
		MSX1
		C3orf14
		TIMP1
		RTN1
		HIST1H2BD
		HEYL
		RHOB
		TEX10
		CENPM
		FAXC
		TUBB1
		DPP10
		CNN1
		C2
		SEC24D
		KIF23
		RPP40
		VSNL1
		IDH1
		ETS2
		OAZ3
		OVOL1
		CRYM
		COL3A1
		FARP1
		FLJ35700
		CD247
		TTC22
		BACE2
		EGF
		KRT15
		CLU
		LINC00342
		CCNE1
		LRP8
		GZMB
		NT5E
		IL4I1
		CD160
		SPINK1
		MFSD4A
		IL7R
		SCARA5
		NPY1R
		DYNC1I2
		DNA2
		ABCG2
		FAT4
		SLC35F2
		ARID5A
		TNFRSF18
		DHFR
		NFE2L3
		NECAB1
		ADAM33
		VWA1
		CCL23
		LOC643733
		TBX21
		KLHL7
		AGMAT
		FZD10
		CCND2
		FCGBP
		CSF2RB
		BRE-AS1
		CYGB
		RAD51AP1
		XKRX
		DERL3
		F12
		KIAA1211L
		C1QA
		CYP27B1
		BAALC
		FBP1
		WNT2
		BOLA1
		INMT
		CLC
		FOXO6
		ATAD2
		MMRN1
		MYH11
		PGC
		AQP1
		ARHGAP44
		CADM1
		MYOCD
		PCDHGC3
		ESRP1
		MMP1
		LOC101927263
		ROBO2
		LRCH2
		LOXL1-AS1
		GRTP1
		PCM1
		C6orf141
		ATF3
		PHLDA2
		SLC5A3
		CXorf57
		CSGALNACT1
		PCDH7
		RAB37
		FGL2
		TSLP
		ADGRA3
		MET
		S100A8
		HIC1
		TNFRSF21
		MFSD4B
		GATA6
		NTN4
		BLNK
		PITPNC1
		FST
		TMEM237
		WDHD1
		ZNF107
		CXCL2
		SLCO1A2
		NUF2
		MAP2
		HRASLS
		ATP5S
		MAP3K8
		SYNC
		BCL11A
		PDIK1L
		TMEM139
		FA2H
		KLB
		TGFB2
		CD274
		MT2A
		ADAM12
		CSF3
		CCDC144NL-AS1
		NKD1
		TUBBP5
		MOCOS
		RSPO4
		HPSE
		CEACAM6
		EGFL6
		MIR34A
		FLRT3
		RERG
		CENPW
		MRGPRF
		AQP9
		NRIP3
		CDC45
		C8B
		GRHL2
		ADAM8
		OIP5
		ST6GALNAC2
		TTC39A
		SH2D1B
		OSBPL6
		ADM
		S100A2
		PAPLN
		CXCL13
		PKIB
		PSPH
		C15orf48
		SLC9A3R2
		CXCL12
		TUB
		TPPP
		ZNF138
		NDUFA4L2
		CRISPLD2
		RND3
		FAP
		LILRA2
		CD163
		IL18RAP
		PDE4D
		PF4
		SOCS3
		MST1
		MMP15
		LIPH
		FKBP11
		TMEM97
		SPC25
		NRP1
		MUC1
		SLC16A7
		METTL1
		NFIL3
		PEG3
		NR5A2
		IRF7
		TCF19
		PROK2
		PPFIBP2
		DMD
		LMNB1
		ADAMTS9
		C1orf226
		ALOX5AP
		ABCA12
		IGFBPL1
		ACSL5
		LCT
		XCL1
		CRTAM
		ANK2
		EGLN3
		REEP1
		STK31
		AXIN2
		COL1A2
		RAMP1
		CEACAM5
		LOC101928429
		NPAS2
		LYPD1
		HCK
		CTGF
		HNF4G
		KLK11
		KIAA0895
		MAOA
		ACE2
		HOXD4
		ADGRL4
		ARHGAP28
		ANKRD36B
		CDKN2B
		PCDHB4
		GZMA
		ADD2
		GJA5
		SMTNL2
		OLFML3
		ZNF280B
		CASQ2
		MYH2
		DDX11
		ST8SIA1
		KLF15
		ITGB4
		COL8A2
		DCLK1
		EEF1A2
		PLCH1
		FGFR2
		LOC728613
		MPZL2
		HSPB3
		CSF3R
		MALL
		MT1HL1
		COLEC12
		FAM167A
		ANXA9
		LRRC2
		FOXA3
		PLS1
		P3H4
		CD69
		SULT1C2
		CILP2
		LRRK2
		EYA4
		LEMD1
		RGS17
		RAP1GAP
		ENTPD3
		SHC3
		IGF2BP3
		RGS18
		SCD5
		SCUBE3
		ITGAL
		CX3CR1
		ACSL4
		FGF7
		MT1X
		ENPP5
		TENM4
		EME1
		MFAP2
		FOSB
		SCNN1G
		SYT12
		ADORA3
		GRIP1
		CCNE2
		KISS1R
		STEAP1
		COL5A1
		FAM169A
		CDKN2A
		TEX9
		ADAMDEC1
		TCEAL2
		LRRC15
		GPX8
		CLSTN2
		TCEA3
		KRT8
		SIX2
		PCP4
		PRR15
		CCDC69
		ARNTL2
		HMGA1
		CENPH
		ACTG2
		PWAR6
		CD34
		HGF
		SFRP4
		EP300-AS1
		DSG2
		TPPP3
		FAM134B
		SOX11
		CFB
		SFTPD
		ZNF117
		PRRG3
		MCM10
		CD1A
		CYP1B1
		CCL19
		JPH1
		HOXD1
		COL6A5
		SELE
		CYP2J2
		PPARGC1B
		SFTPB
		SLCO2A1
		ACKR3
		SCGB1A1
		CHRM1
		MT1E
		MIR146A
		SEMA4B
		MAP1LC3C
		FREM3
		KDR
		PLA2G1B
		CRLF1
		DMRTA2
		IL1A
		PNMAL1
		PLD5
		COL17A1
		FHL2
		MCAM
		SERTAD1
		PRICKLE1
		PNMA6A
		MXRA5
		P3H2
		CD109
		ABCA4
		JUNB
		PLAC8
		MT1H
		IRF1
		SECISBP2L
		RAB27B
		ACKR1
		LRG1
		LAMP5
		PHACTR3
		C4BPB
		PLAU
		VSIG1
		TENM2
		LRRTM2
		NXF3
		ARSE
		ZNF677
		ZNF750
		MYC
		CX3CL1
		GALNT6
		CKS2
		OLR1
		PBLD
		TNFRSF10D
		TESC
		PRR15L
		SUSD4
		ADORA1
		IGFBP3
		SLC7A5
		ENPP3
		VMP1
		ANKRD1
		KIAA1683
		MMP9
		DUXAP10
		GJC1
		TNC
		NLGN4X
		EGR1
		CREM
		COL5A2
		MT1G
		PCDHGA3
		SLC28A3
		CXCL3
		WISP1
		ENPP2
		DENND1B
		BCL2A1
		TEAD4
		VSTM2L
		CTSW
		PLA2G7
		SYTL1
		PLA1A
		SLC1A1
		PLOD2
		HAS1
		HLF
		TRIM45
		AOC1
		XPO1
		LDOC1
		CLEC5A
		CD207
		HIST1H2BH
		PLEKHS1
		SLC7A11
		PCSK1N
		CCL4
		HMGCS2
		IL1B
		MX2
		ANKRD36C
		CD19
		PON3
		SMKR1
		RBP4
		CXCL5
		FAM3B
		MMP19
		TC2N
		HSD17B6
		IRAK3
		GRAMD2
		TSPAN5
		C1QB
		CYR61
		CYS1
		CHRM3
		KLRC3
		ZNF667-AS1
		GLDN
		CLDN2
		SOX18
		PLCXD3
		LOC100507311
		NANOS1
		PRDM6
		GIPC2
		S100A10
		MTARC6
		CLDN11
		ITGA2
		SFRP1
		RASSF9
		ZNF300P1
		MMP13
		TRIP13
		SUSD2
		PPP1R14D
		PTGS2
		PTGFR
		MUC5B
		WDR66
		PLA2G4A
		CDKN2C
		OMD
		FNDC1
		ADTRP
		SLC4A11
		MT1F
		CA9
		C10orf10
		AQP5
		LCAL1
		PIGR
		DEPDC7
		LOC100506922
		MARCKSL1
		SCG5
		LGSN
		SEC14L4
		CYP26B1
		TM4SF4
		LINC00551
		TNR
		TDO2
		RASSF6
		GPX2
		CEACAM7
		CA2
		EFHC2
		RPS24
		THY1
		MUC16
		POU2AF1
		ABCB1
		HOXC10
		LCN2
		VTCN1
		COL4A5
		FOS
		CA10
		PADI4
		COCH
		IGLV1-44
		SLCO4A1
		SERPIND1
		HOXB7
		TMEM27
		GALNT14
		PTCH1
		AIM2
		CYP24A1
		KIAA1324
		POF1B
		TNFSF15
		EGR3
		ZNF385B
		GPR87
		CCL21
		TNFRSF17
		SEMA3E
		DIO2
		ATP8A2
		SCGB2A1
		TBC1D30
		FGF13
		NAMPT
		DSP
		RGS13
		NOX4
		PAQR5
		CEMIP
		CILP
		DNAJC12
		KIAA2022
		CYP4B1
		FOXA1
		PRTG
		IFI6
		RETN
		HOXA10
		IGLJ3
		UGT2B15
		PLXNB3
		VNN2
		FOLR3
		SP8
		MATN3
		CHI3L1
		AMER2
		DRAIC
		MEOX2
		LTN1
		KIAA1211
		MS4A2
		SPINK5
		SLCO4C1
		ERICH5
[truncated: 84 more rows]
